# Supplementary material for: Associations of obesity-related indices with mild cognitive impairment in adults 60 years and older with type 2 diabetes: a retrospective study
Source: PeerJ. 2025 May 13;13:e19442. doi: 10.7717/peerj.19442 (PMC12083468; doi:10.7717/peerj.19442)
Supplement: Supplemental Information 1 [file peerj-13-19442-s001.xlsx]

## Sheet: Sheet1
NO	Age	Gender	Duration of T2D (year)	Metformin	Insulin	Sulfonylureas	Nateglinide	Thiazolidinediones	Glycosidase inhibitors	DPP-4 inhibitors	GLP-YESR agonists	SGLT-2 inhibitors	Hypertension	CHD	Stroke	Smoking	Alcohol use	BMI	WHR	WHtR	LAP	BRI	CI	BAI	AVI	ABSI	TyG	CMI	BH	BW	WC	HC	HbA1c	FPG	TC	TG	HDL-C	LDL-C	BUN	Scr	UA	eGFR	Education(year)	MCI
1	66	female	18	YES	NO	NO	NO	NO	YES	NO	NO	NO	NO	NO	NO	NO	NO	19.9219	0.957895	0.56875	34.32	4.73954	1.47873	28.9401	16.5508	0.0978952	8.44278	0.434926	160	51	91	95	8.5	5.62	4.43	1.04	1.36	2.68	6.4	69.1	278.5	79.27	11	NO
2	71	male	10	YES	YES	NO	NO	NO	YES	NO	NO	NO	NO	NO	NO	YES	YES	26.1224	1.05102	0.588571	138.7	5.17169	1.39761	24.332	21.2005	0.0884387	10.5222	2.08571	175	80	103	98	8.9	12.81	3.62	3.65	1.03	3.18	7.8	80.1	337.8	87.74	11	YES
3	64	female	10	YES	YES	NO	NO	NO	YES	NO	NO	NO	YES	NO	NO	NO	NO	26.1752	0.960784	0.586826	63.2	5.13303	1.35987	29.2635	19.1968	0.0860217	9.12116	1.04178	167	73	98	102	7	7.29	3.77	1.58	0.89	2.59	6.3	92.5	422.3	56.54	11	YES
4	60	female	10	NO	YES	NO	NO	NO	NO	NO	NO	YES	YES	NO	NO	NO	NO	29.1363	0.970874	0.645161	68.04	6.49018	1.36518	35.3752	19.9937	0.084829	9.22652	1.17434	155	70	100	103	8.3	7.9	3.25	1.62	0.89	1.97	8.2	36.6	307.6	112.35	9	NO
5	64	male	4	YES	NO	YES	NO	NO	NO	NO	NO	NO	NO	NO	NO	NO	NO	23.4795	0.879121	0.481928	30.45	3.02613	1.17562	24.548	12.7153	0.0757258	10.2202	0.714097	166	64.7	80	91	10.9	17.03	6.41	2.03	1.37	4.61	5.2	56.9	247.7	103.23	6	NO
6	64	male	20	YES	YES	NO	NO	NO	NO	NO	NO	NO	YES	NO	NO	NO	NO	24.8971	0.918367	0.508475	30.25	3.51913	1.24381	23.6166	16.1552	0.0793397	9.61127	0.64089	177	78	90	98	9.6	15.54	4.28	1.21	0.96	2.95	7.7	69.6	374.9	95.03	9	YES
7	61	male	0.42	NO	NO	NO	NO	NO	NO	NO	NO	YES	NO	NO	NO	NO	NO	24.4898	0.877778	0.451429	12.32	2.49311	1.10711	20.8763	12.3973	0.0708138	8.07979	0.374771	175	75	79	90	5.9	4.62	3.85	0.88	1.06	2.62	4.4	73.7	302.2	94.8	9	NO
8	68	male	24	YES	YES	NO	NO	NO	NO	NO	NO	NO	YES	NO	NO	YES	NO	24.5779	0.905263	0.485876	16.38	3.09773	1.19623	22.3426	14.7353	0.0764685	8.35302	0.232505	177	77	86	95	5.8	6.85	5.51	0.78	1.63	3.45	4.9	61.1	242.8	97.48	6	NO
9	65	male	4	YES	NO	NO	NO	NO	NO	NO	YES	NO	NO	NO	NO	NO	NO	32.1767	0.923077	0.568047	27.59	4.7245	1.19435	29.3373	18.3872	0.0729961	8.76677	0.468113	169	91.9	96	104	9.3	9.08	3.32	0.89	1.08	2.08	5.1	74.8	231.2	91.61	9	NO
10	86	male	13	YES	YES	YES	NO	NO	YES	NO	NO	NO	NO	NO	NO	NO	NO	24.2215	0.956989	0.523529	32.88	3.81078	1.27244	23.9575	15.8308	0.081539	8.56896	0.583118	170	70	89	93	7.4	4.84	4.74	1.37	1.23	3.05	13.1	98.1	329.3	59.83	9	NO
11	62	male	2	YES	YES	NO	NO	NO	YES	NO	NO	NO	YES	NO	NO	NO	NO	27.1972	1.05618	0.552941	36.83	4.40583	1.26828	22.1529	17.6545	0.0797175	8.54549	0.702235	170	78.6	94	89	5.7	5.1	3.26	1.27	1	2.12	5.5	64.6	391.4	99.37	6	YES
12	71	female	0.17	NO	NO	NO	NO	NO	NO	NO	NO	NO	YES	NO	NO	NO	NO	23.1473	0.795455	0.434783	13.8	2.2172	1.05198	25.0768	9.5732	0.0679233	8.84383	0.47619	161	60	70	88	10.8	7.59	4.97	1.15	1.05	3.45	4.6	46.9	264.3	95.84	9	NO
13	69	male	0.25	NO	NO	NO	NO	NO	NO	NO	NO	NO	NO	NO	NO	NO	NO	20.3007	0.904255	0.480226	13.4	2.99545	1.30092	21.9179	14.3933	0.0858536	7.89812	0.245612	177	63.6	85	94	12.1	5.06	5.33	0.67	1.31	3.49	8.1	65.9	373.3	93.84	15	NO
14	78	female	0.5	NO	NO	NO	NO	NO	NO	NO	NO	NO	YES	NO	NO	NO	NO	24.5617	0.809524	0.459459	11.4	2.63001	1.03472	28.6538	9.0688	0.0661514	9.63083	0.429331	148	53.8	68	84	11	16.82	4.78	1.14	1.22	3.16	6.6	41.6	160.2	94.88	9	NO
15	63	female	15	YES	YES	YES	YES	NO	NO	NO	YES	NO	NO	NO	NO	NO	NO	22.3518	0.879121	0.544218	77.88	4.22584	1.28041	33.0582	12.7153	0.0831553	9.67124	2.29349	147	48.3	80	91	6.8	5.64	4.36	3.54	0.84	2.88	6.8	80.8	296.4	67.01	9	NO
16	65	female	20	YES	NO	YES	YES	NO	NO	NO	NO	NO	NO	NO	NO	YES	NO	23.3399	0.936842	0.570513	47.74	4.77735	1.35317	30.757	15.8168	0.0872492	8.68799	0.836752	156	56.8	89	95	6.4	4.85	5.03	1.54	1.05	3.36	3.5	60.9	290.1	91.71	15	NO
17	73	male	16	YES	YES	YES	NO	YES	YES	YES	YES	NO	YES	NO	NO	NO	NO	34.1536	1.10476	0.613757	127.5	5.74295	1.32459	22.4107	26.8273	0.080156	9.65021	1.26809	189	122	116	105	7.6	7.82	5.86	2.5	1.21	4.26	5	74.8	311.8	86.61	6	YES
18	63	female	6	NO	NO	NO	NO	NO	NO	NO	NO	NO	YES	NO	NO	NO	NO	29.0943	0.936364	0.668831	93.15	7.0791	1.41171	39.5588	21.1837	0.0877415	9.61305	1.10758	154	69	103	110	7.5	9.1	6.73	2.07	1.25	4.91	4.4	64.8	282.6	87.5	6	YES
19	62	female	0	NO	NO	NO	NO	NO	NO	NO	NO	NO	YES	NO	NO	NO	NO	22.5466	1.07955	0.597484	68.82	5.37102	1.45565	25.8922	18.0157	0.0943999	9.70024	0.716981	159	57	95	88	8.9	11.05	5.7	1.86	1.55	3.61	2.7	47	153.4	102	9	YES
20	65	male	20	YES	YES	NO	NO	NO	YES	NO	NO	NO	NO	NO	NO	NO	YES	30.8979	1.03	0.575419	76.76	4.88323	1.27063	23.7562	21.2117	0.0781852	10.2522	0.830247	179	99	103	100	6.3	17.67	7.21	2.02	1.4	5.07	5.3	64.6	339.8	97.33	11	YES
21	69	male	10	YES	NO	YES	NO	NO	NO	NO	NO	NO	NO	NO	NO	NO	NO	26.5723	0.930481	0.533742	44.66	4.01361	1.21279	26.9294	15.1084	0.0765254	9.29924	0.984997	163	70.6	87	93.5	8.6	6.78	5.27	2.03	1.1	3.51	4.4	61.2	264.4	96.73	6	NO
22	62	male	22	YES	YES	YES	NO	NO	YES	NO	NO	NO	NO	NO	NO	NO	NO	29.1016	0.954545	0.65625	41.2	6.76331	1.41171	36.3516	22.0325	0.0877375	9.42743	0.598175	160	74.5	105	110	8.9	15.19	4.94	1.03	1.13	3.2	9	75.5	294.2	93.21	6	NO
23	72	male	10	YES	YES	NO	NO	NO	NO	NO	NO	YES	YES	NO	NO	YES	NO	27.3982	0.946237	0.508671	70.15	3.52287	1.17266	22.8709	15.4705	0.0736171	10.0829	1.89201	173	82	88	93	8.4	9.88	4.24	3.05	0.82	2.67	7.6	85.2	242	78.28	6	YES
24	70	male	3	YES	YES	YES	NO	NO	YES	NO	NO	NO	YES	NO	NO	NO	NO	24.1115	0.934783	0.494253	27.93	3.25165	1.21811	22.0833	14.7668	0.0781162	9.26099	1.26415	174	73	86	92	7.1	9.96	2.56	1.33	0.52	1.72	3	73.8	307.1	88.96	0	YES
25	70	male	17	YES	YES	YES	NO	NO	NO	NO	YES	NO	YES	NO	NO	NO	NO	22.46	0.880208	0.485632	18.33	3.0933	1.24008	23.8261	14.1879	0.0804714	8.28117	0.42663	174	68	84.5	96	8.9	5.29	3.88	0.94	1.07	2.42	4.4	57.9	299.3	98.27	9	NO
26	69	female	2	YES	NO	NO	NO	NO	NO	NO	NO	NO	YES	NO	NO	NO	NO	25	0.903409	0.496875	24.08	3.30038	1.15322	25.4813	12.5899	0.0735101	8.3716	0.625281	160	64	79.5	88	8.1	4.86	4.21	1.12	0.89	2.8	4	44.5	289.6	98.85	9	NO
27	67	female	10	YES	YES	YES	NO	NO	YES	NO	NO	NO	NO	NO	NO	NO	NO	24.1288	0.881443	0.537736	53.075	4.09401	1.26641	30.3811	14.5279	0.081204	9.2203	0.586345	159	61	85.5	97	9.5	6.59	6.62	1.93	1.77	4.4	5.5	52.1	293.8	95.18	11	YES
28	67	female	15	YES	YES	NO	NO	NO	YES	NO	YES	NO	YES	NO	NO	NO	NO	20.3244	0.837209	0.441718	19.04	2.33086	1.14763	23.3254	10.2308	0.0757227	9.63937	0.373128	163	54	72	86	12.4	14.22	4.91	1.36	1.61	3.18	5.5	36.9	147.9	106.62	9	NO
29	85	female	15	YES	YES	NO	NO	NO	YES	NO	NO	NO	YES	NO	NO	NO	NO	21.436	0.941176	0.516129	21.56	3.66632	1.27329	26.0475	12.7825	0.0832712	8.85758	0.516129	155	51.5	80	85	8.4	9.03	3.51	0.98	0.98	2.31	4.4	64.7	102.7	75.11	6	NO
30	68	male	2	YES	YES	NO	NO	NO	YES	YES	YES	NO	YES	NO	NO	YES	YES	29.7339	0.92233	0.582822	28.8	5.04477	1.25192	31.4944	18.0052	0.0775286	8.39599	0.482336	163	79	95	103	5.7	5.81	3.8	0.96	1.16	2.16	5.6	97.9	316.5	68.04	11	NO
31	63	female	7	YES	YES	NO	NO	NO	NO	NO	YES	NO	YES	NO	NO	NO	NO	28.3987	0.863636	0.605096	18.87	5.54369	1.30526	37.9169	17.8925	0.0814532	8.10313	0.246879	157	70	95	110	7.1	8.16	3.39	0.51	1.25	1.98	5.7	42.4	162.5	104.74	9	NO
32	84	male	1	NO	NO	NO	NO	NO	NO	NO	NO	NO	YES	NO	NO	NO	YES	24.9108	1.08125	0.527439	15.265	3.88794	1.24158	20.0912	14.9349	0.0791898	8.1926	0.238523	164	67	86.5	80	10	6.41	3.72	0.71	1.57	2.04	5.8	67.3	314.4	83.71	11	NO
33	66	female	20	YES	YES	NO	NO	NO	YES	YES	YES	YES	YES	NO	NO	NO	NO	30.8596	0.745763	0.536585	27	4.07079	1.13485	38.1845	14.858	0.0698448	8.74889	0.280771	164	83	88	118	10	8.82	5.27	0.9	1.72	3.48	6	68.1	347.7	80.67	9	NO
34	84	female	0	NO	NO	NO	NO	NO	NO	NO	NO	NO	NO	YES	NO	NO	NO	33.4622	0.923077	0.585366	84.36	5.10077	1.1889	31.5185	18.3872	0.0721904	9.82421	0.969785	164	90	96	104	9.9	10.48	5.49	2.22	1.34	3.89	9.6	122	440.1	35.13	15	NO
35	66	male	2	YES	NO	NO	NO	NO	NO	NO	NO	NO	NO	NO	NO	YES	NO	26.9638	1.06111	0.552023	90.28	4.38675	1.28281	21.5524	18.2193	0.0807469	10.0356	1.5415	173	80.7	95.5	90	9.4	9.71	5.27	2.96	1.06	3.64	4.6	54.2	317.1	103.83	16	YES
36	68	male	10	YES	NO	NO	YES	YES	NO	NO	NO	YES	NO	NO	NO	NO	NO	27.5272	0.95	0.530726	25.2	3.95329	1.24162	23.7562	18.0325	0.0778853	8.40648	0.416645	179	88.2	95	100	7.1	6.71	3.16	0.84	1.07	1.87	6.2	75.9	295.1	89.16	6	NO
37	80	female	26	YES	YES	NO	NO	NO	YES	NO	YES	NO	YES	NO	NO	NO	NO	31.6337	1.14583	0.709677	100.36	8.14777	1.4412	31.7478	24.0628	0.0883338	9.50609	1.65021	155	76	110	96	9.7	8.77	3.58	1.93	0.83	2.44	8.5	84.1	290.7	56.66	9	NO
38	60	male	0	NO	NO	NO	NO	NO	NO	NO	NO	NO	NO	NO	YES	NO	NO	30.3019	0.942857	0.596386	29.92	5.34628	1.28062	31.0939	19.5768	0.0790559	8.45894	0.423241	166	83.5	99	105	11.2	6.75	4.75	0.88	1.24	3.14	5.7	66.1	223.1	99.83	11	NO
39	62	male	4	YES	NO	YES	NO	NO	YES	NO	NO	NO	NO	NO	NO	YES	NO	28.7197	0.949495	0.552941	137.75	4.40583	1.2342	26.6644	17.6545	0.0768747	10.4729	2.653	170	83	94	99	7.8	9.37	5.25	4.75	0.99	3.43	8.4	85.5	468	83.65	9	NO
40	67	female	30	YES	YES	NO	NO	NO	YES	NO	NO	NO	NO	NO	NO	NO	NO	25.8926	0.968421	0.573209	25.5	4.83541	1.30929	28.7209	16.9217	0.0829723	8.74851	0.277359	160.5	66.7	92	95	7.7	10.58	4.94	0.75	1.55	2.88	4.3	47.7	220.9	98	6	NO
41	69	female	11	YES	NO	NO	NO	NO	YES	NO	YES	NO	YES	YES	YES	NO	NO	27.1203	0.936842	0.570513	58.28	4.77735	1.25532	30.757	15.8168	0.0789401	10.2508	0.966274	156	66	89	95	9.7	18.96	5.07	1.88	1.11	3.65	6.9	69.3	280	77.35	12	YES
42	76	male	0	YES	YES	YES	NO	NO	YES	NO	NO	NO	NO	YES	YES	NO	NO	23.5883	0.96875	0.560241	23.52	4.55871	1.3635	26.8858	17.2917	0.0877602	8.66735	0.495371	166	65	93	96	8.2	8.71	3.09	0.84	0.95	2.04	5.3	64.7	264.7	90.01	15	NO
43	64	male	16	YES	YES	YES	NO	NO	NO	NO	YES	NO	YES	NO	NO	NO	YES	34.4148	0.964602	0.630058	121.44	6.12596	1.296	31.6603	23.7508	0.0783261	9.6707	1.26931	173	103	109	113	9.3	7.23	7.95	2.76	1.37	5.55	4.6	75	363	92.15	12	YES
44	60	male	6	YES	YES	NO	NO	NO	YES	YES	YES	YES	NO	YES	YES	NO	NO	24.4473	0.918605	0.470238	36.68	2.81762	1.13092	21.4943	12.4477	0.0723578	9.45686	1.48437	168	69	79	86	6.5	6.15	3.27	2.62	0.83	2.07	6.6	80.8	138	90.85	9	YES
45	75	female	20	YES	YES	NO	NO	NO	NO	NO	NO	NO	YES	NO	NO	NO	NO	36.4733	1.11215	0.772727	89.67	9.92879	1.45671	37.989	28.2212	0.0871907	9.18116	0.860537	154	86.5	119	107	8.5	8.32	7.79	1.47	1.32	5.5	9.4	112	368.1	41.51	12	YES
46	67	male	0.25	NO	NO	NO	NO	NO	NO	NO	NO	NO	YES	NO	NO	YES	NO	24.3911	0.867347	0.491329	23.4	3.19763	1.20048	25.0682	14.3317	0.0768379	9.12879	0.684352	173	73	85	98	13.2	9.92	5.05	1.17	0.84	3.76	5.4	68.9	311.9	93.44	12	NO
47	67	male	1	NO	NO	NO	NO	NO	NO	NO	NO	NO	YES	NO	NO	NO	NO	24.677	0.966667	0.524096	27.72	3.82193	1.24707	24.0805	15.1317	0.0796655	10.0687	0.478523	166	68	87	90	10.9	23.58	5.53	1.26	1.38	3.81	6.5	67.2	174.6	94.4	9	YES
48	66	male	0.08	NO	NO	NO	NO	NO	NO	NO	NO	NO	YES	YES	NO	NO	NO	27.7323	0.891089	0.520231	25.75	3.74613	1.19207	26.3866	16.1153	0.0746842	9.1578	0.645588	173	83	90	101	12.4	11.6	3.36	1.03	0.83	2.12	3.9	65.2	248.5	96.25	15	NO
49	65	female	10	YES	NO	NO	YES	NO	NO	NO	NO	NO	YES	NO	NO	NO	NO	23.3492	0.924731	0.52439	121.8	3.82772	1.27501	26.281	14.7577	0.0822044	10.7162	1.96646	164	62.8	86	93	8.7	13.05	5.35	4.35	1.16	3.49	7.1	58.4	339	92.97	15	NO
50	64	male	16	NO	YES	NO	NO	NO	NO	NO	NO	NO	NO	NO	NO	NO	NO	26.1962	0.969388	0.533708	44.1	4.01291	1.27634	23.2664	18.0437	0.0807275	9.01268	0.719771	178	83	95	98	7.7	7.03	4.17	1.47	1.09	2.69	4.6	62.6	234	99.26	12	YES
51	71	male	20	YES	YES	NO	YES	YES	YES	NO	NO	NO	YES	YES	NO	NO	NO	28.3737	0.956989	0.523529	40.32	3.81078	1.17566	23.9575	15.8308	0.0733761	9.17841	1.04706	170	82	89	93	7.4	7.26	2.67	1.68	0.84	1.64	5.4	76.9	344.4	86.84	9	NO
52	69	male	28	YES	YES	NO	NO	YES	YES	NO	NO	NO	YES	YES	NO	NO	NO	21.6128	0.917647	0.464286	6.89	2.71346	1.18757	21.0351	12.1337	0.077559	7.33708	0.238904	168	61	78	85	6.7	3.65	3.71	0.53	1.03	2.4	5.7	68.3	259.7	92.44	0	NO
53	72	male	5	NO	YES	NO	NO	NO	YES	NO	NO	NO	NO	NO	NO	NO	NO	27.5218	0.923077	0.539326	96.1	4.1262	1.25834	25.7929	18.3872	0.0789363	9.80469	1.65536	178	87.2	96	104	7.9	7.36	3.61	3.1	1.01	2.29	6.3	67.7	283.6	90.87	6	YES
54	79	male	16	NO	YES	YES	NO	NO	YES	NO	NO	NO	NO	NO	NO	YES	NO	23.3887	0.879121	0.462428	9.3	2.68123	1.15382	21.9919	12.7153	0.0743698	8.03018	0.34964	173	70	80	91	6.6	6.24	2.12	0.62	0.82	1.16	9	75.1	243	82.89	9	NO
55	71	female	6	YES	NO	YES	NO	NO	NO	NO	NO	NO	YES	NO	NO	NO	NO	29.7442	0.954545	0.640244	120.79	6.37061	1.37924	34.3753	22.0325	0.0854081	9.88082	1.46913	164	80	105	110	7.6	9.58	5.54	2.57	1.12	3.79	3.5	62.2	345.2	86.92	6	YES
56	64	female	13	YES	YES	YES	NO	YES	NO	YES	NO	NO	NO	NO	NO	NO	NO	27.0559	0.796296	0.540881	41.72	4.15777	1.20294	35.8677	14.4532	0.0756761	8.85603	0.639613	159	68.4	86	108	6.7	5.93	4.74	1.49	1.26	3.09	3.9	51.4	233.8	97.66	9	NO
57	74	female	21	YES	NO	YES	NO	NO	YES	NO	NO	NO	YES	NO	NO	NO	NO	27.2932	0.841121	0.566038	17.28	4.68159	1.2534	35.3689	15.9977	0.0787361	8.25716	0.181941	159	69	90	107	7.5	8.99	4.93	0.54	1.68	3.01	6.1	65.2	311.3	80.41	0	NO
58	62	male	5	YES	YES	NO	NO	NO	YES	NO	NO	NO	YES	YES	NO	NO	NO	26.7755	0.941176	0.548571	16.74	4.3153	1.28664	26.0599	18.4068	0.0810825	7.72875	0.235102	175	82	96	102	5.9	5.3	3.8	0.54	1.26	2.38	5.2	70.5	432.3	95.86	9	NO
59	67	male	3	YES	YES	NO	NO	NO	NO	NO	NO	NO	YES	NO	YES	NO	NO	20.1798	0.833333	0.465116	23.4	2.72792	1.24578	24.5577	12.6208	0.0822964	9.17219	0.740389	172	59.7	80	96	8.3	7.77	4.43	1.56	0.98	3.04	7.5	66.4	378	94.88	15	YES
60	66	female	9	YES	YES	YES	NO	NO	NO	NO	NO	NO	YES	NO	YES	NO	NO	27.1809	0.944444	0.618182	161.04	5.84589	1.39733	32.9563	20.7828	0.087838	10.327	2.00225	165	74	102	108	10.4	10.51	6.62	3.66	1.13	4.34	5.7	64.9	277.5	85.6	9	NO
61	84	female	19	YES	NO	YES	NO	NO	YES	NO	NO	NO	YES	NO	NO	NO	NO	21.3908	1.08642	0.556962	24.9	4.48978	1.38872	22.7849	15.4537	0.0908523	8.21545	0.321027	158	53.4	88	81	14.8	5.61	4.68	0.83	1.44	2.88	3.8	53.2	124	83.88	16	NO
62	68	male	12	YES	YES	NO	NO	NO	NO	YES	NO	NO	NO	NO	NO	NO	NO	25.7959	0.875	0.48	19	2.99138	1.14699	23.4681	14.0112	0.0727321	9.12651	0.466019	175	79	84	96	7.9	11.58	3.06	1	1.03	1.79	4.8	58.5	274.9	99.22	16	NO
63	62	male	7	YES	YES	YES	NO	NO	NO	NO	NO	NO	YES	NO	NO	YES	YES	31.1532	0.93913	0.610169	192.64	5.66007	1.33432	30.8358	23.2937	0.0819914	10.3851	3.37476	177	97.6	108	115	7.8	9.1	3.2	4.48	0.81	1.95	3.7	58.5	284.8	103.52	12	YES
64	60	female	1	YES	NO	NO	NO	NO	YES	NO	NO	NO	NO	NO	NO	NO	NO	24.341	0.770833	0.490066	25.76	3.17439	1.11982	33.7375	10.6132	0.0716997	10.1136	1.03817	151	55.5	74	96	11.6	19.3	2.71	1.61	0.76	1.75	5.7	46.7	242	105.87	6	NO
65	75	male	20	YES	YES	NO	NO	NO	NO	NO	YES	YES	YES	YES	NO	NO	NO	24.8591	0.831776	0.526627	12.48	3.87187	1.25973	30.7028	15.6152	0.0803754	8.02883	0.198439	169	71	89	107	7	7.43	3.15	0.52	1.38	1.76	5.7	66.6	281.5	89.55	15	NO
66	64	female	0	NO	NO	NO	NO	NO	NO	NO	NO	NO	YES	NO	NO	NO	NO	23.4236	0.88	0.536585	27.3	4.07079	1.30259	29.614	15.3872	0.083938	8.90727	0.548643	164	63	88	100	13.1	10.22	4.31	0.91	0.89	3.11	4.7	46.7	227.8	100.77	16	YES
67	63	male	5	NO	NO	NO	NO	NO	NO	NO	NO	NO	NO	NO	NO	NO	NO	25.5102	0.979381	0.565476	26.1	4.66963	1.33133	26.5459	18.0472	0.0845784	8.37375	0.403249	168	72	95	97	7.1	6.27	4.93	0.87	1.22	3.43	6.2	65.7	216.4	98	9	NO
68	63	female	0	NO	NO	NO	NO	NO	NO	NO	NO	NO	YES	NO	NO	NO	NO	21.4062	0.9	0.50625	44.85	3.47678	1.26978	26.4695	13.0653	0.0830612	9.41445	0.931309	160	54.8	81	90	7.6	7.92	4.26	1.95	1.06	2.81	4.7	54.8	117.8	96.28	0	YES
69	66	male	15	NO	YES	NO	NO	YES	YES	NO	NO	NO	NO	NO	YES	NO	NO	20.8611	0.897727	0.461988	13.3	2.67362	1.21348	21.354	12.4253	0.0797206	8.70912	0.253693	171	61	79	88	13.6	8.03	4.32	0.95	1.73	2.27	7	73	258	91.89	9	NO
70	74	male	11	NO	NO	NO	NO	NO	YES	NO	NO	NO	NO	YES	NO	NO	NO	26.1752	0.9375	0.538922	18	4.11802	1.24886	26.4833	16.1748	0.0789995	8.3716	0.323353	167	73	90	96	7.5	7.56	3.62	0.72	1.2	2.2	3.7	77.7	300.9	84.66	6	NO
71	66	male	3	YES	NO	NO	NO	YES	YES	NO	YES	NO	YES	YES	NO	NO	YES	35.7513	1.05217	0.699422	90.16	7.87319	1.41153	32.5392	29.2568	0.0847685	9.21015	0.866207	173	107	121	115	10.1	7.82	6.58	1.61	1.3	4.7	7	124.3	611.7	51.72	6	NO
72	72	female	0.5	YES	NO	YES	NO	NO	NO	YES	NO	NO	NO	NO	NO	NO	NO	21.7784	0.891304	0.525641	21.36	3.85238	1.29066	29.2173	13.378	0.0841848	8.26726	0.316095	156	53	82	92	10.6	5.51	5.62	0.89	1.48	3.9	4.1	71.9	162.8	72.44	9	NO
73	68	female	16	NO	YES	NO	NO	NO	YES	YES	YES	NO	YES	NO	NO	NO	NO	26.5095	0.92	0.560976	88.06	4.57421	1.28008	29.614	16.8832	0.0808037	10.2338	1.49786	164	71.3	92	100	11.1	13.53	3.86	2.59	0.97	2.45	9.4	61.6	421.6	89.47	0	YES
74	63	male	13	YES	YES	NO	NO	NO	YES	NO	YES	NO	NO	NO	NO	NO	NO	28.3671	0.961165	0.572254	51.34	4.81482	1.29652	27.2656	19.5908	0.0809224	9.61106	0.807574	173	84.9	99	103	9.7	12.45	3.84	1.51	1.07	2.07	4.7	54.2	354.4	106.06	15	YES
75	65	male	5	YES	YES	NO	NO	NO	NO	NO	NO	NO	NO	NO	NO	NO	NO	23.7387	0.909574	0.508929	18.655	3.5278	1.2421	25.1682	14.5699	0.0798621	8.97077	0.477448	168	67	85.5	94	9.7	10.89	4.12	0.91	0.97	2.77	5.3	67.8	206.1	95.39	15	NO
76	61	female	27	YES	YES	YES	NO	NO	YES	NO	YES	YES	YES	NO	YES	NO	NO	34.2493	0.911504	0.651899	269.1	6.65555	1.28457	38.8975	21.148	0.0776976	11.4011	2.07359	158	85.5	103	113	11.3	18.83	9.31	5.98	1.88	5.01	17.3	178.2	614.1	26.12	6	YES
77	89	male	0	NO	NO	NO	NO	NO	NO	NO	NO	NO	NO	YES	NO	NO	NO	25.301	0.954545	0.583333	33.04	5.056	1.35419	30.0134	17.8463	0.0861487	9.01302	0.734082	162	66.4	94.5	99	12.1	9.23	3.77	1.12	0.89	2.25	10.7	65.4	165.5	81.81	6	YES
78	62	male	1	YES	NO	NO	NO	NO	YES	NO	NO	NO	YES	NO	NO	NO	NO	29.0533	0.962617	0.613095	33.06	5.72763	1.35257	31.1383	21.2068	0.0840851	8.70817	0.517857	168	82	103	107	12.2	8.76	3.61	0.87	1.03	2.04	5.1	48.3	200.4	111.99	9	YES
79	65	female	10	YES	NO	YES	NO	NO	NO	NO	NO	NO	YES	NO	NO	NO	NO	20.082	0.744681	0.44586	30.24	2.39963	1.14372	29.7835	9.3968	0.0756155	9.56159	1.10154	157	49.5	70	94	8.1	7.1	4.23	2.52	1.02	2.34	6.9	69.7	349.1	79	9	YES
80	63	male	8	YES	YES	YES	NO	NO	NO	NO	NO	NO	YES	NO	NO	NO	NO	26.5731	0.901961	0.547619	51.3	4.29567	1.26324	28.8421	16.858	0.0797085	9.25639	0.928997	168	75	92	102	10	6.94	4.11	1.9	1.12	2.36	6.3	99.3	556.1	69.31	9	YES
81	74	female	9	YES	NO	NO	YES	NO	YES	NO	YES	YES	YES	YES	NO	NO	NO	31.2314	1.08796	0.716463	156.485	8.33177	1.50624	33.4231	27.5493	0.092517	9.97247	2.29793	164	84	117.5	108	8.6	10.26	4.5	2.63	0.82	2.79	7.8	68.8	230.8	75.34	6	YES
82	65	male	15	YES	YES	NO	NO	NO	YES	NO	YES	YES	YES	NO	NO	NO	NO	26.0208	1.02222	0.541176	31.59	4.16379	1.26904	22.604	16.9252	0.0803557	9.18466	0.433683	170	75.2	92	90	11.4	10.49	7.03	1.17	1.46	4.31	5	76.2	386	90.92	6	YES
83	80	female	0	NO	NO	NO	NO	NO	NO	NO	NO	NO	YES	YES	YES	NO	NO	33.7778	0.981818	0.72	157.5	8.42839	1.39199	41.8764	23.3252	0.08439	11.0908	2.57727	150	76	108	110	14.7	26.21	6.74	3.15	0.88	2.56	11	96.4	491.7	51.31	12	YES
84	64	female	8	YES	NO	YES	NO	NO	NO	NO	NO	NO	NO	NO	NO	NO	NO	27.5292	0.947368	0.608108	59.84	5.61267	1.29356	34.7632	16.1825	0.0811426	9.16725	1.14865	148	60.3	90	95	7	6.45	3.44	1.87	0.99	1.88	5.9	51.8	324.5	97.39	9	NO
85	64	male	16	YES	YES	NO	NO	NO	NO	NO	NO	NO	YES	NO	NO	NO	NO	26.7299	0.921569	0.543353	49.3	4.20815	1.26818	26.8261	17.6272	0.0799416	9.23732	0.632671	173	80	94	102	6.3	7.61	4.93	1.7	1.46	2.76	6.2	101.7	384.6	66.85	6	YES
86	69	female	7	YES	NO	NO	NO	NO	NO	NO	NO	NO	YES	NO	NO	NO	NO	26.3465	0.967742	0.552147	105.92	4.38933	1.25997	26.6891	16.1937	0.079616	9.88239	1.60316	163	70	90	93	6.9	7.45	5.87	3.31	1.14	3.55	3.1	54.3	439.4	92.59	12	YES
87	72	female	12	NO	NO	NO	NO	NO	NO	NO	YES	NO	YES	NO	NO	NO	NO	28.6215	0.920792	0.607843	113.4	5.60659	1.28933	35.3684	17.2532	0.0803543	10.1849	1.64118	153	67	93	101	8.9	10.3	3.34	3.24	1.2	1.69	5.5	73.3	370.7	70.76	6	NO
88	67	female	5	YES	NO	YES	NO	NO	YES	NO	NO	NO	NO	YES	NO	NO	NO	24.5243	0.955556	0.540881	34.72	4.15777	1.2635	26.8897	14.7808	0.0807982	8.64154	0.421819	159	62	86	90	6.9	5.75	5.33	1.24	1.59	3.04	4.3	50.1	306.6	96.4	6	NO
89	72	male	8	NO	NO	YES	NO	NO	NO	NO	NO	NO	YES	YES	YES	NO	NO	25.0872	0.858491	0.551515	34.06	4.3762	1.29762	32.0127	16.4045	0.0826668	8.76371	0.821006	165	68.3	91	106	6.4	6.15	3.18	1.31	0.88	1.76	6.4	72.1	395.9	88.54	9	NO
90	61	male	2	YES	YES	YES	NO	NO	NO	NO	NO	NO	NO	NO	NO	NO	NO	22.7732	0.922222	0.50303	7.02	3.41581	1.24222	24.4636	13.7437	0.0804242	8.25734	0.128223	165	62	83	90	12.1	12.45	2.99	0.39	1.53	1.32	4.6	56.1	156.7	106.05	9	NO
91	69	female	0	NO	NO	NO	NO	NO	NO	NO	NO	NO	YES	NO	NO	YES	NO	25.9879	0.918367	0.566038	39.68	4.68159	1.28449	30.8799	16.1552	0.0813511	9.10281	0.589821	159	65.7	90	98	10.8	9.12	5.3	1.24	1.19	3.11	3.1	53.3	317.3	93.15	6	NO
92	60	male	23	YES	YES	NO	NO	NO	NO	YES	NO	YES	NO	NO	NO	NO	NO	24.3902	0.90099	0.554878	58.76	4.44619	1.32003	30.0901	16.492	0.0844907	9.48047	1.27962	164	65.6	91	101	7.1	7.3	4.81	2.26	0.98	2.86	6.9	79.5	340.5	92.54	0	NO
93	67	female	20	YES	NO	YES	NO	NO	YES	NO	NO	NO	YES	YES	NO	NO	NO	21.3039	0.804124	0.472727	11.2	2.86158	1.20697	27.7663	11.9153	0.0790155	7.65134	0.191831	165	58	78	97	6.4	4.73	3.69	0.56	1.38	1.89	5	47	287.9	98.46	9	NO
94	69	female	17	YES	YES	NO	NO	NO	NO	NO	YES	NO	NO	NO	YES	NO	NO	25.6319	0.966667	0.54717	72.79	4.28642	1.25027	26.8897	15.1317	0.0793658	9.86654	1.1639	159	64.8	87	90	9.2	9.67	6.39	2.51	1.18	3.88	6.1	44.9	280.8	98.56	15	YES
95	67	male	10	YES	NO	YES	NO	NO	NO	NO	NO	NO	YES	NO	NO	NO	NO	27.6817	0.932692	0.570588	34.56	4.77897	1.29725	28.9202	18.7837	0.0812991	8.83738	1.2083	170	80	97	104	7.7	8.03	3.15	1.08	0.51	2.15	5.7	77.4	172.2	89.06	12	YES
96	69	female	15	YES	NO	NO	NO	NO	YES	NO	NO	NO	NO	YES	NO	NO	NO	27.993	0.941176	0.611465	34.2	5.68994	1.32853	33.8502	18.4068	0.0831039	8.62856	0.462452	157	69	96	102	7.3	7.82	3.75	0.9	1.19	2.36	6.5	62.1	315.9	88.35	6	NO
97	76	female	30	YES	YES	YES	NO	NO	NO	NO	NO	NO	YES	YES	NO	NO	NO	23.8281	0.945652	0.54375	118.32	4.21627	1.29267	27.4577	15.1205	0.0830614	9.98245	2.43791	160	61	87	92	7.9	6.68	5.07	4.08	0.91	2.94	6.3	58.1	429.4	86.2	9	YES
98	63	male	6	YES	YES	NO	NO	NO	NO	NO	YES	NO	YES	NO	NO	NO	NO	31.002	1	0.607143	33.3	5.59053	1.29665	28.8421	20.808	0.0797418	8.59077	0.541018	168	87.5	102	102	12.2	7.53	4.04	0.9	1.01	2.55	6.2	55.6	239.7	104.92	6	NO
99	69	female	8	NO	NO	NO	NO	NO	YES	NO	NO	NO	YES	NO	NO	NO	NO	20.1746	0.874317	0.529801	42.46	3.93486	1.32976	31.3123	12.7074	0.0878481	9.59338	0.798841	151	46	80	91.5	11.4	9.57	3.97	1.93	1.28	2.18	5.1	45.9	307.6	97.85	12	YES
100	75	male	14	YES	YES	NO	NO	NO	NO	YES	YES	NO	NO	YES	NO	NO	NO	30.2422	0.954545	0.617647	88	5.83341	1.34348	31.6271	22.0325	0.0829639	9.88606	1.8614	170	87.4	105	110	11.2	11.25	3.5	2.2	0.73	2.04	8.3	107.9	439.1	57.62	12	YES
101	71	female	1	YES	NO	YES	NO	NO	NO	NO	NO	NO	NO	NO	NO	NO	NO	25.7812	0.949495	0.5875	61.56	5.14794	1.34273	30.9165	17.6545	0.0851527	9.13505	0.965986	160	66	94	99	8.5	6.83	4.47	1.71	1.04	2.62	5.3	52	287.7	92.6	6	NO
102	69	female	6	YES	YES	NO	NO	NO	NO	NO	NO	NO	YES	NO	NO	NO	NO	15.8594	0.804124	0.4875	13.4	3.12736	1.42058	29.9283	11.9153	0.0976886	8.63666	0.272188	160	40.6	78	97	11.3	10.59	3.9	0.67	1.2	2.06	4	50.5	114.7	94.82	6	NO
103	74	male	18	YES	YES	NO	NO	NO	YES	NO	NO	NO	YES	NO	NO	NO	YES	27.4725	0.9	0.494505	16.75	3.25633	1.1677	22.728	16.13	0.0732725	8.07184	0.225387	182	91	90	100	10.1	6.02	4.61	0.67	1.47	2.46	4.4	64.6	163.8	91.33	9	NO
104	65	female	10	NO	YES	NO	NO	NO	NO	YES	YES	NO	YES	NO	NO	NO	NO	33.0579	0.913043	0.636364	108.1	6.27693	1.30432	36.259	21.98	0.0793593	9.32984	1.1997	165	90	105	115	7.5	6.17	6.36	2.3	1.22	3.77	6.9	79.9	417.3	66.98	12	YES
105	71	male	38	YES	YES	YES	NO	NO	NO	NO	NO	NO	YES	NO	NO	NO	NO	29.4108	0.917431	0.584795	79.1	5.08818	1.29367	30.7453	19.9433	0.0802597	10.2006	1.53679	171	86	100	109	9.7	15	3.43	2.26	0.86	1.91	4.8	68.8	358.9	90.92	12	YES
106	65	female	11	NO	YES	YES	NO	NO	NO	YES	YES	NO	NO	NO	NO	NO	NO	26.6406	0.947368	0.5625	38.4	4.60644	1.26469	28.9401	16.1825	0.0797663	8.91879	0.767045	160	68.2	90	95	9	7.84	3.37	1.2	0.88	1.92	7.6	56.7	243.5	93.88	16	NO
107	79	female	0	NO	NO	NO	NO	NO	NO	NO	NO	NO	YES	YES	NO	NO	NO	26.9531	0.932039	0.6	48.26	5.42784	1.34116	32.8929	18.3977	0.0844251	9.3852	0.498039	160	69	96	103	9.3	11.81	6.73	1.27	1.53	4.04	3.4	46	191.1	91.13	0	YES
108	70	female	7	YES	YES	NO	NO	NO	YES	NO	NO	NO	YES	NO	YES	NO	NO	24.6904	0.934783	0.534161	47.32	4.02202	1.2514	27.0349	14.7668	0.0799343	9.03294	0.843676	161	64	86	92	6.9	6.24	3.19	1.69	1.07	1.61	3.9	46.7	292.7	96.61	6	NO
109	62	female	5	YES	NO	NO	YES	NO	NO	NO	NO	NO	YES	NO	NO	NO	NO	27.8921	0.967742	0.555556	45.44	4.46034	1.22834	27.1035	16.1937	0.0768831	8.59023	0.723751	162	73.2	90	93	7.3	4.77	5.22	1.42	1.09	3.24	6.2	74.6	280.9	74.32	12	NO
110	69	female	6	YES	NO	NO	NO	NO	NO	NO	NO	NO	YES	NO	NO	NO	NO	21.7555	0.858586	0.534591	52.92	4.03065	1.3259	31.3787	14.3128	0.0864984	9.65874	0.58211	159	55	85	99	9.7	10.06	6.97	1.96	1.8	4.11	5.7	48.8	126.3	95.93	12	NO
111	71	male	10	YES	NO	NO	NO	NO	YES	NO	NO	NO	YES	YES	NO	NO	NO	25.763	0.96875	0.534483	64.96	4.02847	1.27434	23.8261	17.2917	0.0808247	9.38906	1.67568	174	78	93	96	8.7	6.49	2.38	2.32	0.74	1.19	6.1	75.9	288.4	87.31	9	YES
112	66	male	1	NO	NO	NO	NO	NO	NO	NO	YES	NO	YES	NO	NO	NO	YES	31.9559	1.0283	0.660606	44	6.87194	1.37715	32.0127	23.7557	0.0842656	8.22266	1.13898	165	87	109	106	10.8	4.69	2.54	1	0.58	1.48	4.3	60.9	329.5	98.99	9	NO
113	82	female	17	YES	NO	NO	NO	NO	YES	NO	NO	NO	YES	YES	YES	NO	NO	26.5812	0.941748	0.610063	39.39	5.65761	1.36886	33.3738	18.7928	0.0863687	8.5085	0.598217	159	67.2	97	103	7.5	6.18	4.06	1.01	1.03	2.31	6.2	85.6	370.9	54.69	12	YES
114	63	male	3	YES	NO	NO	NO	NO	NO	NO	NO	NO	YES	NO	YES	NO	NO	27.2509	0.931373	0.568862	69.3	4.74194	1.29196	29.2635	18.0157	0.0811792	9.99354	1.72904	167	76	95	102	8.4	11.93	5.6	2.31	0.76	3.62	5.6	60	254.4	101.72	16	NO
115	70	female	20	YES	YES	YES	NO	YES	YES	NO	NO	NO	YES	YES	YES	NO	NO	31.2386	1.00926	0.694268	65.28	7.73678	1.42792	36.9002	23.7613	0.0877033	8.97436	0.846345	157	77	109	108	10.8	7.77	4.56	1.28	1.05	2.74	5.4	61	399.1	88.49	9	YES
116	68	male	27	NO	NO	NO	YES	NO	YES	NO	NO	NO	YES	NO	YES	NO	NO	21.5139	0.930233	0.479042	11.85	2.97417	1.22446	21.8496	12.7748	0.08003	8.08824	0.248976	167	60	80	86	9.6	5.19	3.81	0.79	1.52	1.98	10.2	78.9	256.8	87.77	12	YES
117	66	male	4	YES	NO	NO	NO	NO	NO	YES	NO	NO	NO	YES	NO	NO	NO	26.2596	0.958333	0.544379	41.31	4.22914	1.26699	25.6959	16.9168	0.0801037	9.14242	0.946477	169	75	92	96	6.6	7.69	3.04	1.53	0.88	1.73	5.2	85.3	461.6	81.54	9	YES
118	68	female	11	YES	NO	NO	NO	NO	YES	NO	NO	NO	NO	NO	NO	YES	NO	25.3906	0.94898	0.58125	43.05	5.01028	1.33863	30.4224	17.2805	0.0851087	8.60164	0.567411	160	65	93	98	6.6	5.57	3.63	1.23	1.26	1.88	3.7	62.8	337.5	87.76	12	NO
119	78	male	25	NO	NO	YES	NO	NO	NO	NO	NO	NO	YES	YES	YES	NO	NO	22.2656	0.888889	0.5	16.2	3.3588	1.22966	26.4695	12.73	0.079911	8.21976	0.55102	160	57	80	90	12.6	4.33	5.51	1.08	0.98	3.64	9.9	150.6	428.3	37.71	15	NO
120	74	female	20	YES	YES	NO	NO	NO	NO	NO	NO	NO	YES	NO	YES	NO	NO	34.8899	1.00913	0.703822	83.475	7.99047	1.36973	37.6627	24.4198	0.0825936	8.45469	1.09713	157	86	110.5	109.5	11.9	3.72	5.66	1.59	1.02	3.64	6	95.9	227.4	50.43	16	YES
121	80	female	14	NO	NO	YES	NO	NO	NO	NO	NO	NO	YES	NO	NO	NO	NO	25.7812	0.989474	0.5875	67.32	5.14794	1.34273	28.9401	17.6713	0.0851527	9.07132	0.871925	160	66	94	95	7.9	5.86	2.99	1.87	1.26	1.34	7.2	74	220.9	66.14	12	NO
122	65	male	13	YES	NO	NO	NO	NO	NO	NO	NO	NO	YES	YES	YES	NO	NO	27.4286	0.990291	0.582857	60.68	5.04554	1.35068	26.4918	20.8073	0.0847772	9.12779	0.885079	175	84	102	103	7.2	7.07	4.61	1.64	1.08	2.65	4.7	58	371.1	101.71	9	YES
123	60	male	17	YES	YES	YES	NO	NO	NO	YES	YES	YES	YES	NO	YES	NO	NO	22.663	0.898876	0.484848	30.45	3.07904	1.20023	23.9918	12.7433	0.0777684	10.1209	0.964944	165	61.7	80	89	10.1	15.42	5.4	2.03	1.02	3.64	6.2	61.7	320.7	102.71	16	NO
124	67	female	20	YES	YES	YES	NO	NO	NO	NO	NO	NO	NO	YES	NO	NO	NO	29.3724	1.00508	0.603659	40.18	5.51092	1.30863	28.8997	19.6018	0.0812058	8.62274	0.477085	164	79	99	98.5	9.2	7.14	3.77	0.98	1.24	2.21	4.5	51.7	244.6	95.42	12	NO
125	76	female	25	YES	YES	YES	NO	NO	NO	NO	NO	NO	NO	NO	NO	NO	NO	29.278	0.962264	0.684564	73.92	7.48284	1.41681	40.2809	20.7968	0.0879657	9.45675	0.766711	149	65	102	106	8.5	9.59	5.4	1.68	1.5	3.18	6.6	54.5	311.8	88.04	15	NO
126	88	female	20	YES	NO	YES	YES	NO	YES	NO	NO	NO	YES	YES	NO	NO	NO	27.4667	0.980198	0.66	60.27	6.85678	1.41501	36.9774	19.5992	0.0887944	9.34895	0.882	150	61.8	99	101	9.9	9.84	4.47	1.47	1.1	2.95	6.8	91.2	295.4	48.59	12	NO
127	65	female	0	NO	NO	NO	NO	NO	NO	NO	NO	NO	NO	NO	NO	NO	NO	28.0742	0.931373	0.605096	113.59	5.54369	1.31279	33.8502	18.0157	0.0820797	10.0354	1.67355	157	69.2	95	102	13	9.36	6.29	3.07	1.11	4.14	5.3	57.1	243	93.67	9	YES
128	67	male	10	YES	NO	YES	NO	NO	NO	NO	NO	NO	YES	NO	NO	YES	NO	32.8964	0.95283	0.573864	100.8	4.84956	1.21777	27.398	20.3845	0.0741536	9.47329	1.98373	176	101.9	101	106	11.1	5.85	3.83	2.8	0.81	2.53	5.8	63.8	223.7	96.47	9	NO
129	61	female	20	NO	YES	YES	NO	NO	YES	NO	NO	NO	YES	YES	NO	NO	NO	28.3531	1.01087	0.596154	15.75	5.34107	1.2829	29.2173	17.2973	0.0800794	7.98772	0.173077	156	69	93	92	8.9	8.24	3.21	0.45	1.55	1.5	4.3	47.9	233.9	102.05	9	NO
130	60	female	6	YES	NO	NO	YES	NO	YES	NO	NO	NO	NO	NO	NO	NO	NO	28.3987	0.958333	0.585987	267.58	5.11448	1.26404	30.8002	16.9168	0.078881	10.9241	5.01274	157	70	92	96	9	8.88	5.66	7.87	0.92	3.1	4.8	46.6	289.9	103.72	12	YES
131	72	male	8	NO	YES	NO	NO	NO	NO	NO	YES	NO	YES	YES	NO	NO	NO	26.1493	0.947368	0.511364	41	3.57442	1.21711	22.6869	16.1825	0.077004	9.13202	0.748782	176	81	90	95	8.9	7.1	4.9	1.64	1.12	3.15	5	68.2	241.7	90.58	6	YES
132	63	male	10	YES	NO	NO	NO	NO	NO	NO	NO	NO	YES	NO	YES	NO	YES	27.6817	0.92268	0.526471	32.585	3.86877	1.19695	25.7621	15.9811	0.0750131	8.70288	0.909358	170	80	89.5	97	7	5.7	2.63	1.33	0.77	1.74	4.4	64.9	319	98.48	12	YES
133	62	female	20	YES	NO	YES	NO	NO	NO	NO	NO	NO	NO	NO	NO	NO	NO	22.1687	0.833333	0.490798	121	3.18784	1.22095	28.1307	12.6208	0.0794029	10.0813	7.29564	163	58.9	80	96	10.2	5.47	3.89	5.5	0.37	2.74	6.1	95.9	319.9	54.88	15	NO
134	73	male	0	NO	NO	NO	NO	NO	NO	NO	NO	NO	NO	NO	NO	NO	NO	22.8625	0.9	0.487952	15.52	3.13562	1.20626	24.0805	13.0653	0.0780455	8.9721	0.335683	166	63	81	90	11.8	10.23	6.03	0.97	1.41	3.91	9.6	71.2	320.3	88.38	12	YES
135	68	female	10	YES	NO	YES	NO	NO	NO	NO	NO	NO	NO	NO	NO	NO	NO	26.3329	0.847619	0.520468	54.56	3.75076	1.21679	28.9564	15.6628	0.0768941	9.73823	1.34709	171	77	89	105	13.2	12.13	4.67	1.76	0.68	3.48	6.4	56.4	430.2	92.08	16	NO
136	70	male	16	YES	NO	NO	YES	NO	YES	NO	NO	NO	NO	NO	NO	NO	YES	24.5915	0.93617	0.508671	23.92	3.52287	1.23777	23.3103	15.4628	0.0791169	8.82181	0.52378	173	73.6	88	94	7.5	8.21	3.15	1.04	1.01	1.92	7.2	68.9	266.2	91.5	12	NO
137	71	male	23	NO	YES	YES	NO	NO	YES	NO	YES	NO	NO	YES	YES	YES	NO	22.8405	0.933333	0.51976	14.388	3.73694	1.28938	25.0932	15.0416	0.0834367	8.02987	0.285868	167	63.7	86.8	93	7.2	5.86	5.02	0.66	1.2	3.5	5.7	73.5	286.5	88.47	16	NO
138	62	male	1	YES	NO	NO	YES	NO	NO	NO	NO	NO	YES	NO	NO	NO	NO	24.9609	0.938144	0.56875	28.6	4.73954	1.32107	29.9283	16.5368	0.0842314	8.70551	0.719109	160	63.9	91	97	10.2	6.91	4.01	1.1	0.87	2.82	7.8	65.4	295.1	98.9	16	NO
139	74	male	1	YES	NO	NO	NO	YES	YES	NO	NO	YES	YES	YES	NO	NO	NO	24.8356	0.978947	0.502703	46.48	3.40963	1.25873	19.7543	17.2952	0.0803243	8.82692	0.851517	185	85	93	95	7.2	5.17	4.87	1.66	0.98	3.49	8.5	97.1	447.9	65.94	16	YES
140	61	female	30	YES	YES	NO	NO	YES	YES	NO	YES	NO	YES	YES	YES	NO	NO	28.4444	0.990654	0.706667	78.24	8.06672	1.4888	40.2434	22.4713	0.0928814	9.84546	1.01041	150	64	106	107	9.5	14.58	3.75	1.63	1.14	2.5	4.9	48.2	257.8	101.86	9	YES
141	70	female	10	YES	YES	YES	NO	NO	NO	NO	NO	NO	NO	NO	NO	NO	NO	23.3203	0.893617	0.525	87.88	3.83973	1.26161	28.446	14.042	0.0813573	10.1967	1.79242	160	59.7	84	94	8.3	9.99	5.76	3.38	0.99	3.89	4.8	55.7	234.7	91.19	12	YES
142	64	female	10	YES	NO	YES	NO	YES	NO	NO	NO	NO	NO	NO	NO	NO	NO	21.5577	0.77551	0.477987	37.98	2.95526	1.19093	30.8799	11.2132	0.0778121	9.64854	0.960527	159	54.5	76	98	11.2	9.25	5.29	2.11	1.05	3.91	6	76.7	317.8	70.87	6	YES
143	61	female	12	YES	NO	NO	YES	NO	NO	NO	NO	NO	YES	YES	NO	NO	NO	26.7698	0.958763	0.567073	67.9	4.70368	1.28769	28.1855	17.2868	0.0811517	9.55912	1.41041	164	72	93	97	9.6	9.2	3.46	1.94	0.78	2.47	5.6	62.3	448	93.08	9	YES
144	66	female	30	YES	NO	NO	YES	NO	YES	NO	NO	NO	YES	NO	NO	NO	NO	21.4509	0.9	0.490909	24.15	3.18989	1.24909	24.4636	13.0653	0.0816795	8.50605	0.370831	165	58.4	81	90	6.9	5.93	4.76	1.05	1.39	3.23	7	69.1	405.9	79.32	15	NO
145	61	male	20	YES	YES	YES	NO	NO	YES	NO	YES	YES	YES	YES	NO	NO	NO	27.5482	0.896226	0.575758	34.5	4.89057	1.29273	32.0127	17.9653	0.0810811	8.93566	0.894758	165	75	95	106	9.8	8.32	3.69	1.15	0.74	2.67	5.7	61.4	337.2	102.21	16	NO
146	75	female	0	NO	NO	NO	NO	NO	NO	NO	NO	NO	YES	NO	NO	NO	NO	24.1889	0.958333	0.571429	56.1	4.79704	1.35251	28.9929	16.9168	0.0866891	9.9323	0.819876	161	62.7	92	96	10.9	15.71	5.37	1.65	1.15	3.8	4.1	43.3	271.3	95.63	12	YES
147	62	male	0	NO	NO	NO	NO	NO	NO	NO	NO	NO	YES	NO	NO	YES	YES	25.8806	1.01075	0.52809	58.29	3.90085	1.27059	21.1609	17.6713	0.0805258	10.0342	0.87005	178	82	94	93	11.4	14.28	6.07	2.01	1.22	4.32	6.4	52.6	204.3	108.13	12	NO
148	67	male	8	YES	NO	NO	NO	NO	YES	YES	NO	NO	YES	NO	NO	YES	NO	26.9896	0.978723	0.541176	15.12	4.16379	1.24606	24.4087	16.9252	0.078421	7.74607	0.233122	170	78	92	94	6.4	5.2	2.83	0.56	1.3	1.53	5.7	52.3	223.3	104.65	16	NO
149	60	male	10	YES	YES	NO	NO	NO	YES	NO	YES	NO	YES	NO	YES	NO	YES	26.7949	0.94898	0.528409	27.16	3.90718	1.24244	23.9717	17.2805	0.0782873	8.46322	0.394274	176	83	93	98	6.1	6.15	4.05	0.97	1.3	2.71	8.5	87.1	410.6	82.97	6	YES
150	74	male	0	NO	YES	NO	NO	NO	NO	NO	NO	NO	NO	NO	NO	YES	NO	17.2963	0.892857	0.443787	10.1	2.36513	1.27267	20.234	11.1933	0.0862612	8.48393	0.240981	169	49.4	75	84	11.7	6.03	6.05	1.01	1.86	3.59	5.2	45.2	270.9	105.78	15	NO
151	85	male	30	YES	NO	NO	YES	NO	YES	YES	NO	NO	NO	NO	NO	NO	NO	18.7889	0.860465	0.435294	9.27	2.22552	1.20124	20.7994	10.8512	0.0803044	8.55996	0.373627	170	54.3	74	86	5.5	6.38	3.76	1.03	1.2	2.29	6	80.2	435.5	76.87	12	NO
152	65	female	12	YES	YES	YES	NO	NO	YES	NO	NO	NO	YES	NO	NO	NO	NO	34.4842	1.0087	0.738854	98.6	8.95199	1.44634	40.4586	26.9113	0.0873833	9.05946	1.18495	157	85	116	115	10	6.37	5.05	1.7	1.06	3.71	8.1	63.6	248.4	88.22	9	YES
153	64	male	15	YES	NO	NO	NO	YES	NO	NO	NO	YES	NO	NO	NO	NO	NO	24.7676	0.964286	0.503106	9.76	3.41724	1.1768	23.1188	13.1157	0.0751305	7.96464	0.21921	161	64.2	81	84	7.9	5.94	5.16	0.61	1.4	3.53	6.4	61.4	181.4	100.09	6	NO
154	64	male	2	YES	NO	NO	NO	NO	YES	NO	NO	NO	NO	NO	NO	NO	NO	22.6562	0.860465	0.4625	9.09	2.68248	1.12759	24.4931	10.8512	0.0730656	8.77285	0.333661	160	58	74	86	11.9	8.05	3.71	1.01	1.4	2.24	5.2	55.7	264	104.14	9	NO
155	64	female	15	YES	NO	YES	NO	NO	YES	NO	YES	NO	YES	NO	NO	NO	NO	31.7657	0.954955	0.670886	114.72	7.13128	1.37269	37.8904	22.4545	0.0840759	10.1911	1.21471	158	79.3	106	111	8.4	14.05	5.11	2.39	1.32	3.16	3	44	551.3	102.77	6	YES
156	70	female	20	YES	NO	YES	NO	NO	NO	YES	YES	NO	YES	YES	NO	NO	NO	23.5101	0.858586	0.524691	25.92	3.83365	1.26359	30.0134	14.3128	0.0813751	8.9249	0.309021	162	61.7	85	99	8	9.86	6.46	0.96	1.63	4.45	5.9	73.2	518.1	71.89	12	NO
157	79	female	20	YES	YES	YES	YES	NO	YES	NO	NO	NO	YES	NO	YES	NO	NO	21.9261	0.930233	0.519481	18.92	3.73148	1.26305	27.0005	12.7748	0.0822915	8.93874	0.50197	154	52	80	86	8.2	11.16	2.7	0.86	0.89	1.65	6.2	61.1	160.2	83.02	6	YES
158	61	female	10	YES	YES	NO	NO	NO	NO	NO	NO	NO	YES	NO	NO	NO	NO	26.6603	0.957447	0.566038	182.4	4.68159	1.26819	28.8848	16.1888	0.0799773	11.0115	2.32116	159	67.4	90	94	9.6	13.38	6.37	5.7	1.39	3.97	6.7	81	366.8	67.76	12	NO
159	86	female	3	YES	NO	NO	NO	NO	NO	NO	YES	NO	NO	YES	YES	NO	NO	22.719	1.02273	0.573248	24	4.83627	1.38252	26.7335	16.1972	0.0895434	8.52962	0.370635	157	56	90	88	8.1	8.5	3.71	0.75	1.16	2.36	2.9	60.1	124.4	79.45	9	NO
160	71	male	10	YES	YES	NO	NO	NO	NO	YES	YES	NO	YES	YES	YES	YES	NO	24.1588	0.994444	0.529586	28.91	3.93057	1.28504	22.965	16.0203	0.0823814	9.65215	0.664799	169	69	89.5	90	11.5	16.6	4.07	1.18	0.94	2.62	15	282.4	538.8	18.51	9	YES
161	62	male	5	YES	NO	NO	NO	NO	YES	NO	NO	NO	NO	NO	NO	NO	NO	17.735	0.823529	0.426829	17.05	2.0891	1.19079	22.4719	9.6425	0.0803752	9.79101	1.14605	164	47.7	70	85	11.5	6.6	2.16	3.41	1.27	2.45	5.7	55.1	234.1	138.88	9	YES
162	64	female	10	YES	YES	NO	NO	NO	YES	NO	NO	NO	NO	NO	NO	NO	NO	22.8329	0.943182	0.525316	35.5	3.84598	1.26778	26.3095	13.7605	0.0820432	9.30925	0.78521	158	57	83	88	8.8	9.79	4.31	1.42	0.95	3.09	6.5	41.1	305.5	105.12	12	YES
163	63	male	18	NO	YES	NO	YES	NO	YES	NO	NO	NO	NO	YES	NO	YES	YES	24.2415	1	0.554217	26.73	4.4324	1.33054	25.0156	16.928	0.0852498	8.73783	0.468953	166	66.8	92	92	9.1	7.93	5.21	0.99	1.17	3.7	4.4	63.5	345	99.38	12	NO
164	62	male	10	YES	NO	NO	NO	NO	YES	YES	YES	NO	YES	NO	NO	NO	NO	25.4694	1.03226	0.548571	56.42	4.3153	1.31922	22.1722	18.4257	0.0838314	9.75512	1.01878	175	78	96	93	11.2	11.93	7.05	1.82	0.98	5.33	5.8	78.5	287.4	91.71	9	YES
165	74	female	0	NO	NO	NO	NO	NO	NO	NO	NO	NO	NO	NO	NO	NO	YES	28.0404	0.945455	0.658228	38.64	6.81254	1.43346	37.3869	21.6068	0.0896428	9.12027	0.35443	158	70	104	110	11.9	13.7	6	0.84	1.56	4.11	5.1	48.5	199.5	92.78	0	NO
166	60	male	18	YES	YES	NO	NO	NO	YES	NO	YES	NO	NO	YES	NO	NO	NO	24.706	0.935484	0.5	53.9	3.3588	1.21735	22.519	15.1128	0.0777516	10.122	1.05603	174	74.8	87	93	10.6	12.79	5.69	2.45	1.16	4.15	6.7	62.5	372.3	102.16	16	YES
167	67	male	12	YES	NO	NO	NO	NO	YES	NO	NO	NO	NO	NO	NO	NO	NO	23.5294	1.03333	0.547059	26.04	4.28414	1.34905	22.604	17.2917	0.0868663	9.19017	0.541239	170	68	93	90	11.5	13.27	4.42	0.93	0.94	3.29	7	53.9	171.6	103.36	12	NO
168	67	female	20	YES	NO	NO	NO	NO	YES	NO	NO	NO	NO	NO	NO	NO	NO	21.2306	0.955556	0.544304	33.04	4.2276	1.36227	27.3166	14.7808	0.0892337	8.75672	0.530809	158	53	86	90	7.5	6.78	4.44	1.18	1.21	3.09	5.2	54.9	219.3	93.56	16	NO
169	62	male	1	NO	NO	NO	NO	NO	NO	NO	NO	NO	YES	NO	NO	YES	NO	22.6757	0.888889	0.47619	43.35	2.92314	1.18913	23.3313	12.73	0.077042	9.39862	1.19669	168	64	80	90	11.6	5.26	4.79	2.89	1.15	3.23	5.6	73.6	259.4	94.21	6	NO
170	83	male	3	YES	NO	NO	NO	NO	NO	NO	NO	NO	NO	NO	NO	YES	NO	23.3564	1.01176	0.505882	22.89	3.4698	1.25212	20.3482	14.7913	0.0807241	9.0314	0.530204	170	67.5	86	85	8.3	9.66	4.12	1.09	1.04	2.81	4	59.6	132.6	88.63	12	YES
171	82	female	10	YES	NO	YES	NO	NO	NO	NO	NO	NO	YES	NO	NO	YES	NO	15.4006	0.873239	0.4	7.88	1.67474	1.16421	18.7926	7.6313	0.0804514	9.25886	0.757692	155	37	62	71	5.8	6.71	3.21	1.97	1.04	1.92	3.3	43.3	197.3	91.07	16	YES
172	66	female	27	NO	YES	YES	NO	NO	NO	NO	NO	NO	NO	YES	NO	NO	NO	24.8358	0.903846	0.594937	39.24	5.31373	1.37668	34.3658	17.602	0.0878512	8.86632	0.623539	158	62	94	104	8.9	8.19	3.14	1.09	1.04	1.83	5.1	46.1	342.6	99.79	12	YES
173	73	female	10	YES	NO	YES	NO	NO	NO	NO	NO	NO	YES	NO	NO	NO	NO	26.4381	0.858491	0.575949	29.37	4.89473	1.29173	35.3728	16.4045	0.0815755	8.11884	0.457674	158	66	91	106	6.5	4.75	3.75	0.89	1.12	2.49	3.3	57	258.8	88.6	9	NO
174	72	male	30	YES	YES	NO	NO	YES	NO	NO	NO	NO	YES	NO	NO	YES	NO	28.8828	0.959184	0.580247	21.46	4.98833	1.26074	29.5284	17.6608	0.0784532	8.18442	0.315723	162	75.8	94	98	7.4	6.1	4.51	0.74	1.36	3.05	5.7	83.7	409.8	79.98	6	NO
175	79	male	10	YES	YES	YES	NO	NO	NO	NO	NO	NO	NO	NO	NO	NO	NO	21.3908	0.870968	0.512658	6.88	3.5993	1.27825	28.8271	13.0212	0.0836254	7.23198	0.0938055	158	53.4	81	93	10.2	4.05	4.84	0.43	2.35	2.33	8.2	55.6	217.8	93.8	15	NO
176	61	male	7	YES	YES	YES	NO	NO	NO	NO	NO	NO	YES	NO	NO	YES	NO	23.7891	0.956044	0.54375	25.08	4.21627	1.29373	26.9636	15.1268	0.0831523	8.82049	0.473187	160	60.9	87	91	7.4	7.48	6.31	1.14	1.31	4.51	7.5	62.6	305.3	101.36	9	NO
177	71	female	21	NO	YES	NO	NO	NO	YES	YES	NO	NO	YES	YES	NO	NO	NO	19.052	0.811111	0.450617	12.75	2.47941	1.2055	25.6486	10.4557	0.080403	8.53626	0.225309	162	50	73	90	8	7.55	6.01	0.85	1.7	4.12	5.3	53.9	205.4	91.52	9	NO
178	75	female	20	YES	YES	YES	YES	NO	NO	NO	NO	NO	YES	YES	NO	NO	NO	24.8889	0.924731	0.573333	84	4.8381	1.29129	32.6228	14.7577	0.0823725	9.56091	2.02353	150	56	86	93	6.7	5.96	3.55	3	0.85	2.15	9.1	62.5	322.3	84.02	12	NO
179	72	male	5	YES	NO	NO	NO	NO	NO	NO	NO	NO	NO	NO	YES	YES	NO	24.4956	1.02128	0.578313	69.13	4.94613	1.38117	25.9507	18.4292	0.0883403	9.19842	1.89653	166	67.5	96	94	8.5	5.58	4.3	2.23	0.68	3.01	5.6	69.6	262.3	89.83	12	YES
180	73	male	19	YES	NO	YES	NO	NO	NO	NO	NO	NO	NO	YES	NO	NO	NO	21.0836	0.956522	0.533333	14.49	4.00541	1.36881	25.4072	15.4768	0.0897659	8.26289	0.195349	165	57.4	88	92	6.7	7.75	3.83	0.63	1.72	2.16	6	55.1	339.6	98.2	9	NO
181	67	male	20	YES	NO	NO	NO	NO	YES	NO	NO	NO	YES	YES	NO	NO	NO	26.4915	1.03889	0.563253	30.78	4.6224	1.29353	24.0805	17.4759	0.081662	8.64429	0.715663	166	73	93.5	90	7.2	6.62	3.29	1.08	0.85	2.02	4	57.9	221.5	100.37	6	NO
182	67	female	21	YES	NO	NO	NO	NO	YES	NO	NO	NO	NO	NO	NO	NO	NO	21.7779	0.893617	0.497041	19.5	3.30348	1.27028	24.7856	14.042	0.0828561	8.1962	0.25709	169	62.2	84	94	6.4	6.09	4.65	0.75	1.45	3.13	5	62.4	228.4	89.05	12	NO
183	65	male	10	YES	NO	YES	NO	NO	NO	NO	NO	NO	NO	NO	NO	NO	NO	27.4691	0.990385	0.572222	372.02	4.81413	1.34385	25.065	21.2173	0.0843278	11.0024	6.59065	180	89	103	104	8.8	7.72	5.88	9.79	0.85	3.18	7.3	65.9	390.1	96.51	9	YES
184	71	female	0	NO	NO	NO	NO	NO	NO	NO	NO	NO	YES	NO	NO	NO	NO	21.9076	0.790698	0.433121	5	2.19024	1.06374	25.7169	9.0212	0.0693154	8.78441	0.120984	157	54	68	86	10.8	16.45	5.09	0.5	1.79	3.08	5.9	34	159.2	106.53	15	NO
185	63	female	25	YES	YES	YES	NO	NO	NO	NO	NO	NO	YES	YES	YES	NO	NO	27.7397	0.909091	0.617284	212.52	5.82494	1.36856	35.3482	19.93	0.0857383	10.8826	3.85612	162	72.8	100	110	9.7	13.25	3.85	5.06	0.81	2.51	9.5	76.7	403.5	71.37	12	YES
186	65	male	1	NO	YES	NO	NO	NO	NO	NO	NO	NO	YES	YES	YES	NO	YES	27.6361	0.927835	0.535714	44.75	4.05323	1.21178	26.5459	16.1657	0.0759633	9.83435	1.65333	168	78	90	97	12.5	13.13	3.18	1.79	0.58	2.2	4.9	73.7	256.5	92.17	9	NO
187	74	female	12	YES	NO	NO	NO	NO	YES	NO	NO	NO	NO	YES	NO	NO	NO	37.3007	1.016	0.798742	121.44	10.7106	1.51293	44.3468	32.2552	0.0902181	9.89226	1.25517	159	94.3	127	125	11.2	14.15	4.73	1.76	1.12	3.43	6.6	67.3	61.2	77.37	0	NO
188	76	female	25	YES	YES	YES	NO	NO	YES	NO	NO	NO	YES	YES	NO	NO	NO	31.1951	0.886792	0.562874	117.36	4.61437	1.19481	31.1169	17.5712	0.0734027	10.193	1.97309	167	87	94	106	8.6	10.32	4.23	3.26	0.93	2.88	6.2	63.7	265.2	81.54	9	YES
189	61	male	1	YES	NO	YES	NO	NO	NO	NO	NO	NO	YES	NO	NO	NO	NO	26.7299	0.980583	0.583815	55.8	5.06659	1.36261	27.2656	20.3992	0.0858947	9.37516	0.983601	173	80	101	103	7.7	9.58	3.58	1.55	0.92	2.52	5.7	59.4	413.8	103.59	12	YES
190	61	male	3	NO	NO	NO	NO	NO	NO	NO	NO	NO	YES	NO	NO	NO	NO	35.3903	0.982759	0.682635	44.59	7.43281	1.36044	35.7506	25.9892	0.0818384	9.13782	0.627472	167	98.7	114	116	12.5	12.87	4.14	0.91	0.99	2.92	4	55.9	323.2	106.21	6	YES
191	82	female	10	YES	YES	NO	NO	NO	NO	NO	NO	NO	YES	NO	NO	NO	NO	18.75	0.864198	0.4375	12.12	2.26152	1.17249	22.0226	9.7153	0.0784098	8.50363	0.622359	160	48	70	81	8	6.15	2.86	1.01	0.71	1.88	10	117.4	277.5	37.33	12	NO
192	61	female	20	YES	YES	NO	NO	NO	NO	YES	NO	NO	NO	YES	NO	NO	NO	28.9694	1	0.734694	32	8.83524	1.51834	42.5965	23.328	0.0944362	7.81404	0.333478	147	62.6	108	108	7.2	4.87	4.15	0.64	1.41	2.39	6.2	103.7	388.3	49.91	16	NO
193	67	male	0	NO	NO	NO	NO	NO	NO	NO	NO	NO	NO	NO	NO	NO	NO	24.4898	0.882353	0.514286	87.75	3.63067	1.26126	26.0599	16.0992	0.080674	10.6979	1.32731	175	75	90	102	10.2	15.88	6.96	3.51	1.36	4.42	6.75	69.7	314.5	92.99	16	YES
194	76	female	20	YES	YES	NO	NO	NO	YES	NO	NO	NO	YES	NO	NO	NO	NO	26.2378	0.952381	0.632911	114.66	6.19409	1.42489	34.8693	19.9825	0.090099	8.85402	1.50248	158	65.5	100	105	10	3.23	5.34	2.73	1.15	3.54	8.5	93.9	521.3	51	0	NO
195	70	male	3	YES	YES	NO	NO	NO	YES	YES	NO	NO	NO	NO	YES	NO	NO	22.7244	0.97	0.544944	44.48	4.24071	1.39923	24.1085	18.8117	0.090622	8.83108	0.870657	178	72	97	100	7	6.2	4.35	1.39	0.87	3.11	5.8	74.4	432.1	88.02	12	NO
196	75	female	20	YES	NO	NO	NO	NO	NO	NO	NO	NO	YES	NO	YES	YES	NO	22.0317	1.05814	0.575949	62.7	4.89473	1.41502	25.3025	16.5445	0.0921186	8.46012	1.17667	158	55	91	86	10.8	3.13	3.39	1.9	0.93	2.32	4.1	52.8	297.7	89.59	6	YES
197	67	female	15	YES	NO	NO	NO	NO	NO	NO	NO	NO	YES	NO	NO	NO	NO	22.719	0.945055	0.547771	49	4.29879	1.32108	28.2585	14.7745	0.0855637	9.21647	0.79223	157	56	86	91	6.5	7.24	5.57	1.75	1.21	3.95	6.3	66.9	496	81.86	9	NO
198	75	male	10	YES	YES	NO	NO	NO	NO	YES	YES	YES	YES	NO	NO	NO	NO	21.5243	0.898876	0.484848	7.8	3.07904	1.23156	23.9918	12.7433	0.0804875	8.83391	0.158567	165	58.6	80	89	10.3	16.62	3.06	0.52	1.59	1.61	11.5	108.3	366.7	57.35	12	NO
199	61	female	14	YES	YES	YES	NO	NO	YES	YES	NO	NO	YES	YES	NO	NO	NO	30.1021	1.05102	0.635802	60.75	6.26343	1.35318	29.5284	21.2005	0.0836274	8.85068	0.903509	162	79	103	98	10.8	6.51	4.51	1.35	0.95	3.02	4	61.4	249.3	94.06	6	YES
200	70	male	10	NO	YES	NO	NO	NO	YES	YES	NO	NO	NO	NO	YES	YES	NO	26.4697	0.960784	0.579882	28.38	4.98035	1.34426	28.4269	19.1968	0.0848758	8.50741	0.461758	169	75.6	98	102	10.8	7.25	4.72	0.86	1.08	3.39	7.1	68.3	370.8	91.85	16	NO
201	66	female	0	NO	NO	NO	NO	NO	NO	NO	NO	NO	YES	NO	NO	NO	NO	21.875	1.0119	0.53125	42.66	3.96374	1.31813	23.5049	14.4493	0.0859133	9.9749	0.591109	160	56	85	84	15.5	17.12	6.71	1.58	1.42	4.73	3.8	36.4	221.5	107.9	6	YES
202	68	female	3	NO	YES	NO	NO	NO	YES	NO	NO	YES	YES	YES	NO	NO	NO	32.4619	1.01869	0.717105	109.14	8.34927	1.42361	39.0977	23.7592	0.0868804	9.65941	1.68638	152	75	109	107	12.8	9.22	5.31	2.14	0.91	3.9	4.6	52.3	399.6	94.4	16	NO
203	62	male	18	YES	YES	NO	NO	NO	NO	YES	NO	NO	NO	NO	NO	NO	NO	25.4095	0.92	0.538012	19.17	4.09959	1.28046	26.7204	16.8832	0.0814002	9.01371	0.315693	171	74.3	92	100	7	14.57	3.22	0.71	1.21	1.94	5.3	70.2	251.7	96.04	15	NO
204	68	male	0	NO	NO	NO	NO	NO	NO	NO	NO	NO	NO	NO	NO	NO	NO	24.1762	1	0.483146	11.76	3.04816	1.20273	18.2133	14.792	0.0770955	8.5415	0.265257	178	76.6	86	86	13.3	11.52	3.68	0.56	1.02	2.53	7	54.2	224.6	102.4	9	NO
205	79	female	5	YES	YES	NO	NO	NO	NO	NO	NO	NO	YES	NO	NO	NO	NO	26.6436	0.978022	0.523529	41.23	3.81078	1.21323	23.0552	15.8392	0.0765192	8.78373	0.994706	170	77	89	91	6.8	6.18	2.81	1.33	0.7	1.9	4.4	66.3	410.6	76.07	6	NO
206	61	male	9	NO	YES	YES	NO	NO	NO	NO	NO	NO	NO	NO	NO	NO	NO	25.3302	0.938776	0.554217	92.88	4.4324	1.30163	27.8209	16.9028	0.0827893	10.2113	1.41223	166	69.8	92	98	10.3	9.96	7.4	3.44	1.35	5.47	9.3	72	258.5	95.71	6	NO
207	74	male	30	YES	YES	YES	NO	NO	YES	YES	YES	YES	YES	YES	NO	NO	NO	31.2092	0.913793	0.638554	66.01	6.32974	1.35109	36.237	22.402	0.0829972	9.35623	1.42788	166	86	106	116	8.2	9.05	3.89	1.61	0.72	2.54	18.3	130	550.7	46.3	12	NO
208	75	female	13	YES	NO	NO	NO	NO	NO	NO	NO	NO	YES	NO	YES	NO	NO	35.5556	1.01852	0.733333	35.88	8.7972	1.38187	40.7878	24.1972	0.0830632	7.9644	0.532632	150	80	110	108	7.2	5.25	2.93	0.69	0.95	1.65	8.3	106.2	470.8	44.29	9	NO
209	64	female	4	NO	NO	NO	NO	NO	NO	NO	NO	NO	NO	NO	NO	NO	NO	24.9108	1.05618	0.573171	67.32	4.83459	1.34923	24.3764	17.6545	0.086056	9.92711	1.21799	164	67	94	89	11	13.79	5.57	1.87	0.88	3.98	5.5	44.7	275.9	102.27	12	YES
210	67	male	20	YES	NO	YES	NO	NO	NO	NO	NO	NO	NO	NO	NO	NO	NO	23.6324	0.958333	0.547619	17.28	4.29567	1.33953	26.0867	16.9168	0.086191	8.16247	0.278156	168	66.7	92	96	9.6	6.9	5.09	0.64	1.26	3.44	4.6	66.9	252.2	94.56	6	NO
211	61	male	4	YES	NO	NO	NO	NO	NO	NO	NO	NO	NO	NO	NO	YES	NO	24.2215	0.947368	0.529412	28	3.92711	1.28674	24.8598	16.1825	0.0824552	8.60049	0.463235	170	70	90	95	9.7	6.11	5.69	1.12	1.28	4.14	4.9	69.5	283.5	97.11	15	NO
212	69	male	0	NO	NO	NO	NO	NO	NO	NO	NO	NO	NO	NO	NO	YES	YES	22.7903	0.927835	0.517241	32	3.6879	1.31119	24.2618	16.1657	0.0848791	9.80048	0.624593	174	69	90	97	13.8	17.75	4.59	1.28	1.06	3.48	8.8	71.8	375.3	90.58	9	NO
213	69	female	2	NO	NO	NO	NO	NO	NO	NO	NO	NO	YES	YES	NO	NO	NO	25.5296	0.755102	0.45679	26.56	2.58423	1.05566	29.5284	10.5488	0.067057	9.38681	0.722163	162	67	74	98	7.6	9.05	4.63	1.66	1.05	3.57	4.3	53.5	347	93.04	9	YES
214	62	female	5	YES	NO	NO	NO	NO	YES	NO	NO	NO	YES	NO	NO	NO	NO	21.2183	0.910112	0.503106	23	3.41724	1.27142	25.5664	13.0772	0.083291	8.83248	0.546854	161	55	81	89	7.3	8.63	3.11	1	0.92	1.91	3.2	48.3	231.5	101.05	12	NO
215	60	female	3	YES	NO	NO	NO	NO	NO	NO	NO	NO	YES	NO	NO	NO	NO	23.6874	0.77551	0.47205	20.16	2.84959	1.12906	29.9719	11.2132	0.07262	9.09114	0.345553	161	61.4	76	98	11.3	9.98	4.95	1.12	1.53	3.3	5.8	48.1	222	102.64	12	NO
216	65	male	9	NO	YES	NO	NO	NO	YES	NO	NO	NO	NO	NO	NO	NO	NO	19.2526	0.878049	0.404494	3.71	1.74224	1.12837	16.529	10.298	0.075127	7.92942	0.133989	178	61	72	82	7.3	6.6	4.76	0.53	1.6	2.91	5.1	72.1	267.9	93.03	6	NO
217	65	male	10	YES	NO	NO	NO	NO	NO	NO	NO	NO	YES	YES	YES	YES	NO	18.9069	0.875	0.455621	6.12	2.56427	1.24971	22.0546	11.7733	0.0834578	7.37253	0.159155	169	54	77	88	13.4	3.93	4.65	0.51	1.46	3.14	5.9	54.7	178.3	104.19	12	YES
218	64	male	23	YES	YES	YES	NO	NO	YES	NO	NO	NO	YES	NO	YES	NO	YES	25.6369	0.828283	0.518987	35.19	3.72186	1.18202	31.8482	13.2457	0.0750311	9.58407	0.97664	158	64	82	99	13	8.84	5.63	2.07	1.1	4.16	9.9	123.3	383.7	52.97	12	NO
219	69	male	16	YES	NO	YES	NO	NO	YES	YES	NO	NO	NO	NO	NO	NO	NO	26.0276	0.845	0.491279	23.01	3.1967	1.15864	26.331	14.1123	0.0733618	8.80425	0.616712	172	77	84.5	100	5.8	7.11	4.82	1.18	0.94	3.57	5.3	71.9	448	90.53	9	NO
220	69	female	17	YES	YES	NO	YES	NO	YES	NO	NO	YES	YES	YES	NO	NO	NO	24.2382	1.01087	0.611842	32.55	5.69865	1.40567	31.0933	17.2973	0.0900659	8.38973	0.389735	152	56	93	92	6.9	5.96	4.37	0.93	1.46	2.76	6.5	61.9	399	88.7	9	NO
221	72	male	20	NO	YES	NO	NO	NO	YES	NO	NO	YES	YES	NO	NO	YES	NO	26.1752	1.07527	0.598802	65.1	5.40076	1.38762	25.0932	19.9657	0.0877772	9.38348	0.732745	167	73	100	93	7.7	8.05	5.68	1.86	1.52	3.95	9.2	90.2	315.8	73.07	6	NO
222	71	male	4	YES	NO	YES	NO	NO	NO	YES	NO	NO	NO	NO	NO	YES	NO	23.3729	0.911765	0.528409	22.68	3.90718	1.33028	25.6849	17.2413	0.0857534	8.15476	0.375449	176	72.4	93	102	7.7	5.41	5.63	0.81	1.14	3.97	3.4	65.4	350.9	92.82	12	NO
223	77	male	20	YES	YES	YES	NO	NO	YES	NO	NO	NO	YES	YES	NO	NO	NO	24.6713	0.88	0.517647	41.63	3.69578	1.24663	27.1156	15.3872	0.0796398	9.24603	0.859579	170	71.3	88	100	9.5	7.21	6.66	1.81	1.09	4.87	8.7	76.6	428.9	83.4	12	YES
224	60	male	6	NO	NO	NO	NO	NO	YES	NO	NO	NO	YES	NO	NO	NO	YES	24.5089	0.966667	0.514793	14.08	3.64047	1.24019	22.965	15.1317	0.0793158	7.81609	0.249597	169	70	87	90	6.4	4.88	5.95	0.64	1.32	4.36	4.6	79.5	340.4	92.53	6	NO
225	69	female	15	YES	YES	YES	NO	NO	YES	NO	YES	YES	NO	NO	YES	NO	NO	29.2021	0.901961	0.582278	44.54	5.03283	1.24259	33.3588	16.858	0.0771822	8.92411	0.544846	158	72.9	92	102	8.6	7.22	4.53	1.31	1.4	2.65	3.9	56.1	251.2	91.6	9	NO
226	75	female	11	YES	YES	YES	NO	NO	YES	NO	NO	NO	NO	NO	NO	NO	NO	27.3399	0.989583	0.620915	42.92	5.90986	1.34757	32.7264	18.0493	0.0846278	8.87592	0.692559	153	64	95	96	8.9	7.77	4.47	1.16	1.04	3.18	8.5	70	254.2	73.26	16	YES
227	77	male	9	YES	YES	NO	NO	NO	YES	NO	YES	NO	YES	NO	NO	NO	NO	34.6514	1.01887	0.642857	62.78	6.43403	1.29862	30.679	23.3252	0.0783951	9.12	0.816149	168	97.8	108	106	7.1	7.88	4.7	1.46	1.15	3.19	7.5	105.6	357	58.29	9	NO
228	76	male	0	NO	NO	NO	NO	NO	NO	NO	NO	NO	NO	NO	NO	NO	YES	28.6689	0.990566	0.63253	29.2	6.18497	1.39638	31.5614	22.0493	0.0870017	8.82552	0.398058	166	79	105	106	14.3	11.74	5.83	0.73	1.16	3.81	4.8	57.6	189.7	94.41	6	NO
229	63	female	7	NO	YES	NO	NO	NO	YES	NO	NO	NO	YES	YES	NO	NO	NO	22.2656	0.885417	0.53125	51.03	3.96374	1.30652	29.4342	14.3653	0.0849055	9.07339	1.11563	160	57	85	96	7.4	5.81	3.47	1.89	0.9	2.2	8.2	89.1	384	59.58	16	NO
230	86	male	26	NO	YES	NO	YES	NO	YES	YES	NO	NO	YES	YES	YES	NO	NO	26.2891	1.07317	0.56051	13.34	4.56438	1.25666	23.6835	15.4628	0.0794357	8.39946	0.328379	157	64.8	88	82	14.9	9.65	2.58	0.58	0.99	1.45	7	85.3	339.7	70.89	0	YES
231	63	female	10	YES	YES	NO	NO	NO	YES	NO	NO	NO	YES	NO	YES	NO	NO	28.5483	0.989796	0.602484	26.13	5.4842	1.31263	29.9719	18.8173	0.0818412	8.42619	0.294646	161	74	97	98	8.6	8.58	3.83	0.67	1.37	2.25	7	57.4	292	94.82	9	YES
232	66	male	0	NO	NO	NO	NO	NO	NO	NO	NO	NO	NO	NO	NO	NO	NO	25.9516	0.875	0.494118	13.87	3.24914	1.16024	25.311	14.0112	0.0734986	8.41536	0.252242	170	75	84	96	14	7.79	3.82	0.73	1.43	2.16	6.9	66.9	406	95.26	6	NO
233	64	female	23	YES	YES	NO	NO	NO	NO	NO	NO	NO	NO	NO	NO	NO	NO	29.0732	0.954545	0.660377	50.29	6.86622	1.41683	36.8652	22.0325	0.0880701	8.48184	0.660377	159	73.5	105	110	6.4	5.68	4.75	1.07	1.07	3.13	5.5	77.6	302.6	69.87	12	NO
234	61	male	20	YES	YES	YES	NO	NO	YES	NO	NO	NO	NO	NO	NO	NO	NO	23.4332	0.955556	0.464865	24.78	2.72354	1.19831	17.7672	14.7808	0.0772133	8.76991	0.409359	185	80.2	86	90	7.2	6.87	3.96	1.18	1.34	2.31	7.1	61.6	327.5	102.05	12	NO
235	65	female	22	YES	YES	NO	NO	NO	YES	YES	NO	NO	YES	NO	NO	YES	NO	24.6097	0.923913	0.515152	31.05	3.6474	1.22376	25.4072	14.4157	0.0782118	9.18067	0.592424	165	67	85	92	13.3	10.63	2.99	1.15	1	1.78	5.1	65.5	176.1	85.23	0	NO
236	63	female	2	NO	NO	NO	NO	NO	NO	NO	NO	NO	NO	NO	NO	NO	NO	29.1695	0.925234	0.630573	74.21	6.13825	1.34213	36.3919	19.5572	0.0833807	9.556	1.07673	157	71.9	99	107	9.1	9.83	5.45	1.81	1.06	3.82	4.4	49.1	423	99.84	9	NO
237	65	female	4	NO	NO	YES	NO	NO	YES	NO	NO	NO	NO	NO	NO	NO	NO	32.0312	0.981308	0.65625	64.86	6.76331	1.3456	34.8693	22.0472	0.0823026	9.44253	0.780711	160	82	105	107	9.5	11.51	4.95	1.38	1.16	3.19	4.7	66.5	468.8	83.62	16	NO
238	64	female	18	YES	YES	NO	NO	NO	NO	NO	YES	YES	YES	YES	NO	NO	NO	27.3438	0.959184	0.5875	113.4	5.14794	1.3038	30.4224	17.6608	0.0818771	10.4244	1.49244	160	70	94	98	9	13.46	4.68	3.15	1.24	2.87	4.9	48.5	240.4	99.53	6	YES
239	64	male	10	YES	NO	YES	NO	NO	YES	NO	NO	NO	YES	NO	NO	NO	YES	30.0041	1.01923	0.59887	83.23	5.40229	1.33445	26.1645	22.4692	0.0825148	10.1446	1.19187	177	94	106	104	9	15.79	4.41	2.03	1.02	3.01	3.7	64	307.3	98.34	12	NO
240	76	female	29	YES	YES	NO	NO	NO	NO	NO	NO	NO	YES	NO	NO	NO	NO	27.3438	0.947917	0.56875	34.65	4.73954	1.26219	29.4342	16.5445	0.079264	8.42164	0.364139	160	70	91	96	7.6	5.45	7.26	1.05	1.64	4.96	5.4	49	150.8	91.19	12	NO
241	86	male	18	YES	YES	YES	NO	NO	YES	NO	NO	NO	YES	NO	NO	NO	NO	28.3848	0.989691	0.561404	21.7	4.58325	1.26416	25.3788	18.4313	0.078895	8.06627	0.436647	171	83	96	97	9.1	5.73	3.54	0.7	0.9	2.52	5.4	100.7	305.8	57.95	15	NO
242	73	male	17	YES	NO	YES	YES	NO	NO	NO	NO	NO	YES	NO	NO	NO	YES	18.3655	0.901734	0.472727	7.54	2.86158	1.29995	22.8122	12.1174	0.0872338	7.77538	0.236364	165	50	78	86.5	10.6	5.17	2.67	0.58	1.16	1.37	4.7	58.8	175	95.61	16	NO
243	63	male	4	NO	NO	NO	NO	NO	YES	NO	NO	NO	YES	NO	NO	NO	NO	25.7959	0.907216	0.502857	35.19	3.41255	1.2016	23.9001	15.4313	0.0761956	9.02966	1.05393	175	79	88	97	6.9	6.87	3.89	1.53	0.73	2.67	5	66.3	267.7	97.63	15	NO
244	80	male	22	NO	NO	YES	NO	NO	NO	NO	NO	NO	NO	NO	NO	YES	YES	22.9854	0.94382	0.488372	33.25	3.14332	1.22564	21.4546	14.0945	0.0792283	9.27155	1.12454	172	68	84	89	8.8	7.65	4.26	1.75	0.76	2.92	7.3	100.5	493.7	60.63	12	YES
245	82	female	50	NO	YES	NO	NO	NO	YES	NO	NO	NO	NO	YES	NO	NO	NO	27.6304	0.96875	0.615894	54.25	5.79258	1.32091	33.7375	17.2917	0.0828076	8.96079	1.19329	151	63	93	96	9.4	6.33	3.75	1.55	0.8	2.55	6.1	62.5	282.5	79.96	12	NO
246	66	female	35	YES	YES	YES	NO	NO	NO	NO	NO	NO	YES	NO	NO	NO	NO	24.0882	0.960452	0.521472	32.67	3.77041	1.2445	24.5267	14.4414	0.0798219	9.61832	0.57362	163	64	85	88.5	10.2	15.65	4.65	1.21	1.1	2.92	4.2	52.4	423.4	95.68	0	NO
247	64	male	1	NO	NO	NO	NO	NO	NO	NO	NO	NO	YES	NO	NO	NO	NO	29.7578	0.909953	0.564706	27.59	4.65324	1.23828	29.5969	18.3688	0.0766737	8.33055	0.584405	170	86	96	105.5	9.8	5.87	3.13	0.89	0.86	2.08	5.1	67.5	302.8	96.23	9	NO
248	67	male	20	YES	YES	NO	NO	NO	YES	NO	NO	NO	YES	NO	YES	NO	NO	24.2215	0.967033	0.517647	13.11	3.69578	1.25815	23.0552	15.4817	0.0806228	7.44484	0.421513	170	70	88	91	8.1	3.78	2.73	0.57	0.7	1.77	6.4	66.1	202.9	95.04	9	NO
249	72	female	8	YES	YES	YES	NO	NO	YES	NO	NO	NO	YES	NO	NO	NO	NO	27.9431	0.978947	0.560241	49	4.55871	1.25275	26.4183	17.2952	0.0783873	9.03922	0.761493	166	77	93	95	11	7.58	5.04	1.4	1.03	3.58	3.2	56	235.1	89.76	0	NO
250	67	male	0	NO	NO	NO	NO	NO	NO	NO	NO	NO	YES	NO	NO	NO	NO	25.1559	0.851064	0.47619	12.15	2.92314	1.12899	25.1682	12.6628	0.0718912	8.48008	0.313589	168	71	80	94	8.3	7.49	4.21	0.81	1.23	2.72	6.5	59.6	242.7	99.17	16	NO
251	77	male	3	NO	YES	NO	YES	NO	YES	YES	NO	NO	YES	NO	YES	NO	NO	33.7925	0.970874	0.606061	67.9	5.56575	1.22863	30.5972	19.9937	0.0744809	8.99815	1.58886	165	92	100	103	6.9	5.25	2.7	1.94	0.74	1.64	5	96.4	432.4	65.14	15	YES
252	77	female	30	YES	YES	YES	NO	NO	YES	YES	NO	NO	YES	YES	NO	NO	NO	20.83	0.918605	0.5	21.63	3.3588	1.26336	25.3025	12.4477	0.083018	8.36882	0.338816	158	52	79	86	6.5	5.27	6.54	1.03	1.52	4.75	7.8	103.8	304.8	44.86	12	NO
253	63	male	12	NO	YES	NO	YES	NO	NO	NO	NO	NO	YES	NO	NO	NO	NO	27.0842	0.942105	0.514368	40.18	3.63225	1.19609	23.3904	15.9993	0.0752324	9.09764	1.10995	174	82	89.5	95	8.7	6.86	3.99	1.64	0.76	2.94	4.6	56.8	354.5	104.03	15	YES
254	68	female	20	YES	NO	YES	NO	NO	YES	NO	NO	NO	YES	NO	NO	NO	NO	32.0399	0.980952	0.647799	115.2	6.5547	1.32394	34.3713	21.2152	0.0809739	9.21258	1.90617	159	81	103	105	6.8	4.93	3.97	2.56	0.87	2.89	6.5	64.5	491.4	84.89	12	YES
255	61	female	20	YES	YES	NO	YES	YES	YES	NO	NO	NO	YES	NO	NO	NO	NO	26.6728	0.978261	0.555556	66.88	4.46034	1.2561	26.6185	16.1972	0.0792087	9.59028	0.900086	162	70	90	92	11.5	8.81	4.82	2.09	1.29	3.49	5.3	36.4	375	111.69	16	YES
256	69	male	20	NO	YES	NO	NO	NO	YES	YES	NO	NO	YES	NO	NO	NO	NO	25.0593	0.93617	0.508671	13.8	3.52287	1.22616	23.3103	15.4628	0.0781292	7.40188	0.287927	173	75	88	94	7.3	3.44	2.51	0.6	1.06	1.57	4.7	60.265	270.9	94.39	15	NO
257	62	male	10	YES	YES	NO	NO	NO	YES	YES	YES	NO	YES	NO	NO	NO	NO	27.102	0.962567	0.514286	36.75	3.63067	1.19894	22.3882	16.1914	0.075403	9.2463	0.933333	175	83	90	93.5	8.2	8.88	4.53	1.47	0.81	3.34	5.2	69.3	290.9	96.55	9	YES
258	62	male	20	YES	YES	NO	NO	NO	YES	NO	NO	NO	NO	NO	NO	NO	NO	27.6817	0.936842	0.523529	21.84	3.81078	1.19026	24.8598	15.8168	0.074594	8.12194	0.541377	170	80	89	95	9.3	4.66	5.32	0.91	0.88	3.86	5	53	204.7	107.8	16	NO
259	71	male	5	YES	NO	YES	NO	NO	NO	NO	NO	NO	YES	YES	NO	NO	NO	29.0657	1.0098	0.605882	27.74	5.56167	1.3443	28.0179	21.2173	0.0835651	8.31413	0.337629	170	84	103	102	7.6	7.04	3	0.73	1.31	1.89	6.2	65.1	211.2	93.01	9	NO
260	62	female	6	NO	YES	NO	NO	NO	NO	NO	NO	NO	YES	NO	NO	NO	NO	33.2479	0.990909	0.689873	179.01	7.62132	1.37972	37.3869	23.7613	0.0838665	10.1433	1.78048	158	83	109	110	8.6	9.12	5.23	3.51	1.36	3.38	8.3	103	440.2	50.32	16	NO
261	70	female	12	NO	YES	NO	NO	NO	NO	NO	NO	NO	YES	NO	NO	NO	NO	24.974	1.0814	0.6	59.5	5.42784	1.37134	26.5657	17.2637	0.0874296	9.88201	0.761194	155	60	93	86	12.3	14.5	3.74	1.7	1.34	2.38	6.4	62	220.9	87.82	15	NO
262	65	female	13	NO	YES	YES	NO	NO	NO	NO	NO	NO	NO	NO	NO	NO	NO	19.5312	0.864198	0.4375	57.36	2.26152	1.14881	22.0226	9.7153	0.0763047	10.1876	1.95444	160	50	70	81	9.3	7	4.52	4.78	1.07	2.8	6.5	66	565.2	84.39	12	NO
263	73	male	10	YES	YES	NO	NO	NO	YES	NO	YES	NO	YES	YES	NO	NO	NO	30.4218	1.06	0.616279	104.14	5.80153	1.34438	26.331	22.4468	0.0829376	9.92884	1.75882	172	90	106	100	10.1	10.17	5.26	2.54	0.89	3.81	5.5	77.9	463.8	85.17	12	YES
264	76	female	8	YES	YES	YES	NO	NO	YES	NO	NO	NO	YES	YES	YES	NO	NO	22.7694	0.965909	0.551948	48.6	4.38519	1.31691	28.047	14.4437	0.0852623	8.65878	0.827922	154	54	85	88	6.5	4.03	4.94	1.8	1.2	3.29	5.7	62.3	417.6	83.76	12	YES
265	70	female	20	NO	YES	NO	NO	NO	NO	NO	NO	NO	NO	NO	NO	YES	NO	25.5178	0.951351	0.564103	45.3	4.64042	1.2796	29.4739	15.4738	0.0812878	8.94876	1.41966	156	62.1	88	92.5	9.7	6.42	3.39	1.51	0.6	2.21	6.2	56.5	229	90.74	6	YES
266	71	female	15	YES	YES	NO	NO	NO	YES	YES	YES	NO	NO	NO	NO	NO	NO	27.6398	0.935323	0.594937	63	5.31373	1.30498	32.6035	17.6424	0.0818043	9.11784	1.21063	158	69	94	100.5	7.1	6.56	4.36	1.75	0.86	3.17	8	79.8	323.5	64.31	12	YES
267	70	male	20	YES	NO	YES	NO	NO	NO	NO	NO	NO	YES	YES	NO	YES	NO	25.7785	0.936842	0.523529	14.4	3.81078	1.23342	24.8598	15.8168	0.0782216	8.54224	0.239784	170	74.5	89	95	8.3	10.76	2.84	0.6	1.31	1.65	4.7	84.6	381.7	80.07	16	NO
268	78	male	20	YES	YES	NO	YES	NO	YES	NO	NO	NO	YES	YES	NO	NO	NO	24.2215	0.93617	0.517647	15.41	3.69578	1.25815	24.4087	15.4628	0.0806228	8.10773	0.444646	170	70	88	94	7.4	6.24	3.11	0.67	0.78	2.09	5.1	78.1	353.3	82.15	6	NO
269	69	male	2	NO	NO	NO	NO	NO	YES	YES	NO	NO	YES	NO	NO	NO	NO	25.2493	0.956989	0.5	25.2	3.3588	1.21795	21.1609	15.8308	0.077508	8.35722	0.541237	178	80	89	93	5.9	5.11	3.69	1.05	0.97	2.48	5.2	66.3	233.8	93.6	12	YES
270	72	female	10	YES	YES	YES	NO	NO	NO	NO	NO	NO	YES	NO	YES	NO	NO	29.7778	1.07143	0.7	39.01	7.88856	1.44136	35.3444	22.0157	0.0892378	8.32348	0.492373	150	67	105	98	7.5	6.25	3.66	0.83	1.18	2.33	4.3	52.5	239.8	91.67	12	NO
271	79	male	2	YES	YES	NO	NO	NO	YES	NO	NO	NO	NO	YES	NO	YES	NO	25.2595	0.946237	0.517647	23.23	3.69578	1.23202	23.9575	15.4705	0.0783986	8.1388	0.580915	170	73	88	93	11.2	4.27	3.71	1.01	0.9	2.39	5.2	94.1	174.3	66.07	9	YES
272	75	male	2	NO	NO	NO	NO	NO	NO	NO	NO	NO	NO	NO	NO	YES	NO	19.01	0.855491	0.444444	9.9	2.37606	1.20672	22.2619	10.8426	0.0805137	8.21474	0.373198	166.5	52.7	74	86.5	10.1	4.23	3.75	1.1	1.31	2.09	8.6	85.2	300	76.65	9	NO
273	78	male	1	NO	NO	YES	NO	NO	YES	NO	NO	NO	YES	YES	YES	NO	NO	22.4913	0.977273	0.505882	19.95	3.4698	1.27597	21.7017	14.7892	0.0827809	8.44402	0.444989	170	65	86	88	11.3	6.16	3.26	0.95	1.08	1.96	14.7	123.4	240.9	47.96	12	NO
274	73	female	10	YES	YES	YES	NO	NO	YES	NO	YES	NO	YES	YES	YES	NO	NO	34.8944	0.92	0.69697	59.85	7.80816	1.39044	40.9772	26.38	0.0838402	9.12845	1.2197	165	95	115	125	8.7	11.05	2.78	1.05	0.6	1.86	3.3	68.1	194.4	76.87	16	NO
275	75	male	20	YES	YES	YES	NO	NO	YES	NO	NO	NO	NO	NO	YES	NO	NO	19.721	0.847059	0.431138	7.28	2.15819	1.15102	21.3862	10.2497	0.0763287	8.24033	0.400342	167	55	72	85	6.8	4.59	4.93	1.04	1.12	3.37	4.3	67.3	365.9	89.18	0	NO
276	64	male	13	NO	YES	NO	NO	NO	NO	NO	YES	YES	YES	NO	NO	NO	YES	23.7022	0.917431	0.537634	117.6	4.09196	1.38173	24.9692	19.9433	0.0888624	9.92909	2.15054	186	82	100	109	7.7	7.69	3.47	3.36	0.84	2.15	7.3	95	363.8	72.58	12	YES
277	70	male	20	YES	YES	NO	NO	NO	NO	NO	YES	NO	YES	NO	NO	NO	NO	25.0995	1	0.568862	27	4.74194	1.34619	26.0199	18.05	0.0857542	8.57605	0.632069	167	70	95	95	12.7	7.42	4.1	0.9	0.81	2.81	18.7	159.3	463.3	37.26	12	NO
278	82	female	16	NO	YES	YES	NO	NO	YES	YES	NO	NO	YES	YES	NO	NO	NO	23.8751	0.926316	0.533333	69	4.00541	1.2863	26.8227	15.4537	0.0826248	9.79252	1.07602	165	65	88	95	8.4	9.8	4.43	2.3	1.14	2.94	8.1	138.9	441.3	30.45	9	YES
279	62	male	10	YES	YES	NO	YES	NO	NO	NO	NO	NO	YES	NO	NO	NO	NO	22.4913	1.03488	0.523529	25.68	3.81078	1.32048	20.7994	15.8357	0.0856686	9.2189	0.378498	170	65	89	86	10.9	11.87	5.21	1.07	1.48	3.31	4.2	52.3	220.8	108.39	12	NO
280	67	female	14	YES	NO	YES	NO	NO	NO	NO	YES	NO	YES	NO	NO	NO	NO	29.3848	1.11579	0.642424	51.84	6.42351	1.39661	26.8227	22.3873	0.0866594	8.69005	0.265831	165	80	106	95	6.4	6.93	4.01	1.08	2.61	0.32	7	71.4	331.6	75.71	9	YES
281	63	male	27	YES	YES	NO	NO	NO	NO	NO	YES	YES	NO	NO	NO	YES	NO	21.4692	0.988372	0.488506	18	3.14576	1.27588	19.4692	14.4493	0.0834195	8.08038	0.646552	174	65	85	86	6.9	4.52	3.39	0.9	0.68	2.33	9.1	61.5	216.1	100.69	16	NO
282	64	male	11	YES	YES	NO	NO	NO	NO	YES	YES	NO	YES	NO	NO	NO	NO	27.6817	0.947368	0.529412	33.5	3.92711	1.20364	24.8598	16.1825	0.0754322	9.02659	0.875817	170	80	90	95	8.8	7.82	4.3	1.34	0.81	2.97	7.5	61.8	338	99.76	12	NO
283	66	male	14	YES	YES	NO	NO	NO	YES	NO	NO	NO	NO	NO	NO	NO	NO	19.2894	0.930233	0.496894	13.2	3.30074	1.31702	24.0978	12.7748	0.0876593	8.01727	0.319173	161	50	80	86	12.1	4.34	5.85	0.88	1.37	3.62	8.8	77.5	360.2	89.65	12	NO
284	80	female	30	YES	YES	NO	NO	NO	YES	NO	NO	NO	YES	YES	NO	NO	NO	29.1363	1.11538	0.748387	189.08	9.22221	1.58361	35.8934	26.8112	0.0984016	10.1218	2.9753	155	70	116	104	8.6	9.61	5.19	3.26	0.82	3.55	11.7	97.9	560.9	47.15	12	YES
285	70	male	20	YES	YES	NO	NO	NO	NO	NO	NO	NO	NO	NO	NO	NO	NO	21.3068	0.909091	0.454545	16.65	2.54595	1.19853	19.6889	12.7552	0.0784611	8.69113	0.438735	176	66	80	88	6.9	6.75	3.83	1.11	1.15	2.35	5.9	83.1	252.6	81.82	11	NO
286	60	male	15	YES	YES	NO	NO	NO	YES	NO	YES	NO	YES	YES	YES	NO	NO	31.5617	0.990654	0.595506	188.6	5.3265	1.29745	27.0561	22.4713	0.0795529	10.0359	3.2611	178	100	106	107	6.7	6.25	3.45	4.6	0.84	2.03	4.8	63.1	378.2	101.76	16	YES
287	70	male	20	YES	YES	NO	NO	NO	NO	NO	YES	NO	YES	NO	NO	NO	NO	21.4844	0.860215	0.5	17.85	3.3588	1.25182	27.9518	12.6817	0.0818367	8.78993	0.74375	160	55	80	93	8.4	6.95	4.87	1.19	0.8	3.43	7.7	88.5	462.3	75.82	9	NO
288	76	female	5	NO	YES	NO	NO	NO	YES	NO	NO	NO	YES	NO	YES	NO	NO	26.0375	0.893204	0.582278	97.24	5.03283	1.31593	33.8623	16.8433	0.0833156	9.73358	1.2616	158	65	92	103	9.4	7.43	6.24	2.86	1.32	3.94	6.6	59.6	362.4	85.47	9	NO
289	63	female	10	YES	NO	NO	NO	NO	NO	YES	YES	NO	YES	NO	NO	NO	NO	27.2392	0.941489	0.560127	138.775	4.5563	1.23763	29.3306	15.6433	0.0777711	10.7695	2.17827	158	68	88.5	94	8.1	13.16	5.93	4.55	1.17	3.84	4.5	57	223.2	95.06	15	YES
290	83	male	20	YES	YES	NO	YES	NO	YES	NO	NO	NO	YES	NO	YES	NO	NO	20.8325	0.971751	0.534161	35.91	4.02202	1.36235	25.3216	14.7876	0.0895208	9.27169	0.895506	161	54	86	88.5	11.1	7.83	5.3	1.71	1.02	3.74	10.7	80	363.6	78.53	15	NO
291	77	female	29	NO	YES	YES	NO	NO	NO	NO	YES	YES	YES	YES	YES	NO	NO	25.9695	0.978947	0.611842	46.55	5.69865	1.35801	32.6942	17.2952	0.0860172	9.27197	0.713816	152	60	93	95	9.4	10.07	4.64	1.33	1.14	3.01	16.9	194.2	422.8	21.04	9	NO
292	69	male	12	YES	YES	YES	NO	NO	YES	NO	YES	NO	YES	NO	NO	YES	NO	31.1791	1.02857	0.642857	75.68	6.43403	1.36902	30.2198	23.3217	0.0841123	9.02257	1.00126	168	88	108	105	6.5	5.93	4.62	1.76	1.13	3.26	7	100.5	188.2	65.48	9	NO
293	66	female	27	YES	YES	YES	NO	NO	YES	NO	NO	NO	YES	NO	YES	YES	NO	27.6888	0.979167	0.591195	32.4	5.23004	1.29972	29.8824	17.6692	0.0814504	9.35441	0.532075	159	70	94	96	9.7	16.16	3.02	0.9	1	1.67	4.7	61.5	208	90.75	9	YES
294	76	female	30	YES	YES	NO	NO	NO	NO	NO	NO	NO	YES	YES	NO	NO	NO	22.719	0.955556	0.547771	83.72	4.29879	1.32108	27.7502	14.7808	0.0855637	10.4123	1.72404	157	56	86	90	11.6	14.01	3.48	2.99	0.95	1.96	8.3	61.1	294.2	84.8	6	YES
295	69	female	10	YES	NO	NO	NO	NO	NO	NO	NO	NO	YES	YES	NO	NO	NO	23.4236	0.956989	0.542683	29.76	4.19448	1.31739	26.281	15.8308	0.0848919	8.45773	0.469347	164	63	89	93	7.3	6.18	5.24	0.96	1.11	3.57	3.4	66.4	292.8	81.45	15	NO
296	70	male	15	YES	YES	NO	NO	YES	YES	NO	YES	NO	YES	NO	NO	YES	YES	20.4152	0.944444	0.5	17	3.3588	1.3237	22.604	14.4325	0.0872754	8.84686	0.293103	170	59	85	90	10.5	10.3	5.08	0.85	1.45	3.01	7.8	77.8	266.3	87.01	16	NO
297	71	female	0.25	YES	NO	NO	NO	NO	NO	YES	NO	NO	YES	NO	NO	NO	NO	28.0843	1.04444	0.591195	90.72	5.23004	1.29054	26.8897	17.6608	0.0806838	9.70196	1.48981	159	71	94	90	10.3	8.17	4.23	2.52	1	2.73	11.8	115.7	416.3	41.04	9	NO
298	78	male	30	NO	YES	NO	NO	NO	YES	NO	NO	NO	YES	YES	YES	NO	NO	25.9516	0.914894	0.505882	23.31	3.4698	1.18786	24.4087	14.7472	0.0752486	9.26232	0.425401	170	75	86	94	9.7	11.95	5.48	1.11	1.32	3.04	7.7	62.4	421.3	90.1	6	YES
299	82	male	23	NO	YES	NO	NO	NO	NO	NO	NO	NO	NO	NO	NO	YES	NO	21.6311	0.842105	0.506329	12.6	3.47828	1.25544	29.8341	12.6425	0.0819801	8.89804	0.383168	158	54	80	95	7.6	10.97	3.63	0.84	1.11	1.8	5.4	63.7	269.9	86.84	6	NO
300	68	male	4	YES	YES	NO	NO	NO	NO	NO	NO	NO	YES	NO	NO	NO	NO	27.0641	0.853211	0.537572	36.68	4.09071	1.24692	29.9024	17.1188	0.0784389	9.04036	0.81886	173	81	93	109	7.7	8.11	4.61	1.31	0.86	2.55	5.1	58.8	195.3	99.04	9	NO
301	70	male	1	NO	NO	NO	NO	NO	NO	NO	NO	NO	YES	NO	NO	NO	YES	25.5354	0.836735	0.463277	18.02	2.69594	1.119	23.6166	13.2688	0.0710774	9.01379	0.491073	177	80	82	98	8.4	9.76	3.37	1.06	1	2.17	4.5	89.9	316.1	74.4	6	NO
302	61	male	20	NO	YES	NO	NO	NO	YES	NO	NO	NO	YES	NO	NO	NO	NO	28.0102	1.02062	0.585799	74.8	5.11032	1.3201	26.1511	19.5992	0.0825684	10.1336	1.41622	169	80	99	97	7.1	14.41	4.32	2.2	0.91	2.92	14.7	220.5	515.4	26.79	12	YES
303	63	male	20	NO	NO	NO	NO	NO	NO	NO	YES	YES	NO	YES	NO	NO	YES	26.3465	1.04444	0.576687	27.55	4.91075	1.31597	25.2475	17.6608	0.0831545	9.14846	0.576687	163	70	94	90	7.5	12.46	2.88	0.95	0.95	1.72	9.8	73.2	572.6	93.74	15	NO
304	69	male	10	NO	NO	YES	NO	NO	YES	NO	NO	NO	NO	NO	NO	YES	YES	19.9481	0.975	0.478528	12.87	2.96494	1.25494	20.4422	12.1652	0.0830616	8.17569	0.401477	163	53	78	80	7.6	4.52	3.79	0.99	1.18	2.23	7.7	71.9	272.4	90.56	12	NO
305	74	male	0.5	NO	NO	YES	NO	NO	NO	NO	NO	YES	YES	NO	YES	NO	NO	28.8672	0.989474	0.5875	44.66	5.14794	1.26893	28.9401	17.6713	0.0789705	8.84948	0.695962	160	73.9	94	95	5.9	5.7	5.98	1.54	1.3	3.72	6.3	67.1	221.8	89.93	12	NO
306	66	male	0.5	YES	NO	NO	NO	NO	YES	NO	NO	NO	NO	NO	NO	NO	YES	20.3074	0.958904	0.414201	2.85	1.89066	1.09623	15.2271	9.7937	0.0723411	7.93481	0.142226	169	58	70	73	6.1	6.17	3.97	0.57	1.66	2.03	5.4	51.7	241.9	105.88	0	NO
307	63	male	9	YES	NO	NO	NO	NO	YES	NO	NO	NO	YES	NO	NO	NO	NO	24.7409	0.954545	0.502994	21.47	3.41513	1.19891	22.7763	14.1008	0.0765556	9.19461	0.557238	167	69	84	88	13.3	10.97	4.61	1.13	1.02	3.07	3.9	63.3	233.9	99.52	6	YES
308	67	female	10	YES	NO	YES	NO	NO	NO	NO	NO	NO	YES	NO	NO	NO	NO	22.0386	0.804598	0.424242	15.48	2.04795	1.06497	23.0481	9.5977	0.0693267	8.90457	0.374844	165	60	70	87	5.7	7.19	6.15	1.29	1.46	4.19	3.8	44.7	227.4	100.1	12	NO
309	63	male	30	NO	YES	NO	NO	NO	NO	NO	NO	NO	YES	NO	NO	YES	NO	24.2215	0.842697	0.441176	19.1	2.32193	1.07228	22.1529	11.1128	0.0687126	9.55757	0.79495	170	70	75	89	10.3	9.33	6.47	1.91	1.06	4.44	4.7	60.8	279.8	101.17	9	NO
310	67	female	10	NO	YES	NO	NO	NO	NO	NO	NO	NO	NO	NO	YES	NO	NO	21.4786	0.804598	0.440252	6.36	2.30668	1.09893	25.3934	9.5977	0.0718449	8.83106	0.175439	159	54.3	70	87	11.1	16.26	4.86	0.53	1.33	3.11	3.6	48.8	176.4	97.24	9	NO
311	72	female	1	NO	NO	NO	NO	NO	NO	NO	NO	NO	YES	NO	NO	NO	NO	27.5873	0.968085	0.579618	39.93	4.97458	1.26856	29.7835	16.5557	0.079546	8.78624	0.389632	157	68	91	94	9.7	6.81	6.33	1.21	1.8	3.81	6.8	67.2	282	78.61	9	YES
312	63	male	10	NO	YES	NO	YES	NO	YES	NO	NO	YES	YES	NO	NO	YES	YES	25.8645	0.857143	0.5	15.58	3.3588	1.16908	27.0051	13.9748	0.0741006	7.87255	0.325397	168	73	84	98	5.6	4.03	4.97	0.82	1.26	3.14	4.9	69	286.3	96.04	6	NO
313	69	female	10	YES	NO	NO	YES	NO	YES	NO	NO	NO	YES	YES	NO	NO	NO	38.9543	0.873016	0.723684	50.96	8.52959	1.3115	49.2365	24.0208	0.0776427	8.40797	0.681933	152	90	110	126	9.4	5.76	3.04	0.98	1.04	1.8	5.7	62.4	312.7	87.74	9	YES
314	65	male	12	YES	NO	YES	NO	NO	NO	NO	NO	NO	YES	NO	NO	NO	YES	25.6489	0.9375	0.526316	37.25	3.86571	1.24676	24.9316	16.1748	0.0791344	9.06662	0.56015	171	75	90	96	10.7	7.32	5.47	1.49	1.4	3.38	5.6	94.7	489.9	72.36	9	NO
315	70	female	29	NO	YES	NO	NO	NO	YES	NO	NO	NO	YES	NO	YES	NO	NO	28.5483	1.03061	0.627329	76.11	6.06112	1.36676	29.9719	20.3957	0.0852161	9.77394	0.917663	161	74	101	98	8.8	12.5	6.81	1.77	1.21	5.09	6.3	91.9	424	54.6	9	YES
316	68	female	20	YES	NO	YES	NO	NO	NO	NO	NO	NO	YES	YES	YES	NO	NO	28.5156	0.97	0.60625	78	5.57008	1.31748	31.4106	18.8117	0.0821593	8.97178	0.932692	160	73	97	100	6	4.96	4.94	2	1.3	3.09	7.3	62.3	322.6	88.53	16	NO
317	63	female	23	YES	YES	YES	NO	NO	NO	NO	NO	NO	YES	YES	NO	NO	NO	26.8544	0.967033	0.53012	75.3	3.94121	1.20919	24.548	15.4817	0.0761643	9.18879	1.35776	166	74	88	91	8.6	4.91	4.3	2.51	0.98	2.78	7.3	78.7	316.1	69.16	9	YES
318	63	female	5	NO	NO	YES	NO	NO	YES	NO	NO	NO	YES	NO	NO	NO	NO	22.0317	0.9	0.512658	13.11	3.5993	1.25952	27.3166	13.0653	0.0819956	7.79408	0.38962	158	55	81	90	7.1	5.36	2.42	0.57	0.75	1.53	6.1	42.5	347.4	104.69	9	NO
319	65	female	9	YES	NO	NO	YES	NO	YES	NO	NO	NO	YES	NO	YES	NO	NO	27.3438	0.797872	0.46875	13.26	2.79146	1.04027	28.446	10.9973	0.0653275	8.43025	0.240543	160	70	75	94	6.6	7.4	4.96	0.78	1.52	3.42	6.3	55	443.7	94.82	12	NO
320	70	female	20	NO	YES	NO	NO	NO	YES	NO	NO	YES	YES	NO	NO	NO	NO	19.2837	0.915663	0.460606	21.78	2.64975	1.23609	21.1609	11.5177	0.0822768	8.80803	0.361905	165	52.5	76	83	7.7	6.96	6.32	1.21	1.54	4.42	4.2	50.6	288.2	94.1	9	NO
321	65	male	20	YES	NO	NO	NO	NO	NO	YES	NO	NO	NO	NO	NO	NO	NO	27.968	0.968085	0.54491	14.04	4.24002	1.22159	25.5565	16.5557	0.0764262	7.80326	0.204341	167	78	91	94	10.1	5.71	3.54	0.54	1.44	1.8	6.7	67.1	309.1	95.78	9	YES
322	65	female	4	YES	NO	YES	NO	NO	YES	NO	NO	NO	YES	NO	YES	NO	NO	25.9488	0.89	0.549383	95.48	4.33205	1.25935	30.4984	15.7573	0.0797789	10.0027	1.74443	162	68.1	89	100	9.3	9.03	3.76	3.08	0.97	2.41	4.7	47.5	318.2	99.51	16	YES
323	67	male	19	NO	YES	NO	NO	NO	NO	NO	NO	NO	YES	YES	NO	NO	NO	26.1752	0.983871	0.547904	23.32	4.30154	1.26967	25.0932	16.7429	0.0803162	8.94911	0.482156	167	73	91.5	93	9.6	11.02	2.75	0.88	1	1.72	4.7	89.4	223.4	76.5	9	NO
324	68	female	12	NO	YES	NO	YES	NO	NO	NO	NO	NO	NO	NO	NO	NO	NO	27.31	1.02222	0.544379	22.1	4.22914	1.24239	22.965	16.9252	0.0780364	8.84021	0.247445	169	78	92	90	9	13.38	6.05	0.65	1.43	4.26	7.3	51.5	238	94.88	12	NO
325	67	male	20	YES	NO	YES	NO	NO	NO	NO	NO	NO	YES	NO	NO	YES	YES	24.3757	0.838095	0.505747	35.65	3.46723	1.23966	27.7473	15.2857	0.0793541	9.25202	0.776147	174	73.8	88	105	9.4	8.47	3.66	1.55	1.01	2.16	4	82.8	281.2	83.93	15	NO
326	75	female	0	YES	NO	NO	NO	NO	NO	NO	NO	NO	YES	NO	NO	NO	NO	27.5556	0.989474	0.626667	38.88	6.04542	1.34138	33.7115	17.6713	0.0841284	9.37013	0.524651	150	62	94	95	9.2	13.68	5.06	1.08	1.29	3.26	5	51.7	303.2	90.19	9	YES
327	70	female	25	NO	YES	NO	NO	NO	NO	NO	NO	NO	YES	NO	NO	NO	NO	29.8233	0.913793	0.701987	71.52	7.94147	1.44915	44.5162	22.402	0.0896976	10.0083	1.05653	151	68	106	116	8.6	18.77	2.28	1.49	0.99	1.37	5.7	72.2	354.7	73.09	6	NO
328	72	male	5	YES	NO	YES	NO	NO	NO	NO	NO	NO	YES	NO	YES	YES	YES	27.4406	0.961905	0.573864	32.4	4.84956	1.33334	26.9697	20.3908	0.0836828	7.96564	0.645597	176	85	101	105	6.3	4.03	2.86	0.9	0.8	1.65	7.2	107.5	319.9	59.11	15	YES
329	72	male	21	YES	YES	NO	NO	NO	YES	NO	NO	NO	YES	NO	YES	YES	YES	22.7583	0.917526	0.526627	19.68	3.87187	1.31659	26.1511	15.7972	0.0852485	8.22624	0.273313	169	65	89	97	7.2	5.74	4.87	0.82	1.58	3.12	5.8	56.9	297.6	97.59	11	NO
330	61	female	2	YES	NO	NO	NO	NO	NO	NO	NO	NO	YES	NO	NO	NO	NO	31.6443	0.963636	0.666667	75.84	7.02433	1.37099	36.8652	22.4608	0.0840253	9.64831	0.816537	159	80	106	110	8.7	12.35	3.66	1.58	1.29	2.22	3.8	55.4	275.7	97.29	6	YES
331	60	male	16	YES	YES	YES	NO	NO	NO	NO	YES	YES	YES	NO	NO	NO	NO	33.0901	1.09735	0.704545	132.16	8.00984	1.4907	30.396	30.6673	0.0906845	9.67088	1.75354	176	102.5	124	113	11.6	8.91	5.96	2.24	0.9	4.29	5.1	56.8	303.2	106.25	12	YES
332	78	female	40	YES	NO	NO	NO	NO	NO	NO	NO	NO	YES	NO	NO	NO	NO	20.1733	0.906977	0.490566	16	3.18358	1.26352	24.8946	12.1232	0.0834729	8.54472	0.363382	159	51	78	86	7.5	8.09	4.26	0.8	1.08	2.93	6.2	74.4	268.6	66.64	12	NO
333	73	female	16	YES	YES	NO	NO	NO	YES	YES	NO	NO	YES	NO	NO	NO	NO	19.4734	0.927711	0.490446	63.08	3.18137	1.2776	24.1919	11.8328	0.084901	9.82168	1.59635	157	48	77	83	7.9	6.99	4.46	3.32	1.02	2.9	5.4	38.7	186.7	100.63	0	YES
334	73	male	20	NO	YES	NO	NO	NO	NO	NO	NO	NO	YES	NO	NO	NO	NO	24.1115	0.879121	0.45977	10.65	2.63535	1.13312	21.6477	12.7153	0.0726662	8.60377	0.229885	174	73	80	91	8.8	9.67	3.98	0.71	1.42	2.42	6.3	73.5	307.5	87.23	12	NO
335	71	male	16	YES	NO	YES	NO	NO	NO	NO	NO	NO	NO	NO	YES	YES	YES	27.6817	0.980952	0.605882	52.82	5.56167	1.3775	29.3714	21.2152	0.0863279	8.76612	1.09374	170	80	103	105	8.6	5.81	2.43	1.39	0.77	1.34	5.2	76.6	335.9	86.99	9	YES
336	66	male	18	YES	NO	NO	YES	NO	YES	NO	NO	NO	NO	NO	NO	NO	NO	23.255	0.914894	0.502924	36.12	3.41381	1.25117	24.0372	14.7472	0.0807215	9.06958	0.692023	171	68	86	94	6.7	6.36	4.82	1.72	1.25	3.58	4.7	52.9	294.6	104.89	9	NO
337	69	female	15	YES	YES	NO	NO	NO	YES	NO	NO	NO	YES	NO	NO	NO	NO	28.6505	0.940594	0.558824	26.64	4.52886	1.24884	27.5667	18.0248	0.0778175	8.89033	0.329797	170	82.8	95	101	6.5	12.7	3.12	0.72	1.22	1.85	3.9	59.9	232.5	89.64	12	NO
338	69	male	30	YES	YES	NO	NO	NO	YES	NO	NO	NO	YES	YES	NO	YES	NO	27.3646	0.9	0.545455	32	4.25118	1.2288	29.1818	16.13	0.0771569	9.25914	0.640534	165	74.5	90	100	8.1	10.33	3.48	1.28	1.09	2.24	7.1	89.2	272	75.64	6	YES
339	77	female	28	NO	YES	NO	NO	NO	YES	NO	NO	NO	YES	NO	NO	NO	NO	29.6427	0.933333	0.620253	44.8	5.89434	1.31375	34.8693	19.1737	0.081399	8.51511	0.614764	158	74	98	105	8.1	5.61	4.31	1.12	1.13	2.68	6.2	59.7	301.5	84.84	12	YES
340	67	female	16	YES	YES	NO	NO	NO	NO	NO	NO	NO	YES	NO	YES	NO	NO	30.4832	0.936364	0.635802	49.5	6.26343	1.34469	35.3482	21.1837	0.082929	8.85697	0.624449	162	80	103	110	8	8.04	3.77	1.1	1.12	2.18	7.2	77.3	411.2	68.74	12	NO
341	62	female	2	YES	NO	NO	NO	NO	NO	NO	NO	NO	YES	NO	NO	NO	NO	21.2306	0.806452	0.474684	16.32	2.8963	1.18802	28.8271	11.0232	0.0778201	8.28507	0.325497	158	53	75	93	6.5	5.2	5.87	0.96	1.4	3.66	5	44.5	233.3	103.8	15	NO
342	68	female	31	NO	YES	NO	NO	NO	NO	YES	NO	YES	YES	YES	NO	NO	NO	26.398	0.888889	0.487805	33.88	3.13294	1.11547	24.8526	12.73	0.0704619	9.27119	0.816543	164	71	80	90	8	8.69	3.67	1.54	0.92	2.22	6.5	67.6	374.2	80.33	9	NO
343	73	male	1	NO	NO	NO	NO	NO	NO	NO	NO	NO	NO	NO	NO	YES	NO	24.1517	0.955556	0.472527	53.76	2.85804	1.19004	18.6552	14.7808	0.0762953	10.2549	0.733134	182	80	86	90	10.1	13.98	7.31	2.56	1.65	4.72	6.34	78	258.4	85.13	12	YES
344	67	male	24	YES	YES	NO	NO	NO	YES	NO	NO	NO	YES	YES	NO	NO	NO	27.6584	0.979381	0.575758	33.3	4.89057	1.29015	27.7663	18.0472	0.0808656	8.42446	0.734587	165	75.3	95	97	8	5.17	2.53	1.11	0.87	1.41	6.5	85.1	455.7	81.2	15	YES
345	79	male	14	YES	NO	YES	NO	NO	YES	NO	NO	YES	YES	NO	NO	NO	NO	31.2461	1.03846	0.606742	73.53	5.58134	1.32859	25.7929	23.3168	0.0815988	9.264	1.57201	178	99	108	104	7.5	7.77	3.46	1.71	0.66	2.38	6.8	72	276.4	84.34	12	YES
346	72	male	4	NO	NO	NO	NO	NO	NO	NO	NO	NO	YES	NO	YES	NO	YES	23.4699	0.95	0.530726	28.5	3.95329	1.34467	23.7562	18.0325	0.0866209	8.56035	0.700264	179	75.2	95	100	5.8	6.92	3.53	0.95	0.72	2.39	8.6	93.9	393.6	69.61	16	NO
347	68	male	6	NO	NO	NO	NO	NO	YES	YES	NO	NO	YES	NO	NO	YES	YES	28.9634	0.867347	0.518293	18	3.70834	1.13148	28.6617	14.3317	0.070377	9.09439	0.412799	164	77.9	85	98	10.9	12.46	2.95	0.9	1.13	1.7	7.6	88	235.5	77.43	9	YES
348	69	female	40	NO	YES	NO	NO	NO	NO	NO	NO	NO	YES	YES	YES	NO	NO	30.7306	0.990476	0.684211	50.14	7.47367	1.39605	38.0304	21.6313	0.08598	8.40821	0.731166	152	71	104	105	6.5	5.18	3.28	1.09	1.02	1.91	5.4	64.7	383.2	84.03	6	YES
349	75	male	32	YES	YES	NO	NO	NO	YES	YES	NO	NO	YES	YES	NO	NO	NO	26.6749	1.05155	0.596491	37	5.34866	1.38556	25.3788	20.7905	0.087371	9.12737	0.527868	171	78	102	97	7.7	11.59	3.64	1	1.13	2.45	6.6	79.7	316.7	83.2	16	NO
350	60	male	14	YES	NO	NO	NO	NO	NO	NO	NO	NO	NO	NO	NO	NO	YES	21.4533	0.941176	0.470588	7.95	2.82379	1.21532	20.3482	12.7825	0.07947	7.93245	0.151159	170	62	80	85	6.2	6.62	4.54	0.53	1.65	2.64	4.5	74.2	313.9	95.2	11	NO
351	65	male	10	YES	NO	NO	NO	YES	YES	NO	NO	NO	NO	NO	NO	NO	NO	26.7229	1.03297	0.576687	18.85	4.91075	1.30667	25.728	17.6657	0.0823718	8.23158	0.267748	163	71	94	91	6.9	7.28	4.15	0.65	1.4	2.39	7.8	116.7	437.8	56.22	6	NO
352	65	female	15	YES	NO	NO	NO	NO	NO	NO	NO	NO	YES	NO	NO	NO	NO	21.3599	0.833333	0.471698	85.68	2.84338	1.18069	26.8897	11.0925	0.0772615	10.7895	1.61725	159	54	75	90	10.5	12.12	7.41	5.04	1.47	4.96	3.8	35.6	343	109.41	12	NO
353	61	female	17	NO	YES	NO	YES	NO	YES	NO	NO	NO	NO	YES	NO	NO	NO	27.6095	0.962264	0.610778	49.72	5.6741	1.37812	31.1169	20.7968	0.0864046	8.38459	0.616232	167	77	102	106	7.7	4.88	4.63	1.13	1.12	2.91	5.3	73.7	442.7	75.98	12	NO
354	64	male	20	NO	YES	NO	YES	NO	YES	NO	NO	NO	YES	YES	YES	YES	YES	24.093	0.949495	0.559524	11.31	4.5436	1.35551	27.4644	17.6545	0.0869387	6.48231	0.167857	168	68	94	99	5.4	2.11	5.1	0.39	1.3	3.34	8.7	129.7	436.5	49.82	12	YES
355	60	female	9	NO	YES	NO	NO	NO	NO	NO	NO	NO	YES	NO	YES	NO	NO	26.6347	0.924883	0.608025	46.98	5.61075	1.37572	33.6508	19.3597	0.0867722	8.70969	0.801487	162	69.9	98.5	106.5	6.7	6.58	2.72	1.16	0.88	1.61	4.7	60.3	329.2	95.29	12	YES
356	71	male	20	YES	YES	NO	NO	YES	NO	NO	NO	NO	NO	NO	YES	NO	NO	32.3884	0.941176	0.592593	20.77	5.26124	1.21589	31.4684	18.4068	0.0742314	8.25776	0.389252	162	85	96	102	9.7	7.25	3.73	0.67	1.02	2.5	7.4	85.9	289.8	78.06	16	NO
357	71	female	20	YES	NO	YES	NO	NO	NO	NO	NO	NO	YES	YES	NO	NO	NO	27.2173	0.917526	0.536145	66.34	4.0619	1.21475	27.3534	15.7972	0.0763436	9.58514	0.910595	166	75	89	97	8.6	8.56	4.59	2.14	1.26	2.67	7.3	97.1	372.5	50.73	12	NO
358	61	male	11	YES	YES	NO	NO	NO	NO	NO	NO	NO	YES	NO	NO	YES	YES	27.3438	0.989474	0.5875	59.74	5.14794	1.3038	28.9401	17.6713	0.0818771	9.79236	1.18652	160	70	94	95	8.7	10.94	5.03	2.06	1.02	3.42	6	67.8	362.8	98.11	16	YES
359	63	female	10	YES	YES	YES	NO	NO	YES	NO	NO	NO	YES	NO	NO	NO	NO	22.7646	0.913978	0.544872	66.15	4.23923	1.30858	29.7305	14.4052	0.0847259	9.96483	1.99244	156	55.4	85	93	8.2	10.93	4.34	2.45	0.67	3.03	6.2	64.2	336.4	88.57	12	YES
360	74	male	2	YES	NO	YES	NO	NO	YES	NO	NO	NO	NO	YES	NO	YES	YES	31.0204	1.03982	0.671429	58.275	7.14508	1.46308	30.8114	27.5983	0.0899678	9.11276	1.0497	175	95	117.5	113	11.7	10.29	3.28	1.11	0.71	2.24	7.2	66.1	281.7	90.49	12	YES
361	62	female	13	YES	NO	YES	NO	NO	NO	NO	NO	NO	NO	NO	NO	NO	NO	22.6431	0.885417	0.548387	83.97	4.3115	1.31631	31.7478	14.3653	0.0853027	10.4707	1.37539	155	54.4	85	96	9.2	14.28	5.89	3.11	1.24	3.9	4.3	34.5	211.7	112.86	12	NO
362	61	female	15	NO	NO	YES	NO	NO	NO	NO	NO	NO	NO	NO	NO	NO	NO	21.9076	0.89011	0.515924	64.63	3.66234	1.2671	28.2585	13.052	0.0825668	10.2094	1.31795	157	54	81	91	10.4	12.17	4.84	2.81	1.1	3.17	6.7	49.6	261.3	100.9	15	YES
363	70	female	7	YES	NO	YES	NO	NO	NO	NO	NO	YES	YES	NO	NO	NO	NO	26.3465	0.960784	0.601227	304.8	5.45565	1.37197	31.0138	19.1968	0.0866929	10.4485	6.27582	163	70	98	102	8.4	5.7	4.43	7.62	0.73	2.6	13.3	121.3	551.6	39.04	12	YES
364	78	female	0.25	NO	NO	NO	NO	NO	NO	NO	NO	NO	YES	NO	YES	NO	NO	26.2778	0.942857	0.626582	34.85	6.04343	1.40957	34.8693	19.5768	0.0891074	8.92436	0.479815	158	65.6	99	105	15.9	11.13	4.85	0.85	1.11	3.21	2.7	34.2	191.4	101.18	12	YES
365	68	female	20	NO	YES	NO	NO	NO	YES	NO	NO	NO	YES	NO	NO	NO	NO	26.0156	0.967391	0.55625	36.58	4.47487	1.26557	27.4577	15.8357	0.0801384	8.3334	0.55625	160	66.6	89	92	7.8	4.44	5.22	1.18	1.18	3.49	4.5	63.1	340	87.31	16	NO
366	67	male	1	YES	NO	NO	NO	NO	NO	NO	NO	NO	NO	NO	NO	YES	YES	26.2188	0.98913	0.541667	35.62	4.17376	1.25792	24.2497	16.5613	0.0795508	9.57679	0.720469	168	74	91	92	8.6	13.26	5.8	1.37	1.03	4.42	8.8	61.6	189.8	97.84	11	NO
367	60	male	13	NO	YES	NO	NO	NO	NO	NO	NO	NO	YES	YES	NO	NO	NO	25.2577	0.84	0.506024	14.25	3.47249	1.19015	28.7561	13.9328	0.075735	9.12262	0.296498	166	69.6	84	100	10.4	15.38	3.54	0.75	1.28	1.99	6.4	63	250	101.82	9	YES
368	80	male	2	YES	NO	NO	NO	NO	NO	NO	NO	NO	NO	NO	YES	NO	NO	25.5709	0.881443	0.502941	12.505	3.41413	1.18971	25.7621	14.5279	0.0755516	8.35427	0.24157	170	73.9	85.5	97	12.2	8.77	3.01	0.61	1.27	1.64	4.8	53	154.5	94.99	0	NO
369	69	female	5	YES	NO	NO	NO	NO	NO	NO	NO	NO	NO	NO	YES	NO	NO	22.7444	0.913978	0.534591	39.42	4.03065	1.29675	28.386	14.4052	0.0839727	9.18746	0.530955	159	57.5	85	93	11.7	8.43	5.43	1.46	1.47	3.19	6.6	47.5	252.3	96.75	15	YES
370	80	male	0.17	NO	NO	NO	NO	NO	NO	NO	NO	NO	YES	NO	NO	NO	NO	23.0546	0.921348	0.471264	20.06	2.83572	1.18778	20.7763	13.4137	0.0767423	9.24608	0.519712	174	69.8	82	89	12.3	11.06	4.87	1.18	1.07	3.41	4.4	60.2	246.8	90.15	0	NO
371	61	female	14	NO	YES	NO	NO	NO	NO	NO	NO	NO	YES	NO	YES	NO	NO	29.3501	0.952381	0.628931	104.58	6.09915	1.34298	34.3713	19.9825	0.083348	9.85647	1.49146	159	74.2	100	105	8.6	9.65	5.69	2.49	1.05	3.85	5	70.1	306	80.68	16	NO
372	65	female	0.5	YES	NO	NO	NO	NO	NO	NO	NO	NO	YES	NO	NO	NO	NO	24.1406	0.945652	0.54375	53.36	4.21627	1.28428	27.4577	15.1205	0.082343	9.00798	0.83375	160	61.8	87	92	6.1	5.59	4.02	1.84	1.2	2.26	5.6	71	256.6	77.24	16	NO
373	63	male	23	NO	YES	NO	NO	NO	NO	NO	YES	YES	NO	NO	NO	YES	YES	29.2693	1.05	0.606936	100	5.5858	1.35374	25.9472	22.0325	0.084054	10.1445	1.09952	173	87.6	105	100	9.7	12.82	4.84	2.5	1.38	2.8	5.7	51.3	251.5	108.48	16	NO
374	63	female	6	YES	NO	NO	NO	NO	NO	NO	NO	NO	NO	NO	NO	NO	NO	24.7768	0.99435	0.575163	51.9	4.87769	1.31126	28.7634	15.4878	0.0837093	9.01042	0.94765	153	58	88	88.5	6.3	5.96	5.18	1.73	1.05	3.54	6.6	56.1	422.2	95.54	9	NO
375	71	male	3	YES	NO	NO	NO	NO	NO	NO	NO	NO	YES	NO	YES	NO	NO	22.3214	0.879121	0.47619	22.5	2.92314	1.19853	23.7905	12.7153	0.0778552	9.68242	0.721501	168	63	80	91	10	13.46	5.19	1.5	0.99	3.85	6.4	78.9	370.9	85.93	9	NO
376	70	male	40	NO	YES	NO	NO	NO	NO	NO	NO	NO	YES	NO	NO	NO	NO	31.0303	1.01493	0.593023	79.92	5.27087	1.2809	26.5526	20.8064	0.0787612	9.3961	1.47233	172	91.8	102	100.5	7.2	7.02	5.09	2.16	0.87	4.15	7.2	70.2	408.8	90.77	12	NO
377	60	male	3	NO	NO	YES	NO	NO	NO	NO	NO	YES	NO	NO	NO	NO	NO	26.483	1.01724	0.536364	32.43	4.06632	1.22826	23.0481	15.6629	0.0775455	8.64605	0.763074	165	72.1	88.5	87	7.2	5.19	5.34	1.38	0.97	3.57	6.2	73.7	187.5	95.47	15	NO
378	72	male	10	YES	NO	NO	YES	NO	YES	NO	NO	YES	YES	YES	NO	YES	YES	24.677	0.903226	0.506024	37.81	3.47249	1.20407	25.4831	14.0553	0.0769184	9.47072	1.03813	166	68	84	93	8.4	8.21	5.46	1.99	0.97	3.54	5.9	79	502.3	85.29	6	NO
379	62	female	10	NO	YES	NO	NO	NO	NO	NO	NO	NO	YES	YES	YES	NO	NO	28.8695	0.95098	0.638158	57.33	6.32017	1.3434	36.4296	18.8005	0.0836034	8.16443	0.727203	152	66.7	97	102	7.2	3.01	5.74	1.47	1.29	3.75	5.6	54.2	399.5	97.31	12	YES
380	68	female	1	NO	NO	YES	NO	NO	YES	NO	NO	NO	YES	NO	NO	NO	NO	22.3922	0.91954	0.506329	36.52	3.47828	1.23392	25.806	12.7657	0.0801118	9.69039	0.677828	158	55.9	80	87	8.2	12.26	4.77	1.66	1.24	2.83	9.2	62.9	258.2	87.58	15	NO
381	67	female	13	NO	YES	YES	NO	NO	YES	NO	NO	NO	YES	YES	YES	NO	NO	23.5539	0.917526	0.563291	61.07	4.62321	1.33845	30.8412	15.7972	0.0861693	9.29544	1.18051	158	58.8	89	97	9.4	6.96	5.58	1.97	0.94	3.76	7.6	58.4	348.6	91.67	6	NO
382	62	female	13	YES	YES	NO	NO	NO	NO	NO	NO	NO	NO	NO	NO	NO	NO	24.1217	0.831579	0.523179	34.86	3.80388	1.2009	33.1986	12.3028	0.0770075	9.38792	0.447668	151	55	79	95	9.7	9.06	9.23	1.66	1.94	6.28	7.8	62.3	431	92.41	12	YES
383	76	female	30	NO	YES	YES	NO	NO	YES	NO	NO	NO	YES	NO	NO	NO	NO	23.7141	0.94382	0.531646	23.14	3.97163	1.25898	26.813	14.0945	0.0809616	8.45682	0.411447	158	59.2	84	89	8.7	6.66	4.98	0.89	1.15	3.37	2.5	45.8	109.5	93.22	12	NO
384	67	female	7	NO	NO	YES	NO	NO	NO	YES	NO	NO	NO	NO	NO	NO	NO	22.6757	0.960452	0.505952	54.54	3.47112	1.26345	22.6424	14.4414	0.0818572	8.92789	1.14834	168	64	85	88.5	5.9	4.7	3.28	2.02	0.89	1.98	6.2	57.9	374.2	91.93	9	YES
385	67	male	20	YES	YES	NO	NO	YES	NO	NO	YES	YES	NO	YES	NO	YES	NO	27.1215	0.946809	0.497207	17.04	3.30656	1.17187	21.2508	15.8245	0.0736921	7.6101	0.653735	179	86.9	89	94	7.1	3.58	1.82	0.71	0.54	1.03	8.3	92.4	369.5	73.51	14	NO
386	84	female	16	YES	NO	YES	NO	NO	NO	NO	NO	NO	YES	NO	NO	NO	NO	21.6041	1.0625	0.52795	35.1	3.89808	1.32224	21.1608	14.4325	0.0863605	8.73468	0.672878	161	56	85	80	6.6	6.02	3.97	1.3	1.02	2.54	3.8	60.3	249.5	80.5	0	NO
387	65	male	10	YES	NO	YES	NO	NO	YES	NO	NO	NO	YES	NO	NO	NO	NO	31.2461	0.954545	0.589888	53.2	5.20093	1.29168	28.3194	22.0325	0.0793321	8.92532	0.993102	178	99	105	110	6.6	7.12	3.51	1.33	0.79	2.34	6.8	77.9	368.3	90.1	16	YES
388	68	female	20	YES	YES	NO	NO	NO	YES	NO	NO	NO	YES	NO	NO	NO	NO	22.4914	0.833333	0.52795	12.96	3.89808	1.2959	31.93	14.2477	0.084074	7.72665	0.263975	161	58.3	85	102	9.2	5.95	3.12	0.48	0.96	1.96	5.6	56.9	442.9	91.82	0	NO
389	68	male	6	NO	YES	NO	NO	NO	YES	NO	YES	YES	YES	YES	NO	YES	NO	26.7539	0.961905	0.58046	83.16	4.99299	1.35809	27.7473	20.3908	0.0855964	9.89403	1.67608	174	81	101	105	11.8	10.8	4.97	2.31	0.8	3.44	6.5	71.7	400.1	91.28	6	NO
390	66	female	0.25	YES	YES	NO	NO	NO	NO	NO	NO	NO	YES	NO	NO	NO	NO	24.2748	0.955556	0.51497	24.92	3.64389	1.23918	23.703	14.7808	0.0793785	8.82869	0.385146	167	67.7	86	90	8.1	9.66	2.81	0.89	1.19	1.49	4.6	45.4	186.6	100.29	12	NO
391	67	male	14	NO	YES	NO	NO	NO	YES	NO	NO	NO	YES	NO	NO	YES	YES	24.4579	0.951613	0.511561	29.14	3.5782	1.2482	22.8709	15.6503	0.079856	9.33208	0.729121	173	73.2	88.5	93	10	11.47	3.47	1.24	0.87	2.11	3.4	70.8	214.5	92.4	12	NO
392	64	female	1	YES	YES	NO	NO	NO	NO	NO	YES	NO	YES	NO	YES	NO	NO	32.0399	0.973451	0.691824	67.08	7.67248	1.41391	38.3615	24.1937	0.0864769	9.8956	0.756316	159	81	110	113	14.8	19.37	5.01	1.29	1.18	3.5	5.8	71.7	304.7	76.88	9	YES
393	83	male	20	NO	YES	NO	YES	NO	NO	NO	NO	NO	YES	YES	NO	NO	NO	23.4236	0.894737	0.518293	23.4	3.70834	1.25818	27.2333	14.38	0.0810765	8.68426	0.666376	164	63	85	95	8.2	6.36	4.24	1.17	0.91	2.86	3.3	91.6	280.7	66.39	16	NO
394	65	male	10	NO	NO	YES	NO	NO	NO	NO	NO	NO	YES	NO	NO	NO	YES	25.8264	0.941489	0.502841	35.955	3.41224	1.20428	22.2586	15.6433	0.0763503	9.67892	0.884306	176	80	88.5	94	9.3	13.15	4.96	1.53	0.87	3.58	4.1	62.4	210.2	98.7	12	YES
395	68	female	10	YES	NO	NO	NO	NO	NO	NO	NO	NO	NO	NO	NO	NO	NO	29.0657	1.00952	0.623529	123.36	5.97132	1.38345	29.3714	22.4713	0.0859991	9.58545	1.1365	170	84	106	105	6.7	7.13	6.42	2.57	1.41	4.39	5.2	69.1	514.7	78.17	14	NO
396	72	male	10	YES	NO	NO	NO	NO	NO	NO	NO	NO	YES	NO	YES	NO	NO	31.6406	1.065	0.665625	49.8	6.99803	1.37322	31.4106	22.6549	0.084164	8.86642	1.03734	160	81	106.5	100	7.9	7.44	3.51	1.2	0.77	2.24	5.1	87.7	294.2	75.59	12	NO
397	68	male	20	NO	YES	YES	NO	NO	YES	NO	NO	NO	YES	YES	NO	YES	NO	30.1038	0.954128	0.611765	24.57	5.69686	1.33374	31.176	21.6145	0.0824254	7.85225	0.281322	170	87	104	109	7.3	5.14	4.17	0.63	1.37	2.54	3.7	73.2	296.2	90.5	14	NO
398	68	female	12	YES	NO	NO	NO	NO	YES	NO	NO	NO	YES	NO	NO	NO	NO	25.3945	0.842105	0.512821	12.76	3.60242	1.16609	30.757	12.6425	0.074137	7.54593	0.275404	156	61.8	80	95	7.5	4.11	4.91	0.58	1.08	3.17	5.5	43.8	190.5	100.07	12	NO
399	60	male	0.5	NO	YES	NO	NO	NO	NO	YES	NO	NO	NO	NO	NO	NO	NO	17.8748	0.870588	0.418079	3.24	1.95095	1.20697	18.096	10.8673	0.0813612	7.92667	0.0741421	177	56	74	85	8.1	9.69	5.12	0.36	2.03	2.66	8.1	53.2	293.1	109.15	0	YES
400	73	male	25	YES	NO	NO	NO	NO	NO	NO	NO	NO	NO	NO	NO	YES	YES	25.1486	1.04046	0.555556	28	4.46034	1.2936	23.9511	16.1914	0.0823776	8.75907	0.592593	162	66	90	86.5	10	7.16	4.69	1.12	1.05	3.15	5.5	62.7	185.2	93.12	6	YES
401	66	male	1	NO	NO	NO	NO	NO	NO	NO	NO	NO	YES	NO	NO	NO	YES	27.388	0.863636	0.565476	33	4.66963	1.28488	32.516	17.8925	0.0806668	9.45013	0.497619	168	77.3	95	110	9.9	14.55	5.17	1.1	1.25	3.52	6.3	67.8	248.6	94.72	0	YES
402	64	male	20	YES	YES	NO	NO	NO	YES	NO	YES	NO	NO	NO	NO	NO	NO	21.746	0.920455	0.455056	16.32	2.55464	1.19443	19.0555	13.0877	0.0779272	8.4821	0.533514	178	68.9	81	88	6.3	5.96	3.08	1.02	0.87	1.9	4.4	64	328.5	98.36	6	YES
403	75	female	7	YES	NO	YES	NO	NO	YES	NO	NO	NO	YES	NO	NO	NO	NO	26.208	0.891089	0.573248	69.12	4.83627	1.28721	33.3419	16.1153	0.0814086	9.90607	1.01493	157	64.6	90	101	9.9	11.69	5.08	2.16	1.22	3.4	3.9	58.7	208.4	86.52	9	YES
404	65	male	18	YES	YES	NO	NO	NO	NO	NO	NO	NO	NO	NO	NO	NO	NO	22.7537	0.977778	0.53012	14.26	3.94121	1.31364	24.0805	15.4852	0.0850605	7.90212	0.248996	166	62.7	88	90	5.9	5.49	3.32	0.62	1.32	1.89	7.5	77.1	356.5	90.48	6	NO
405	63	female	7	NO	YES	NO	NO	NO	NO	YES	YES	NO	YES	NO	NO	NO	NO	21.3578	1.05882	0.532544	45.76	3.98961	1.37434	20.6891	16.1825	0.0899349	9.32034	0.382683	169	61	90	85	7	9.83	5.7	1.43	1.99	3.28	6.8	75.4	476.8	72.86	9	NO
406	76	male	0.25	YES	NO	NO	NO	NO	NO	NO	NO	NO	YES	NO	NO	NO	NO	25.5593	1.05556	0.56213	25.2	4.59862	1.32611	22.965	18.0325	0.0842198	8.62873	0.467514	169	73	95	90	7.5	8.38	2.74	0.84	1.01	1.64	5.8	76.6	311	83.97	9	NO
407	61	male	10	NO	NO	NO	NO	NO	YES	YES	YES	NO	YES	NO	NO	NO	NO	23.2254	0.934783	0.518072	16.8	3.70405	1.27068	25.0156	14.7668	0.0819977	8.29146	0.476388	166	64	86	92	6.1	6.28	2.99	0.8	0.87	1.91	6.6	71.6	276.5	95.93	6	NO
408	62	male	0	NO	NO	NO	NO	NO	NO	NO	NO	NO	NO	NO	NO	YES	YES	26.8274	0.978947	0.522472	34.44	3.79	1.23469	22.0031	17.2952	0.0777834	8.85136	0.706198	178	85	93	95	9.6	7.15	4.83	1.23	0.91	3.28	6.5	64.6	236	99.37	16	YES
409	66	female	15	NO	YES	YES	NO	NO	NO	NO	NO	NO	NO	NO	NO	NO	NO	30.4832	0.970874	0.617284	26.46	5.82494	1.30553	31.9534	19.9937	0.0805136	8.17247	0.224791	162	80	100	103	8.1	7.08	3.59	0.63	1.73	1.95	9.2	105.8	370.8	47.36	16	NO
410	67	female	10	YES	NO	NO	NO	NO	NO	NO	YES	YES	YES	NO	NO	NO	NO	29.34	1.02488	0.635802	42.75	6.26343	1.37064	30.7409	21.2136	0.0850692	9.52901	0.454145	162	77	103	100.5	9.5	18.23	4.12	0.95	1.33	2.49	7.5	62.1	291.5	89.57	6	NO
411	60	female	12	NO	NO	NO	YES	NO	YES	NO	NO	NO	NO	NO	NO	NO	NO	24.0882	0.9	0.552147	33.92	4.38933	1.31771	30.0528	16.13	0.0845173	9.36883	0.433538	163	64	90	100	10.3	13.92	5.95	1.06	1.35	4.01	4.5	48.1	198.9	102.64	11	NO
412	65	male	10	YES	YES	NO	NO	YES	YES	YES	YES	NO	YES	NO	YES	NO	NO	28.4613	0.942857	0.575581	66.98	4.88675	1.29813	28.5475	19.5768	0.0809781	9.57338	1.09028	172	84.2	99	105	6.8	9.19	4.32	1.97	1.04	2.99	5.7	97.6	270.2	69.28	9	YES
413	69	female	10	YES	YES	NO	NO	YES	NO	NO	NO	NO	YES	YES	YES	NO	NO	27.8159	0.969388	0.58642	64.38	5.12404	1.29835	29.5284	18.0437	0.0813026	9.46221	1.18648	162	73	95	98	7.2	9.31	2.66	1.74	0.86	1.52	4.6	61.4	369.5	88.92	16	NO
414	75	female	20	YES	YES	NO	NO	NO	YES	NO	NO	NO	NO	NO	NO	NO	NO	26.5021	0.942408	0.566038	24	4.68159	1.27197	29.633	16.1788	0.0802953	8.2141	0.499445	159	67	90	95.5	7.8	6.2	3.27	0.75	0.85	2.08	2.6	60.6	160.8	85.62	16	NO
415	66	male	10	YES	NO	YES	NO	YES	NO	NO	YES	NO	YES	NO	NO	NO	NO	26.5338	0.946809	0.532934	34.08	3.99741	1.22661	25.5565	15.8245	0.0774163	8.81128	0.573308	167	74	89	94	6.1	5.95	5.34	1.42	1.32	3.29	3.7	57.3	228.1	101.5	9	NO
416	69	female	19	NO	YES	NO	NO	NO	YES	NO	NO	NO	NO	NO	YES	NO	NO	27.1616	0.946809	0.631206	31.93	6.15333	1.3194	38.1435	15.8245	0.0829488	9.36635	0.464387	141	54	89	94	9.9	14.29	3.72	1.03	1.4	1.99	5.2	54.6	164.4	92.42	6	NO
417	60	female	0.5	NO	NO	NO	NO	NO	NO	NO	NO	NO	YES	NO	YES	NO	NO	27.3438	0.962567	0.5625	52.16	4.60644	1.24832	28.1989	16.1914	0.078393	9.249	0.645687	160	70	90	93.5	10.9	8.03	4.57	1.63	1.42	2.76	4.7	43.6	314.9	106.01	0	YES
418	60	male	19	YES	YES	NO	NO	NO	YES	NO	YES	NO	NO	NO	NO	NO	NO	22.8571	0.959538	0.474286	64.98	2.88923	1.20399	19.3645	13.7694	0.0779013	10.6337	1.48884	175	70	83	86.5	11.7	14.48	5.19	3.61	1.15	3.33	8	79.4	355.7	92.59	6	NO
419	70	male	13	YES	YES	NO	NO	NO	NO	YES	NO	YES	NO	NO	NO	NO	NO	25.9516	0.85	0.5	64.4	3.3588	1.17405	27.1156	14.2925	0.0743736	10.2776	1.36441	170	75	85	100	10	11.37	5.01	3.22	1.18	3.15	7.4	55.2	303.8	100.22	16	NO
420	77	female	21	YES	YES	NO	NO	NO	YES	NO	NO	NO	YES	NO	NO	NO	NO	28.1969	0.951456	0.604938	119.2	5.5401	1.33027	31.9534	19.1905	0.0831127	9.91742	1.82093	162	74	98	103	8.2	8.57	4.85	2.98	0.99	3.08	5.8	56.1	368.2	86.59	6	YES
421	71	female	12	NO	YES	NO	NO	NO	NO	NO	NO	NO	NO	YES	YES	NO	NO	29.0318	0.938776	0.554217	53.72	4.4324	1.21582	27.8209	16.9028	0.0755935	8.66937	0.826097	166	80	92	98	8	4.64	3.68	1.58	1.06	2.22	7.3	51.9	268.6	92.66	16	YES
422	60	male	19	YES	NO	NO	NO	NO	NO	NO	YES	YES	YES	NO	NO	NO	NO	27.8841	0.927835	0.535714	78.5	4.05323	1.20638	26.5459	16.1657	0.0755122	9.91085	1.61745	168	78.7	90	97	11.2	8.08	4.4	3.14	1.04	2.69	8.6	82.7	322.3	88.29	9	YES
423	64	male	8	NO	YES	NO	NO	YES	YES	NO	YES	NO	NO	NO	NO	NO	NO	23.6203	0.919355	0.483051	30.135	3.04644	1.21314	21.4933	14.5811	0.0780649	9.42429	0.582037	177	74	85.5	93	14	10.61	5.13	1.47	1.22	3.38	7.7	55.9	280.9	103.99	9	NO
424	63	female	8	YES	YES	NO	NO	NO	NO	NO	NO	NO	YES	NO	YES	NO	NO	24.5243	0.885417	0.534591	59.94	4.03065	1.24881	29.8824	14.3653	0.0798587	9.6874	1.15223	159	62	85	96	7.5	9.14	4.91	2.22	1.03	3.08	11.3	240.2	295.8	17.95	6	NO
425	74	female	0.5	YES	NO	NO	NO	NO	NO	NO	NO	NO	NO	NO	NO	NO	NO	23.03	0.894737	0.505952	43.2	3.47112	1.25369	25.6274	14.38	0.0810154	8.76067	0.550696	168	65	85	95	5.9	5.02	5.76	1.6	1.47	3.63	5	55.3	390	88.86	6	NO
426	79	male	31	NO	YES	NO	NO	NO	YES	NO	NO	YES	YES	YES	YES	NO	NO	23.4375	0.942529	0.5125	9.69	3.59626	1.22849	24.9872	13.4305	0.0791552	7.34475	0.226453	160	60	82	87	6.3	3.42	3.73	0.57	1.29	2.27	9.1	111.7	411.6	53.72	6	NO
427	60	male	0.17	NO	NO	NO	NO	NO	NO	NO	NO	NO	NO	NO	NO	YES	NO	25.989	0.936842	0.542683	28.56	4.19448	1.25068	27.2333	15.8168	0.0792091	9.07364	0.817459	164	69.9	89	95	7.3	9.23	4.69	1.19	0.79	3.13	6.2	71.6	287.9	96.61	9	NO
428	63	male	5	YES	NO	NO	NO	NO	NO	NO	NO	NO	YES	NO	NO	NO	NO	25.0865	0.941489	0.520588	59.22	3.75311	1.24329	24.4087	15.6433	0.0792061	9.48248	1.04951	170	72.5	88.5	94	8.5	6.56	5.72	2.52	1.25	3.92	5.3	47.5	400.3	111.97	9	YES
429	73	female	19	NO	YES	YES	NO	NO	NO	NO	NO	NO	NO	NO	NO	NO	NO	22.4219	0.947977	0.5125	20.88	3.59626	1.25601	24.7402	13.4338	0.0815278	8.85839	0.2175	160	57.4	82	86.5	7.2	10.18	6.66	0.87	2.05	4.47	7.9	57.7	282	88.24	16	NO
430	83	female	2	NO	YES	NO	NO	NO	NO	NO	YES	NO	YES	YES	NO	NO	NO	29.1363	0.942308	0.632258	24.8	6.17846	1.33788	35.8934	19.1828	0.0831324	8.39975	0.404124	155	70	98	104	14.4	9.03	2.02	0.62	0.97	1.03	5.4	50.6	193.2	85.89	16	NO
431	82	male	10	YES	YES	NO	NO	YES	NO	NO	NO	NO	YES	NO	NO	YES	NO	33.2621	0.963636	0.627219	38.13	6.05851	1.29706	32.0683	22.4608	0.0788368	8.61422	0.502857	169	95	106	110	7.8	7.46	5.1	0.93	1.16	3.05	8.9	91	407.6	67.39	9	NO
432	62	female	26	YES	YES	NO	NO	NO	YES	NO	NO	NO	NO	NO	NO	NO	NO	28.699	0.936842	0.529762	63.24	3.93407	1.17591	25.6274	15.8168	0.0732528	9.34179	0.725312	168	81	89	95	8.4	7.04	6.73	2.04	1.49	4.22	6.3	59.8	389.2	94.21	6	NO
433	62	male	18	YES	NO	YES	NO	NO	NO	NO	NO	YES	NO	NO	NO	NO	NO	21.478	0.924419	0.476048	11.6	2.9206	1.21783	21.8496	12.6109	0.0796183	8.41559	0.202574	167	59.9	79.5	86	7.5	7.11	5.99	0.8	1.88	3.83	4.8	62.5	289.3	100.73	0	NO
434	63	female	10	NO	YES	YES	NO	NO	NO	NO	NO	NO	YES	NO	NO	NO	NO	26.3281	0.914894	0.5375	48.72	4.08925	1.21563	28.446	14.7472	0.0768231	9.57676	0.827655	160	67.4	86	94	8.6	10.44	3.32	1.74	1.13	1.93	4	55	228.4	96.17	6	NO
435	65	male	20	NO	NO	NO	NO	NO	YES	YES	NO	YES	YES	YES	NO	NO	NO	26.2738	0.930481	0.524096	23.1	3.82193	1.20859	25.7169	15.1084	0.0764041	8.47174	0.433308	166	72.4	87	93.5	7.2	5.73	4.63	1.05	1.27	2.98	7.1	70.8	312.7	93.7	12	NO
436	65	male	8	YES	NO	YES	NO	NO	NO	NO	NO	NO	NO	YES	NO	NO	NO	30.0118	0.936842	0.532934	37.68	3.99741	1.15334	26.0199	15.8168	0.0713132	9.25416	1.0727	167	83.7	89	95	9.1	8.38	2.68	1.57	0.78	1.78	6.5	55.7	210.1	103.41	6	YES
437	73	female	6	NO	NO	NO	YES	NO	NO	NO	NO	NO	YES	YES	NO	NO	NO	26.9989	0.956989	0.563291	41.23	4.62321	1.25015	28.8271	15.8308	0.078674	8.57185	0.657173	158	67.4	89	93	11.9	5	4.39	1.33	1.14	2.98	4.8	58.1	402.4	88.04	9	YES
438	62	female	15	YES	NO	YES	NO	NO	NO	NO	NO	NO	YES	NO	NO	NO	NO	28.578	0.958763	0.574074	53.55	4.85411	1.25396	29.0435	17.2868	0.0781696	9.17567	0.798485	162	75	93	97	10.9	7.95	3.45	1.53	1.1	2.13	3.4	52.6	339.9	98.28	12	NO
439	70	female	10	YES	YES	NO	NO	NO	NO	NO	NO	NO	YES	NO	YES	NO	NO	23.6937	0.880208	0.531447	22.79	3.96766	1.26303	29.8824	14.1879	0.0812337	8.58309	0.291111	159	59.9	84.5	96	8.2	7.82	4.94	0.86	1.57	3.13	5.4	43.9	126.9	98.6	6	NO
440	60	female	1	YES	NO	NO	NO	NO	NO	NO	NO	NO	NO	NO	NO	NO	NO	30.1021	1.00962	0.648148	127.84	6.56327	1.37945	32.4383	22.0493	0.0852512	9.9068	1.3059	162	79	105	104	11.2	9.29	6.18	2.72	1.35	3.89	9.5	53.6	370.7	99.05	14	NO
441	69	male	4	YES	NO	YES	NO	NO	NO	NO	NO	NO	YES	YES	NO	YES	YES	24.2215	0.924731	0.505882	14.7	3.4698	1.22955	23.9575	14.7577	0.0787905	7.82907	0.397885	170	70	86	93	7.3	4.52	2.81	0.7	0.89	1.68	5.6	70.4	197.2	91.32	9	NO
442	67	female	2	YES	YES	NO	NO	NO	YES	NO	NO	NO	YES	NO	NO	NO	NO	23.1911	0.949721	0.551948	28.62	4.38519	1.30488	28.8319	14.4358	0.0842257	8.5871	0.430195	154	55	85	89.5	10.7	6.37	4.38	1.06	1.36	2.78	5.5	57.5	228.9	92.14	14	NO
443	66	female	3	NO	NO	NO	NO	NO	YES	NO	NO	NO	NO	NO	NO	NO	NO	22.1311	0.933333	0.515337	26.52	3.65099	1.28309	25.2475	14.0868	0.0834675	8.38158	0.365031	163	58.8	84	90	6.2	5.39	5.95	1.02	1.44	3.92	4.6	55	464.3	94.16	12	NO
444	71	male	25	NO	YES	NO	NO	NO	NO	YES	NO	NO	NO	YES	NO	YES	NO	24.4739	0.83	0.491124	10.26	3.19385	1.18401	27.5166	13.5757	0.0757412	8.31123	0.152973	169	69.9	83	100	9.3	8.99	4.6	0.57	1.83	2.63	5.2	78.9	222.9	85.93	14	NO
445	72	female	20	YES	NO	NO	NO	NO	NO	NO	YES	NO	YES	NO	NO	NO	NO	25.1797	0.956522	0.539877	34.8	4.13739	1.26019	26.2086	15.4768	0.0802334	8.55908	0.481737	163	66.9	88	92	6.2	5.66	5.03	1.16	1.3	3.36	4	41.3	297.2	99.2	6	YES
446	65	female	0	NO	NO	NO	NO	NO	NO	NO	NO	NO	YES	YES	NO	NO	NO	27.1594	0.958763	0.57764	150.15	4.93146	1.29028	29.4824	17.2868	0.081119	10.8422	3.26062	161	70.4	93	97	12.2	15.01	2.94	4.29	0.76	1.8	4	57	197.1	93.72	12	NO
447	60	female	20	NO	YES	NO	NO	NO	YES	NO	NO	NO	NO	NO	YES	NO	NO	16.4237	0.923077	0.455696	25.06	2.56555	1.29671	21.2743	10.3428	0.0886525	8.29972	0.586832	158	41	72	78	11.6	2.83	7.12	1.79	1.39	4.81	4.7	54.5	191.8	98.51	0	NO
448	70	male	8	YES	NO	NO	NO	NO	NO	NO	NO	NO	NO	NO	NO	NO	NO	24.5617	0.960452	0.508982	24.4	3.52882	1.2176	23.008	14.4414	0.0778435	8.7586	0.47766	167	68.5	85	88.5	6.4	6.57	5.54	1.22	1.3	3.73	6	79.8	238.5	86.13	9	YES
449	66	female	16	YES	NO	NO	NO	NO	NO	NO	NO	NO	NO	NO	NO	NO	NO	17.6693	0.962963	0.5	20.2	3.3588	1.363	23.5717	12.1617	0.0920561	8.29462	0.31962	156	43	78	81	5.8	4.99	5.28	1.01	1.58	3.61	4	54.9	208.2	94.22	16	NO
450	67	male	10	YES	YES	NO	NO	NO	YES	NO	NO	NO	NO	NO	NO	NO	NO	22.394	0.965116	0.477011	23.58	2.9378	1.21986	19.4692	13.7717	0.0791983	9.47778	0.41659	174	67.8	83	86	11.1	12.56	4.31	1.31	1.5	2.51	6.4	82.6	291.9	84.18	9	YES
451	73	male	10	YES	YES	NO	NO	NO	YES	YES	NO	NO	YES	NO	NO	NO	NO	24.8016	0.949153	0.5	118.56	3.3588	1.19387	22.6424	14.0978	0.0762029	10.431	4.33333	168	70	84	88.5	7.2	6.84	3.48	6.24	0.72	1.86	7.4	86.6	390.6	76.22	6	YES
452	69	male	21	YES	YES	YES	YES	YES	NO	YES	YES	NO	YES	NO	NO	NO	NO	29.7143	0.943396	0.571429	23.8	4.79704	1.27225	27.7877	19.9748	0.078796	8.11127	0.310857	175	91	100	106	6.7	6.17	3.96	0.68	1.25	2.34	9.4	79.6	285.2	86.83	16	NO
453	60	male	20	NO	YES	NO	NO	NO	NO	YES	NO	YES	NO	NO	YES	NO	NO	24.281	0.924731	0.502924	26.67	3.41381	1.22445	23.59	14.7577	0.0784313	9.11347	0.63239	171	71	86	93	7.3	9	4.38	1.27	1.01	2.84	9.3	110.6	420.5	62.13	16	NO
454	64	female	17	YES	YES	NO	NO	NO	YES	NO	NO	NO	YES	NO	NO	NO	NO	25.6745	0.977778	0.590604	24.6	5.21688	1.3053	31.4838	15.4852	0.0828364	8.17989	0.318615	149	57	88	90	7.6	5.48	5.91	0.82	1.52	3.35	3.9	52.4	216	97.03	9	NO
455	69	female	1.25	YES	YES	NO	NO	NO	NO	NO	NO	NO	NO	NO	NO	NO	NO	23.8803	0.949721	0.52795	34.56	3.89808	1.25765	25.8111	14.4358	0.0807818	9.08511	0.48617	161	61.9	85	89.5	10.6	8.68	4.99	1.28	1.39	2.89	6	55	246.5	92.2	9	YES
456	74	female	2	NO	YES	NO	NO	NO	NO	NO	NO	YES	NO	NO	NO	NO	NO	20.0288	1.07143	0.56962	349.12	4.75819	1.46778	24.2955	16.1748	0.0970831	12.0511	7.062	158	50	90	84	10.1	19.77	5.44	10.91	0.88	2.71	10.4	51.2	422.6	91.14	16	YES
457	74	female	0.17	NO	NO	NO	NO	NO	NO	NO	NO	NO	YES	NO	NO	NO	NO	20.7031	0.898876	0.5	23.54	3.3588	1.27522	25.9754	12.7433	0.0838828	9.11513	0.336478	160	53	80	89	7.9	10.7	4.46	1.07	1.59	2.72	6.6	58	204.5	87.47	9	NO
458	60	male	30	YES	YES	NO	NO	NO	YES	NO	NO	NO	YES	NO	YES	YES	NO	23.03	0.91954	0.47619	41.55	2.92314	1.17994	21.9535	12.7657	0.0762498	10.3507	2.27422	168	65	80	87	8.4	14.22	1.72	2.77	0.58	1.06	5.6	67.2	323.7	99.16	12	YES
459	63	female	3	YES	NO	NO	NO	NO	NO	NO	NO	NO	YES	NO	NO	NO	NO	26.1176	0.946237	0.556962	69.9	4.48978	1.25678	28.8271	15.4705	0.0795302	9.89334	1.27228	158	65.2	88	93	11.1	10.7	3.58	2.33	1.02	2.1	5.8	48.5	264.7	100.23	6	YES
460	71	male	10	YES	NO	NO	NO	NO	YES	NO	NO	NO	NO	YES	YES	YES	NO	27.5482	0.972527	0.536364	51.23	4.06632	1.20428	24.9354	15.6601	0.0755334	10.0592	1.14635	165	75	88.5	91	10.2	13.5	3.7	2.18	1.02	2.18	6.7	63.3	414.9	94.07	12	YES
461	66	female	0	NO	NO	NO	NO	NO	NO	NO	NO	NO	NO	NO	NO	NO	NO	30.339	0.990385	0.647799	65.7	6.5547	1.36054	33.8726	21.2173	0.0839727	8.87374	0.465905	159	76.7	103	104	7.6	6.16	6.22	1.46	2.03	3.78	7.2	61.5	238.1	90.76	9	NO
462	84	male	22	NO	YES	NO	NO	NO	YES	YES	NO	YES	YES	NO	NO	NO	NO	29.0612	1.0101	0.571429	45.5	4.79704	1.28646	24.764	19.9993	0.0799721	8.87834	0.728291	175	89	100	99	6.8	6.95	3.33	1.3	1.02	2.22	10.2	130.9	402.4	42.81	12	NO
463	63	female	14	YES	YES	NO	NO	YES	YES	NO	YES	NO	YES	NO	NO	NO	NO	34.0176	1.10417	0.666667	64.32	7.02433	1.3223	29.8824	22.402	0.0800702	8.53015	0.850794	159	86	106	96	6.2	4.76	3.04	1.34	1.05	1.77	5.3	52.5	333.3	97.65	16	NO
464	63	male	10	NO	NO	YES	NO	NO	NO	NO	NO	NO	NO	NO	YES	NO	NO	25.2493	1.01064	0.533708	44.7	4.01291	1.30006	21.582	18.0493	0.0827333	8.89246	0.631131	178	80	95	94	6	6.15	4.97	1.49	1.26	3.23	5.7	67	350	97.21	12	YES
465	65	female	4	YES	YES	NO	NO	NO	YES	NO	NO	NO	NO	NO	NO	NO	NO	28.3775	0.989796	0.62987	73.32	6.12149	1.34616	33.2796	18.8173	0.0840161	9.62598	0.939806	154	67.3	97	98	11.1	10.15	3.99	1.88	1.26	2.58	4.8	63	267.5	89.27	11	NO
466	77	female	10	YES	NO	NO	NO	NO	NO	NO	NO	NO	NO	NO	NO	NO	NO	21.0772	0.960452	0.521472	32.94	3.77041	1.33043	24.5267	14.4414	0.0872536	9.00788	0.57315	163	56	85	88.5	7	8.43	2.67	1.22	1.11	1.42	4.5	54.1	322.7	87.63	6	NO
467	75	female	10	YES	YES	YES	NO	NO	NO	YES	NO	NO	YES	NO	NO	NO	NO	29.5312	0.957447	0.5625	52.16	4.60644	1.2012	28.446	16.1888	0.0744723	9.81128	0.985887	160	75.6	90	94	6.2	14.09	3.44	1.63	0.93	1.93	5.2	47.8	277.1	92.57	16	NO
468	65	male	23	YES	YES	NO	YES	NO	YES	NO	NO	NO	NO	NO	NO	NO	NO	27.6421	0.936842	0.502825	17.04	3.41194	1.16732	22.3426	15.8168	0.0731738	8.26916	0.440748	177	86.6	89	95	7	6.92	2.35	0.71	0.81	1.35	5.2	64	378.8	97.68	12	NO
469	68	male	8	NO	NO	YES	NO	NO	YES	YES	NO	NO	NO	NO	NO	NO	NO	24.3375	0.978495	0.52907	67.86	3.92031	1.29037	23.2278	16.5592	0.0826216	9.65415	1.20076	172	72	91	93	6.1	7.52	4.3	2.61	1.15	2.82	4.1	61.2	309.1	97.41	9	NO
470	65	male	10	YES	NO	NO	NO	NO	NO	NO	NO	NO	NO	NO	NO	YES	YES	21.9671	0.977011	0.505952	21.8	3.47112	1.28366	21.9535	14.4472	0.0836082	8.45719	1.19889	168	62	85	87	5.6	5.44	2.21	1.09	0.46	1.46	4.4	54	402.1	104.74	12	NO
471	63	female	15	YES	YES	NO	NO	NO	YES	NO	NO	NO	YES	NO	NO	NO	NO	24.0346	0.972527	0.560127	49.41	4.5563	1.31756	27.8201	15.6601	0.0845389	9.60026	0.832482	158	60	88.5	91	10	11.48	5	1.62	1.09	3.4	3.9	61.6	263.8	92.65	12	YES
472	62	male	7	YES	NO	YES	NO	NO	NO	NO	NO	NO	NO	NO	NO	YES	YES	26.6022	1.02247	0.52907	51.22	3.92031	1.23422	21.4546	16.5592	0.0778631	9.35944	1.01191	172	78.7	91	89	11.8	7.42	4.69	1.97	1.03	3.3	5.9	75.8	349.4	93.05	9	YES
473	66	male	0	NO	NO	NO	NO	NO	NO	NO	NO	NO	NO	NO	NO	NO	NO	27.4286	0.952128	0.511429	20.825	3.57567	1.18516	22.6042	16.0063	0.0743878	9.30465	0.233717	175	84	89.5	94	10.1	16.28	5.76	0.85	1.86	3.76	7	68.6	329.3	94.26	12	NO
474	67	female	4	YES	NO	YES	NO	NO	NO	YES	NO	NO	YES	NO	NO	NO	NO	25.3565	0.977778	0.556962	33.6	4.48978	1.27551	27.3166	15.4852	0.0811137	8.76464	0.424352	158	63.3	88	90	7.1	7.2	4.9	1.12	1.47	3.17	5	62.7	326.5	88.53	12	NO
475	67	male	6	YES	NO	NO	NO	NO	NO	NO	NO	NO	NO	YES	NO	NO	NO	24.9135	0.994382	0.520588	49.35	3.75311	1.2476	22.1529	15.6643	0.0795724	9.29863	1.16302	170	72	88.5	89	7.4	6.55	3.44	2.1	0.94	1.91	4.73	101.9	325.3	65.3	12	NO
476	63	female	1	NO	NO	NO	NO	NO	NO	NO	NO	NO	NO	NO	NO	NO	NO	22.3081	0.949721	0.518293	31.86	3.70834	1.28925	24.6145	14.4358	0.083757	9.45941	0.456407	164	60	85	89.5	13.1	13.69	5.67	1.18	1.34	3.99	7.9	49.6	189.1	99.49	12	NO
477	63	female	2	YES	YES	NO	NO	NO	NO	NO	NO	NO	YES	NO	NO	NO	NO	31.7148	0.952	0.72561	61.61	8.58269	1.5138	41.5174	28.2968	0.0927436	8.68731	0.407148	164	85.3	119	125	11.1	7.39	5.81	1.01	1.8	3.69	4.9	54.5	362.1	96.46	11	NO
478	65	male	20	YES	YES	YES	NO	NO	NO	NO	NO	YES	YES	NO	NO	NO	NO	24.9459	0.921348	0.476744	20.06	2.93302	1.14848	21.4546	13.4137	0.0732347	8.75672	0.625065	172	73.8	82	89	6.1	6.78	3.08	1.18	0.9	1.73	6.6	81.8	327.9	86.38	9	NO
479	63	female	5	NO	NO	NO	NO	NO	YES	YES	NO	NO	YES	NO	NO	NO	NO	22.1443	0.91954	0.47619	22.44	2.92314	1.20331	21.9535	12.7657	0.0782698	8.43046	0.551948	168	62.5	80	87	9.4	5.66	4.44	1.02	0.88	3.07	4.7	48.7	289.2	100.09	16	NO
480	63	female	15	YES	NO	NO	NO	NO	YES	YES	NO	NO	YES	YES	NO	NO	NO	31.2488	1.04762	0.691824	171.08	7.67248	1.4317	34.3713	24.1825	0.0879304	10.1687	1.33888	159	79	110	105	9.8	9.98	5.51	3.29	1.7	3.2	4.5	52	371.7	97.96	12	YES
481	68	female	20	NO	YES	NO	NO	NO	YES	NO	YES	NO	YES	NO	YES	NO	NO	29.4704	0.972222	0.644172	84.13	6.46604	1.38987	33.897	22.0437	0.0861994	9.67178	0.985528	163	78.3	105	108	8.6	11.16	4.58	1.79	1.17	2.99	6.4	59.2	397.9	90.63	16	YES
482	69	female	25	YES	YES	NO	NO	NO	YES	NO	NO	NO	YES	YES	NO	NO	NO	28.9341	1.02083	0.608696	60.8	5.62616	1.31729	28.9929	19.2052	0.0819483	8.99056	1.05138	161	75	98	96	8.1	6.65	2.87	1.52	0.88	1.69	5.3	61.1	490.4	89.06	9	YES
483	68	female	20	NO	YES	NO	NO	NO	YES	NO	NO	NO	NO	NO	NO	NO	NO	26.8977	0.974093	0.591195	32.76	5.23004	1.3187	30.1317	17.6676	0.0830398	8.73701	0.330054	159	68	94	96.5	7.1	8.62	6.26	0.91	1.63	4.21	6.9	57.7	281.8	91.39	9	NO
484	67	male	16	YES	YES	NO	NO	NO	YES	NO	NO	NO	NO	NO	YES	NO	NO	21.7914	0.94382	0.531646	7.41	3.97163	1.31335	26.813	14.0945	0.0856566	7.16832	0.144994	158	54.4	84	89	5.8	4.19	3.07	0.39	1.43	1.87	4.5	59.6	322.9	99.17	12	NO
485	77	female	15	NO	YES	NO	NO	NO	YES	NO	NO	YES	YES	YES	YES	NO	NO	18.6667	0.916667	0.513333	26.79	3.6123	1.33501	27.7238	11.8237	0.0893444	9.3214	0.561085	150	42	77	84	9.1	9.98	5.53	1.41	1.29	3.65	6.2	63.3	401.1	81.58	9	YES
486	71	male	10	YES	YES	NO	NO	NO	NO	NO	NO	NO	YES	NO	NO	NO	NO	28.3266	1.04787	0.58982	137.015	5.19944	1.31388	25.5565	19.3903	0.0820254	11.4176	2.51288	167	79	98.5	94	12.6	27.99	5.16	4.09	0.96	3.02	9.9	134.8	616.2	45.27	0	NO
487	60	male	7	YES	YES	NO	NO	NO	NO	NO	NO	YES	YES	NO	YES	YES	NO	29.0688	0.990476	0.608187	22.23	5.61448	1.3533	28.9564	21.6313	0.0841235	8.10572	0.270833	171	85	104	105	6	7.32	2.43	0.57	1.28	1.03	4.4	46.6	133.8	115.26	12	NO
488	72	male	0	NO	NO	NO	NO	NO	NO	NO	NO	NO	NO	NO	YES	NO	NO	21.0556	0.903226	0.535032	116.09	4.0395	1.34035	29.2752	14.0553	0.0879193	11.4938	1.71154	157	51.9	84	93	11.4	20.22	9.78	6.11	1.91	6.19	13.1	97.6	353.9	66.42	9	YES
489	71	female	10	YES	NO	YES	NO	NO	NO	NO	NO	NO	NO	NO	NO	NO	NO	19.5556	0.940476	0.526667	23.31	3.87265	1.3382	27.7238	12.4645	0.0888658	9.02655	0.395	150	44	79	84	6.6	9.44	3.73	1.11	1.48	2.09	5	52.5	306	92.31	9	NO
490	62	male	2	YES	YES	NO	NO	NO	NO	NO	NO	NO	YES	NO	NO	YES	YES	27.9931	0.944444	0.5	42.4	3.3588	1.13043	22.604	14.4325	0.0707121	9.15676	1.03922	170	80.9	85	90	6.1	5.63	4.09	2.12	1.02	2.36	6.8	82.6	438.3	87.19	6	NO
491	60	male	2	YES	NO	NO	NO	NO	NO	YES	NO	NO	YES	NO	NO	NO	NO	24.5089	0.967033	0.52071	22.08	3.75549	1.25444	23.4201	15.4817	0.0802274	8.0927	0.393608	169	70	88	91	6.2	4.29	4.78	0.96	1.27	2.64	5.9	69.5	342.5	97.8	12	YES
492	73	female	4	YES	NO	NO	NO	NO	NO	NO	NO	NO	YES	NO	NO	NO	NO	24.9219	0.955556	0.5375	53.48	4.08925	1.24946	26.4695	14.7808	0.0796865	9.78221	0.653901	160	63.8	86	90	12.5	11.68	7.17	1.91	1.57	4.87	5.6	57.4	210.6	88.39	6	NO
493	69	female	16	YES	YES	NO	NO	NO	NO	NO	NO	NO	YES	NO	YES	NO	NO	21.7153	0.942529	0.532468	22.08	3.98807	1.3009	27.5238	13.4305	0.0848939	7.84088	0.550416	154	51.5	82	87	10.8	3.48	2.75	0.92	0.89	1.66	6	58.6	223.2	90.29	0	YES
494	70	female	5	NO	NO	NO	NO	NO	NO	NO	NO	NO	NO	NO	NO	NO	NO	20.9566	0.935294	0.509615	25.155	3.54092	1.27561	25.6247	12.6193	0.0837383	8.72282	0.496875	156	51	79.5	85	6.5	6.61	5.49	1.17	1.2	3.64	4.1	58.4	300.6	89.76	6	NO
495	75	female	15	YES	YES	YES	NO	NO	NO	YES	NO	NO	YES	NO	NO	NO	NO	26.8581	0.955556	0.540881	153.72	4.15777	1.20736	26.8897	14.7808	0.0760471	10.6666	2.99943	159	67.9	86	90	8.8	9.84	5	5.49	0.99	2.94	8.1	76.8	396.9	65.49	15	YES
496	70	male	0.17	NO	NO	NO	NO	NO	NO	NO	NO	NO	YES	NO	NO	YES	YES	28.075	0.968421	0.528736	21.6	3.91367	1.20761	23.3904	16.9217	0.0755034	9.2695	0.222626	174	85	92	95	11.4	16.7	5.02	0.8	1.9	2.98	4.9	76	331.8	87.87	9	NO
497	65	male	10	YES	NO	NO	NO	NO	YES	NO	NO	YES	YES	NO	NO	YES	YES	27.181	0.967742	0.542169	27.25	4.18399	1.22922	25.4831	16.1937	0.0772701	8.37085	0.609241	166	74.9	90	93	6.4	4.99	3.88	1.09	0.97	2.54	4.2	70.8	406.5	93.7	12	NO
498	70	female	5	YES	YES	NO	NO	NO	YES	NO	NO	YES	YES	YES	YES	NO	NO	27.5482	0.807018	0.557576	46.24	4.50265	1.25191	35.7872	16.5892	0.0785206	9.20501	0.597089	165	75	92	114	8.2	9.21	4.74	1.36	1.27	3.02	5.9	62.5	247.3	87.02	0	YES
499	63	female	15	NO	YES	YES	NO	NO	NO	NO	NO	NO	NO	NO	NO	NO	NO	19.2277	0.91954	0.506329	19.8	3.47828	1.33159	25.806	12.7657	0.0886768	9.37886	0.249014	158	48	80	87	11.9	16.56	7.18	0.9	1.83	4.9	7.7	51.3	185.8	98.39	16	NO
500	67	male	20	YES	YES	YES	NO	NO	NO	NO	NO	NO	YES	NO	YES	NO	NO	20.9572	0.915254	0.5	7.52	3.3588	1.27537	24.9211	13.0826	0.0837219	7.75319	0.132768	162	55	81	88.5	6.4	6.24	5.17	0.47	1.77	2.86	8.5	53.4	232.6	103.75	15	YES
501	67	female	0.5	NO	NO	NO	NO	NO	NO	NO	NO	NO	NO	NO	NO	NO	NO	17.2584	0.939759	0.5	18.6	3.3588	1.37913	24.5982	12.1505	0.0935116	8.95222	0.177481	156	42	78	83	7.9	10.46	7.02	0.93	2.62	4.17	6.9	89.7	250.9	57.42	16	NO
502	66	male	1	NO	NO	NO	NO	NO	NO	NO	NO	NO	NO	NO	NO	YES	YES	21.5065	0.89011	0.482143	8.64	3.03001	1.23629	23.7905	13.052	0.0808072	8.49904	0.170168	168	60.7	81	91	10.3	11.45	3.32	0.54	1.53	1.76	6	66	290.2	95.77	12	NO
503	76	female	10	YES	NO	YES	NO	NO	YES	NO	NO	YES	YES	NO	YES	NO	NO	24.7957	0.977778	0.556962	87.3	4.48978	1.28985	27.3166	15.4852	0.0823322	10.8199	1.20056	158	61.9	88	90	11	21.64	5.86	2.91	1.35	3.6	8.7	74.2	359.2	67.8	9	YES
504	64	female	30	YES	YES	NO	NO	NO	NO	NO	YES	NO	NO	NO	NO	NO	NO	28.9216	0.904762	0.601266	46.62	5.45653	1.28931	34.8693	17.98	0.0802133	8.61853	0.552989	158	72.2	95	105	7.5	5.53	5.3	1.26	1.37	3.56	4.9	67.4	329.5	82.85	16	NO
505	65	male	8	YES	YES	YES	NO	NO	NO	NO	NO	NO	YES	YES	NO	NO	NO	29.7578	1.05263	0.588235	73.85	5.16424	1.28988	24.8598	19.9825	0.0798684	9.62225	1.36393	170	86	100	95	9.2	9.01	2.55	2.11	0.91	1.44	4.2	78.4	275.9	89.86	12	NO
506	79	male	0.67	NO	YES	NO	NO	NO	NO	NO	NO	NO	NO	NO	NO	NO	NO	21.9429	0.988889	0.508571	20.88	3.52098	1.31764	20.8763	15.8413	0.0858372	8.32639	0.42544	175	67.2	89	90	7.8	5.98	3.1	0.87	1.04	1.92	6.8	73.2	459.7	83.77	12	NO
507	67	female	15	YES	NO	NO	NO	NO	YES	NO	NO	NO	YES	NO	NO	NO	NO	22.9688	0.824176	0.46875	44.88	2.79146	1.13503	26.9636	11.0708	0.0733798	9.58243	0.896739	160	58.8	75	91	6.7	6.92	6.55	2.64	1.38	4.17	6.4	58.9	406.8	91.42	6	YES
508	66	male	20	YES	YES	NO	NO	NO	NO	YES	NO	NO	YES	NO	NO	NO	NO	23.6713	0.959596	0.533708	43.5	4.01291	1.34269	23.6874	18.0388	0.0863706	9.02565	0.672936	178	75	95	99	6.4	7.22	4.29	1.45	1.15	3.09	4.1	67.2	279	95.07	6	YES
509	70	female	29	NO	YES	NO	NO	NO	YES	NO	NO	NO	NO	NO	NO	NO	NO	14.0604	0.830986	0.364198	0.63	1.16433	1.13415	16.4339	6.8612	0.0795726	8.09923	0.130366	162	36.9	59	71	5.8	6.58	4.32	0.63	1.76	2.07	10	107.3	373.9	45.28	12	NO
510	71	female	14	NO	YES	YES	NO	NO	YES	NO	YES	NO	YES	NO	YES	NO	NO	26.7229	0.979167	0.576687	38.88	4.91075	1.30667	28.1307	17.6692	0.0823718	9.07658	0.418001	163	71	94	96	10.2	10.2	6.5	1.08	1.49	4.05	6	78.2	362.4	65.9	11	NO
511	67	female	0.5	YES	NO	NO	NO	NO	NO	NO	NO	NO	YES	NO	NO	NO	NO	29.6158	1.03	0.656051	103.05	6.75836	1.3858	32.8336	21.2117	0.085876	9.95765	1.633	157	73	103	100	10	11.61	5.23	2.29	0.92	3.27	5.3	52.9	205	94.71	9	YES
512	70	female	0.08	YES	NO	NO	NO	NO	YES	NO	NO	NO	YES	NO	NO	NO	NO	21.9917	1	0.550633	60.03	4.35792	1.35405	25.806	15.138	0.0881763	9.42235	0.949842	158	54.9	87	87	10.9	7.52	6.59	2.07	1.2	4.6	8.2	79.9	225.9	64.67	12	NO
513	75	female	20	NO	NO	NO	YES	NO	YES	NO	NO	NO	YES	NO	YES	NO	NO	24.22	0.978022	0.566879	26.35	4.69953	1.32412	28.2585	15.8392	0.084851	8.66996	0.446155	157	59.7	89	91	7.7	8.63	3.04	0.85	1.08	1.73	4.4	63.9	156.3	81.8	9	NO
514	73	male	20	YES	YES	YES	NO	NO	YES	NO	YES	NO	NO	YES	YES	NO	NO	22.8085	0.961111	0.530675	21.715	3.95226	1.30151	25.2475	14.9559	0.0842411	8.53564	0.458104	163	60.6	86.5	90	6.5	6.35	3.51	1.01	1.17	2.21	6.5	81.6	391.6	81.9	6	NO
515	75	male	5	YES	YES	NO	NO	NO	NO	NO	NO	YES	YES	YES	NO	NO	NO	23.5294	1.13636	0.588235	87.85	5.16424	1.45059	21.7017	19.8992	0.0934046	9.83075	1.27282	170	68	100	88	11.2	9.33	4.93	2.51	1.16	3.18	11.7	90	379.4	71.74	6	YES
516	69	male	10	YES	NO	NO	NO	NO	YES	NO	NO	NO	YES	NO	NO	YES	YES	25.548	1	0.548193	31.72	4.30749	1.28198	24.548	16.562	0.0814235	9.02784	0.916158	166	70.4	91	91	11.4	8.6	3.56	1.22	0.73	2.23	4.5	79.8	289.7	86.74	9	NO
517	60	male	13	YES	YES	NO	NO	NO	YES	NO	YES	YES	YES	NO	NO	NO	YES	25.2385	0.961749	0.51462	35.42	3.63712	1.22893	22.9192	15.4794	0.0782123	8.78237	0.677363	171	73.8	88	91.5	7.3	5.33	3.59	1.54	1.17	2.27	7	72.6	328.8	96.06	9	YES
518	75	male	15	NO	NO	NO	YES	NO	YES	NO	NO	NO	NO	NO	NO	YES	YES	25.9516	1.15789	0.647059	87.3	6.53657	1.51936	24.8598	24.0425	0.0962482	9.28868	1.09156	170	75	110	95	7.6	7.02	4.25	1.94	1.15	2.68	4.2	74.5	300.1	85.54	6	YES
519	71	female	20	YES	YES	NO	NO	NO	NO	NO	NO	NO	NO	NO	YES	NO	NO	29.3724	0.961165	0.603659	441.16	5.51092	1.30863	31.0424	19.5908	0.0812058	10.8872	9.02134	164	79	99	103	8.7	6.26	4.93	10.76	0.72	2.34	6.7	60.1	295.2	88.3	6	YES
520	80	male	15	NO	NO	NO	NO	NO	YES	YES	NO	NO	YES	NO	NO	YES	NO	24.1685	1.09574	0.598837	117.8	5.40155	1.46562	23.6711	21.1613	0.0939522	10.5559	1.47333	172	71.5	103	94	11.2	15.6	5.7	3.1	1.26	3.63	6.6	114.2	257.2	51.93	9	NO
521	70	female	0.83	YES	NO	NO	NO	NO	NO	NO	NO	YES	YES	NO	NO	NO	NO	20.5457	0.965517	0.538462	39.52	4.10869	1.36123	26.6511	14.1057	0.089654	8.92692	0.395392	156	50	84	87	7.2	6.24	6.12	1.52	2.07	3.92	4.6	54.9	269.6	91.61	9	NO
522	62	female	24	YES	YES	NO	NO	NO	YES	NO	NO	NO	NO	NO	NO	NO	NO	23.2434	0.901099	0.506173	30.96	3.47531	1.22597	26.1336	13.3913	0.0791024	8.80368	0.424002	162	61	82	91	11	6.5	6.38	1.29	1.54	3.75	6.7	45	331.2	103.45	11	NO
523	61	male	7	YES	NO	YES	NO	NO	YES	NO	NO	NO	NO	NO	NO	NO	NO	25.4327	0.947368	0.517241	32	3.6879	1.24121	23.3904	16.1825	0.0788932	9.00603	0.682545	174	77	90	95	8.6	8.02	4.08	1.28	0.97	2.75	5.9	58.8	332.2	104.02	9	NO
524	72	female	15	YES	NO	YES	NO	NO	NO	NO	NO	NO	YES	NO	NO	NO	NO	21.3599	0.943182	0.522013	86	3.781	1.30663	25.8922	13.7605	0.0855027	10.1513	1.39203	159	54	83	88	8.3	9.38	4.49	3.44	1.29	2.79	3.6	62.8	678.5	85.31	12	NO
525	77	female	10	YES	YES	NO	NO	NO	YES	NO	NO	NO	YES	NO	YES	NO	NO	21.2444	0.94382	0.56	47.32	4.55363	1.36516	30.4455	14.0945	0.0894136	9.38264	1.10783	150	47.8	84	89	8.5	8.22	3.39	1.82	0.92	2.25	4.8	60	207.6	84.7	6	YES
526	72	male	20	YES	NO	YES	NO	NO	NO	NO	NO	YES	YES	NO	NO	NO	NO	23.1837	0.946809	0.508571	18.24	3.52098	1.2819	22.6042	15.8245	0.0827465	8.3838	0.246187	175	71	89	94	7.6	7.25	4.69	0.76	1.57	2.91	8.6	65.3	273.7	92.22	9	NO
527	69	male	10	YES	NO	NO	NO	NO	NO	YES	NO	YES	NO	YES	NO	NO	NO	23.7954	0.955556	0.52439	37.8	3.82772	1.263	24.8526	14.7808	0.0811736	9.36058	0.786585	164	64	86	90	6.6	8.13	3.52	1.8	1.2	2.15	7.67	104.3	454.8	78.5	9	YES
528	61	female	0.08	NO	NO	NO	NO	NO	NO	NO	NO	NO	NO	NO	NO	NO	NO	28.7638	0.95	0.605096	76.59	5.54369	1.29695	32.8336	18.0325	0.0807624	10.0967	1.03516	157	70.9	95	100	12.9	14.76	4.64	2.07	1.21	3.07	4.4	52.1	243.6	99.28	0	NO
529	63	male	10	YES	YES	YES	NO	NO	YES	NO	NO	YES	NO	NO	NO	NO	NO	24.9796	0.947917	0.52	26.78	3.74162	1.26271	23.4681	16.5445	0.0805005	9.48871	0.315059	175	76.5	91	96	9.1	16.15	5.53	1.03	1.7	3.82	6.5	64.5	292.9	98.74	16	NO
530	68	male	30	YES	YES	YES	NO	NO	NO	NO	YES	YES	NO	YES	YES	NO	NO	25.6544	0.955556	0.52439	13.44	3.82772	1.21638	24.8526	14.7808	0.0772033	8.59838	0.353273	164	69	86	90	7.8	10.67	3.59	0.64	0.95	2.35	11.1	77.4	428.3	88.45	12	NO
531	70	male	10	YES	YES	NO	NO	NO	NO	NO	NO	NO	NO	NO	YES	NO	NO	22.6431	0.905882	0.496774	5.04	3.2985	1.19242	26.0475	11.8132	0.0772742	8.41686	0.239822	155	54.4	77	85	11	13.56	2.61	0.42	0.87	1.53	5.5	64.5	236.2	94	12	NO
532	60	male	5	YES	YES	NO	NO	NO	NO	NO	NO	NO	NO	NO	NO	NO	NO	24.5675	0.967742	0.529412	38.25	3.92711	1.27765	23.9575	16.1937	0.0816791	9.31077	0.778846	170	71	90	93	10.1	9.1	4.51	1.53	1.04	3.2	5.2	63.8	302.4	101.3	6	YES
533	83	female	30	YES	YES	NO	NO	NO	YES	NO	NO	NO	YES	YES	YES	YES	NO	23.2834	0.907216	0.594595	30.9	5.30605	1.37531	35.874	15.4313	0.088713	8.30618	0.440599	148	51	88	97	6.7	4.95	4.4	1.03	1.39	2.85	6.4	58.5	274.2	81.88	6	NO
534	64	male	0.5	NO	NO	NO	NO	NO	YES	NO	NO	NO	NO	NO	NO	YES	YES	27.3275	1	0.579268	36.9	4.96695	1.30189	27.2333	18.05	0.0817652	9.02901	0.552326	164	73.5	95	95	12.3	8.54	5.29	1.23	1.29	3.53	6.7	56.6	248.2	103.46	12	NO
535	70	female	17	YES	NO	NO	NO	NO	YES	NO	NO	NO	YES	NO	NO	NO	NO	22.0444	0.964706	0.546667	23.52	4.27607	1.30825	28.2681	13.4417	0.08516	8.48641	0.402807	150	49.6	82	85	7.3	6.23	3.33	0.98	1.33	1.85	8	60.1	371.6	88.92	9	NO
536	68	female	10	YES	NO	YES	NO	NO	NO	YES	NO	NO	YES	NO	NO	NO	NO	20.0877	0.837209	0.486486	16.1	3.10886	1.21146	29.7646	10.2308	0.0800907	8.70255	0.447568	148	44	72	86	8.2	6.59	4.14	1.15	1.25	2.96	10.2	64.8	289.3	84.48	16	NO
537	61	male	20	YES	YES	NO	NO	YES	YES	NO	YES	YES	YES	NO	NO	NO	YES	28.2094	1.02151	0.575758	135	4.89057	1.27749	25.879	18.0472	0.0798092	10.1143	1.85065	165	76.8	95	93	7.1	6.91	7.05	4.5	1.4	4.7	8.5	66.9	295.4	98.65	9	YES
538	61	male	4	YES	NO	NO	NO	NO	NO	NO	YES	YES	NO	YES	NO	YES	YES	26.3958	1.08421	0.595376	91.2	5.32358	1.39836	23.7498	21.1732	0.0883333	9.45481	1.76408	173	79	103	95	7.6	6.7	3.33	2.4	0.81	2.12	5.6	65.9	321.5	99.26	9	YES
539	70	male	20	YES	YES	YES	NO	NO	YES	NO	NO	NO	YES	NO	NO	NO	NO	23.4711	0.95122	0.472727	7.67	2.86158	1.1499	20.689	12.1568	0.0740737	8.12922	0.175415	165	63.9	78	82	6.3	7.24	5	0.59	1.59	3.43	6.8	95.8	270.8	68.9	16	NO
540	63	male	6	YES	NO	YES	YES	NO	YES	NO	NO	YES	YES	YES	NO	YES	YES	18.424	0.928571	0.464286	12.35	2.71346	1.28624	20.5758	12.1428	0.0862681	9.05692	0.479425	168	52	78	84	10.8	11.37	2.48	0.95	0.92	1.4	11.3	88.7	441.3	79.43	6	NO
541	63	male	2	NO	NO	NO	NO	NO	NO	NO	NO	NO	NO	NO	NO	NO	NO	23.7228	0.914894	0.49711	26.04	3.30476	1.23159	23.3103	14.7472	0.079195	9.16344	0.648859	173	71	86	94	12.1	9.69	3.83	1.24	0.95	2.51	6.9	61.1	397.9	100.96	12	NO
542	60	male	12	YES	NO	NO	NO	NO	NO	NO	NO	NO	NO	NO	NO	YES	NO	25.463	0.979592	0.533333	41.54	4.00541	1.30093	22.5805	18.4292	0.0826727	9.2962	0.60565	180	82.5	96	98	8.6	10.24	5.98	1.34	1.18	4.02	3.4	56.4	226.8	106.56	6	YES
543	60	female	1	YES	YES	NO	NO	NO	NO	NO	NO	YES	NO	NO	NO	NO	NO	35.4925	1.01852	0.68323	91	7.44823	1.33501	34.867	24.1972	0.0802704	9.32995	1.17221	161	92	110	108	8.2	8.11	4.67	1.75	1.02	2.91	6.3	51	311.4	100.68	12	NO
544	68	male	5	YES	YES	NO	NO	NO	NO	NO	NO	YES	YES	NO	YES	NO	NO	24.9108	1	0.573171	26.97	4.83459	1.34923	26.7571	17.672	0.086056	8.80189	0.394851	164	67	94	94	9.4	9	3.97	0.93	1.35	2.21	5.3	57.7	160.6	99.8	12	NO
545	77	female	0.17	NO	NO	NO	NO	NO	NO	NO	NO	NO	YES	NO	NO	NO	NO	27.7117	1.05102	0.591954	112.05	5.24698	1.36083	24.6975	21.2005	0.0852682	10.2574	1.038	174	83.9	103	98	12.9	14.41	5.49	2.49	1.42	3.48	4.3	52.4	199.6	88.56	6	YES
546	67	female	19	YES	YES	YES	NO	NO	NO	NO	NO	NO	NO	NO	NO	NO	NO	36.9001	0.951613	0.75641	94.8	9.45247	1.42685	45.6407	27.8228	0.0852383	9.11841	0.653076	156	89.8	118	124	6	7.27	5.93	1.58	1.83	3.42	12.9	146.4	190.4	31.76	9	YES
547	68	female	0.17	YES	NO	NO	NO	NO	NO	YES	NO	NO	YES	YES	YES	NO	NO	22.2266	1.03448	0.5625	44.48	4.60644	1.38459	24.9872	16.1937	0.0900052	9.24298	0.86875	160	56.9	90	87	14.4	9.36	5.68	1.39	0.9	4.09	4.9	64.4	329	85.12	6	YES
548	66	male	10	YES	NO	YES	NO	NO	NO	NO	NO	YES	YES	NO	YES	NO	NO	29.7521	1.03	0.624242	148.58	5.98813	1.34868	29.1818	21.2117	0.0835123	10.2268	1.98438	165	81	103	100	8.9	8.9	6.66	3.91	1.23	4.66	7.7	81.8	409.1	85.77	12	NO
549	67	female	15	YES	YES	NO	NO	NO	YES	NO	NO	NO	NO	NO	NO	NO	NO	24.653	1.01149	0.594595	48.6	5.30605	1.33657	30.32	15.4873	0.0853961	9.59939	1.14672	148	54	88	87	10.1	11.47	4.16	1.62	0.84	2.84	5.8	69.8	151.7	77.77	6	YES
550	62	female	14	YES	YES	YES	NO	NO	NO	NO	NO	NO	YES	NO	NO	NO	NO	26.7094	0.967742	0.576923	50.56	4.91587	1.27915	29.7305	16.1937	0.0806438	9.14555	0.533063	156	65	90	93	7.5	7.47	5.47	1.58	1.71	3.21	6.1	56.9	188.3	95.77	16	NO
551	61	female	20	YES	YES	NO	NO	NO	NO	NO	NO	NO	YES	NO	NO	NO	NO	26.9929	0.895238	0.573171	24.12	4.83459	1.29615	31.9946	17.5873	0.0815718	8.71124	0.228586	164	72.6	94	105	8.6	11.41	6.96	0.67	1.68	4.42	5.5	48.1	145.2	101.92	12	NO
552	74	female	10	YES	NO	YES	NO	NO	YES	NO	NO	YES	NO	NO	NO	NO	NO	17.6654	0.790123	0.405063	8.16	1.75084	1.11138	22.7849	7.9897	0.0750646	10.1678	0.293025	158	44.1	64	81	11.8	24.12	6.45	1.36	1.88	4.02	8.4	43.8	274.5	95.94	6	YES
553	76	male	21	YES	YES	YES	NO	NO	YES	NO	NO	NO	YES	NO	NO	NO	NO	24.6904	1.05814	0.565217	31.2	4.66412	1.32415	24.0978	16.5445	0.0845817	9.11819	0.892449	161	64	91	86	6.8	9.57	4.14	1.2	0.76	2.79	4.2	62.8	304.1	91.12	16	YES
554	74	female	20	NO	YES	NO	NO	NO	YES	NO	NO	NO	NO	NO	NO	NO	NO	29.6427	0.980392	0.632911	56.7	6.19409	1.34056	33.3588	19.9972	0.0830602	8.8476	0.647296	158	74	100	102	6.7	6.49	5.02	1.35	1.32	3.29	5.3	55.5	327.6	88.75	12	YES
555	68	female	0.25	NO	NO	NO	NO	NO	NO	NO	NO	NO	YES	NO	NO	NO	NO	22.719	0.923913	0.541401	61.02	4.16836	1.30571	28.7669	14.4157	0.0845688	10.3701	1.02821	157	56	85	92	15.2	17.77	5.9	2.26	1.19	3.88	5.9	61.5	191.5	89.5	6	NO
556	73	female	9	YES	YES	YES	NO	NO	YES	NO	NO	NO	NO	YES	YES	NO	NO	21.4573	0.848837	0.493243	10.5	3.23295	1.18844	29.7646	10.5397	0.0777098	8.07841	0.355949	148	47	73	86	7.8	5.8	2.29	0.7	0.97	1.16	2.6	52	331.5	91.31	9	NO
557	72	female	8	YES	YES	NO	NO	NO	NO	NO	NO	NO	YES	NO	NO	NO	NO	44.8495	0.980583	0.701389	54.18	7.92553	1.15301	41.6065	20.3992	0.0666758	9.01856	1.00426	144	93	101	103	8.6	8.25	3.91	1.26	0.88	2.46	4.9	70.4	331.4	74.31	12	YES
558	64	male	10	YES	YES	YES	NO	NO	NO	NO	NO	NO	YES	NO	NO	YES	YES	24.9135	1.05556	0.558824	13.2	4.52886	1.33923	22.604	18.0325	0.0854167	8.59838	0.166137	170	72	95	90	8.8	15.52	4.12	0.44	1.48	2.35	6.5	70.9	293.3	94.31	6	NO
559	61	female	3	YES	YES	NO	NO	NO	YES	NO	NO	NO	YES	NO	NO	NO	NO	31.854	0.990291	0.69863	44	7.85217	1.37219	40.3859	20.8073	0.0840068	8.70801	0.40618	146	67.9	102	103	7.1	7.62	3.91	1	1.72	2.28	5.8	49	246.9	101.3	12	NO
560	64	male	10	NO	YES	NO	NO	NO	NO	NO	YES	NO	YES	YES	NO	NO	NO	26.2976	1.04167	0.588235	45.5	5.16424	1.37212	25.311	19.9888	0.0867291	8.27196	0.714678	170	76	100	96	6.6	3.79	3.59	1.3	1.07	2.19	7.8	93.7	374.1	73.81	12	NO
561	75	male	23	YES	YES	NO	NO	NO	NO	NO	YES	NO	YES	NO	YES	NO	NO	27.9904	1.04211	0.589286	36.38	5.18755	1.32449	25.6274	19.5908	0.082853	8.45145	0.650037	168	79	99	95	7.3	5.51	4.41	1.07	0.97	2.96	6.3	69.2	284.9	88.17	12	NO
562	61	male	21	YES	YES	NO	NO	NO	YES	NO	NO	NO	YES	NO	NO	NO	NO	25.4694	0.948454	0.525714	21.6	3.85383	1.26425	23.9001	16.9105	0.0803384	7.88679	0.356416	175	78	92	97	7.4	4.19	4.77	0.8	1.18	3.23	5.8	70	313.2	96.83	9	NO
563	63	male	3	NO	NO	NO	NO	NO	NO	NO	NO	NO	NO	NO	YES	YES	NO	23.2434	0.968085	0.561728	61.1	4.59012	1.36053	27.5885	16.5557	0.0877844	9.70867	1.08202	162	61	91	94	7.5	8.82	4.2	2.35	1.22	2.41	4.6	84.5	225.5	84.23	12	YES
564	71	male	1	YES	YES	NO	NO	NO	NO	NO	NO	NO	NO	NO	NO	NO	NO	24.7957	0.968085	0.575949	29.38	4.89473	1.33382	29.3306	16.5557	0.085139	9.15463	0.496811	158	61.9	91	94	10.8	10.54	5.22	1.13	1.31	3.54	5.8	70.5	233.8	89.99	0	NO
565	66	female	4	YES	NO	YES	NO	NO	YES	NO	NO	NO	NO	NO	NO	NO	NO	28.8044	0.886792	0.598726	25.56	5.39904	1.2824	35.8836	17.5712	0.0798372	8.35231	0.250056	157	71	94	106	7.7	7.52	4.2	0.71	1.7	2.19	5.3	42.6	244.2	102.42	12	NO
566	60	female	2	YES	NO	YES	NO	NO	NO	NO	NO	NO	NO	NO	NO	NO	NO	32.05	0.895652	0.656051	127.35	6.75836	1.33213	40.4586	21.1172	0.0814708	9.68322	1.54719	157	79	103	115	7.5	7.14	5.84	2.83	1.2	3.77	5.4	49.1	279.4	101.95	9	YES
567	69	female	19	NO	NO	YES	NO	NO	YES	NO	NO	NO	YES	NO	NO	NO	NO	20.9366	0.86747	0.436364	16.66	2.24295	1.12386	21.1609	10.2833	0.073788	8.83906	0.255799	165	57	72	83	12.2	7.3	6.64	1.19	2.03	4.13	5.7	66.5	331.9	81.3	9	YES
568	69	female	20	NO	YES	NO	NO	NO	NO	NO	NO	NO	NO	YES	YES	NO	NO	21.58	0.923977	0.541096	25.83	4.16215	1.29121	30.466	12.4524	0.0843495	8.4254	0.646163	146	46	79	85.5	8.1	4.67	3.73	1.23	1.03	2.31	5.7	64.7	247.2	84.05	12	NO
569	64	male	1	NO	NO	NO	NO	NO	NO	NO	NO	NO	YES	NO	YES	YES	YES	29.0612	0.917431	0.571429	42.35	4.79704	1.28646	29.0836	19.9433	0.0799721	9.11492	0.557604	175	89	100	109	7.5	9.46	3.75	1.21	1.24	2.12	4.5	78.1	248.4	90.64	12	NO
570	61	female	0.17	NO	NO	NO	NO	NO	NO	NO	NO	NO	NO	NO	NO	NO	NO	23.6541	0.957447	0.566038	104.64	4.68159	1.34637	28.8848	16.1888	0.0866176	10.0242	1.39169	159	59.8	90	94	9.6	8.69	6.39	3.27	1.33	4.46	3.7	46.8	399.9	102.85	9	YES
571	69	female	7	YES	NO	NO	NO	NO	YES	NO	NO	NO	YES	NO	NO	NO	NO	25.462	1.08046	0.583851	37.08	5.06738	1.34692	24.5873	17.6377	0.085596	9.0553	0.423498	161	66	94	87	9.6	10.47	4.11	1.03	1.42	2.32	5.9	80.3	350.8	64.73	0	NO
572	60	female	5	NO	NO	NO	NO	NO	NO	NO	NO	NO	YES	NO	YES	NO	NO	23.939	0.970297	0.573099	59.6	4.83305	1.40523	27.1676	19.2017	0.0902244	9.3071	0.459096	171	70	98	101	7.7	9.31	5.65	1.49	1.86	3.36	4.6	49.8	379.3	101.48	12	YES
573	70	male	25	NO	YES	NO	NO	NO	NO	NO	YES	NO	YES	NO	NO	YES	NO	28.699	1.06122	0.619048	93.6	5.86612	1.3741	27.0051	21.6068	0.0855988	8.71272	1.09244	168	81	104	98	8.4	3.19	5.87	2.4	1.36	4.22	12.6	191.9	236.5	29.75	9	NO
574	73	male	28	YES	YES	YES	NO	NO	YES	NO	YES	YES	NO	NO	NO	NO	NO	21.7993	0.858824	0.429412	5.04	2.13043	1.10015	20.3482	10.5572	0.0717469	8.21668	0.273262	170	63	73	85	9.3	7.4	3.51	0.63	0.99	2.39	9.3	60.1	206.3	94.76	16	NO
575	69	male	10	YES	YES	NO	YES	NO	YES	YES	NO	NO	NO	NO	NO	NO	NO	24.0238	0.926316	0.526946	14.72	3.87818	1.27461	26.0199	15.4537	0.0817893	7.06385	0.276431	167	67	88	95	5.9	2.3	2.91	0.64	1.22	1.58	5.9	61.8	307.6	96.34	16	NO
576	66	male	2	YES	NO	NO	NO	NO	YES	NO	NO	NO	YES	NO	NO	NO	NO	31.7752	0.952381	0.578035	36.75	4.94006	1.23739	28.1445	19.9825	0.0757853	8.74492	0.527771	173	95.1	100	105	9.1	7.53	3.34	1.05	1.15	2.08	5.8	57.3	245.5	101.5	15	YES
577	62	male	18	NO	YES	NO	NO	NO	YES	NO	NO	YES	NO	NO	NO	NO	NO	23.1481	0.883721	0.422222	10.45	2.016	1.08017	17.6115	11.482	0.0697429	9.08467	0.422222	180	75	76	86	7.8	11.69	4.13	0.95	0.95	2.79	8.9	61.8	177.1	101.2	12	NO
578	70	male	10	YES	NO	YES	NO	NO	YES	NO	NO	NO	NO	YES	NO	YES	NO	23.4075	0.978495	0.50838	63.7	3.51732	1.28977	20.8332	16.5592	0.0831211	10.2095	1.36872	179	75	91	93	12.2	13.96	4.76	2.45	0.91	3.36	4.1	56.8	285.5	99.05	9	YES
579	70	female	20	YES	YES	NO	YES	NO	YES	NO	NO	NO	YES	NO	YES	NO	NO	26.9531	0.979798	0.60625	33.54	5.57008	1.35513	30.9165	18.8152	0.0853046	8.9644	0.34301	160	69	97	99	10.9	11.45	3.26	0.86	1.52	1.7	6	57.7	296.2	90.12	12	NO
580	64	female	10	YES	NO	YES	NO	NO	YES	NO	NO	NO	YES	NO	NO	NO	NO	26.7759	0.957447	0.573248	71.36	4.83627	1.27349	29.7835	16.1888	0.0802533	10.1541	0.881617	157	66	90	94	10	14.51	5.96	2.23	1.45	4.15	5.5	76.5	247.5	71.09	6	NO
581	71	female	30	YES	YES	NO	NO	NO	YES	NO	NO	NO	YES	NO	NO	NO	NO	28.9062	0.99	0.61875	205.41	5.85916	1.33553	31.4106	19.6013	0.0830961	10.7752	2.38457	160	74	99	100	10.4	12.02	8.06	5.01	1.3	5.04	7.7	55.1	366	90.86	6	YES
582	67	male	20	YES	YES	NO	NO	NO	YES	NO	NO	NO	NO	NO	NO	NO	NO	25.4581	0.895833	0.51497	21.63	3.64389	1.21004	26.4833	14.722	0.0768995	9.14653	0.46528	167	71	86	96	10.8	11.47	4.83	1.03	1.14	3.2	6.1	85.6	247.1	80.62	12	YES
583	78	female	21	YES	YES	NO	NO	NO	YES	NO	NO	NO	YES	NO	NO	NO	NO	35.5248	0.918699	0.748344	72.6	9.22099	1.41546	48.2887	25.468	0.0850947	9.06871	0.581067	151	81	113	123	7.4	8.28	4.58	1.32	1.7	2.37	8.6	68.7	300.3	73.38	6	NO
584	66	male	40	YES	YES	NO	NO	YES	YES	NO	NO	NO	YES	YES	NO	NO	NO	31.3543	1	0.614458	21.09	5.75921	1.29709	29.6912	20.808	0.0796186	8.37479	0.224513	166	86.4	102	102	9.3	9.58	3.5	0.57	1.56	1.98	5.3	70.5	336.7	93.21	12	NO
585	65	male	10	YES	NO	NO	NO	NO	YES	NO	NO	NO	NO	NO	NO	NO	NO	21.9671	0.944444	0.505952	24.8	3.47112	1.28366	23.3313	14.4325	0.0836082	9.40031	0.429713	168	62	85	90	8.9	12.28	5.84	1.24	1.46	3.89	5.4	61.4	269.7	99.35	9	YES
586	60	female	15	YES	NO	NO	NO	YES	NO	NO	NO	NO	YES	YES	NO	NO	NO	24.9199	0.897959	0.553459	31.2	4.41661	1.28258	30.8799	15.418	0.0818	9.18878	0.420144	159	63	88	98	8.6	11.85	5.75	1.04	1.37	3.91	6	50.1	214.5	101.28	9	NO
587	71	female	8	YES	YES	NO	NO	NO	NO	NO	NO	NO	YES	NO	NO	NO	NO	24.1288	0.921348	0.515723	18.72	3.65846	1.21457	26.3909	13.4137	0.0778798	8.16924	0.248311	159	61	82	89	7.8	5.7	4.85	0.78	1.62	2.95	4.6	55.7	222.3	90.53	6	NO
